# Supplementary material for: Synaptic mitochondria regulate hair-cell synapse size and function
Source: eLife journal article supplement (doi:10.7554/elife.48914), 2019-10-14
Supplement: supp [file elife-48914-supp-v1.zip]

Archive with 28 entries (28 files):
- elife_poa_e48914_Figure_7_figure_supplement_1.jpg
- elife_poa_e48914_Figure_5_figure_supplement_2_source_data_1.xlsx
- elife_poa_e48914_Figure_2_figure_supplement_1.jpg
- elife_poa_e48914_Figure_1_figure_supplement_1.jpg
- elife_poa_e48914_Figure_3_figure_supplement_1.jpg
- elife_poa_e48914_Video_1.mp4
- elife_poa_e48914_Figure_1_figure_supplement_2_source_data_1.xlsx
- elife_poa_e48914_Figure_7_source_data_1.xlsx
- elife_poa_e48914_Figure_3_source_data_1.xlsx
- elife_poa_e48914_Figure_4_figure_supplement_1_source_data_1.xlsx
- elife_poa_e48914_Figure_5_figure_supplement_1.jpg
- elife_poa_e48914_Transparent_Reporting_File.pdf
- elife_poa_e48914_Figure_2_source_data_1.xlsx
- elife_poa_e48914_Figure_1_figure_supplement_2.jpg
- elife_poa_e48914_Figure_6_source_data_1.xlsx
- elife_poa_e48914_Figure_7_figure_supplement_1_source_data_1.xlsx
- elife_poa_e48914_Figure_4_source_data_1.xlsx
- elife_poa_e48914_Figure_3_figure_supplement_2_source_data_1.xlsx
- elife_poa_e48914_Figure_4_figure_supplement_1.jpg
- elife_poa_e48914_Figure_5_figure_supplement_2.jpg
- elife_poa_e48914_Video_2.avi
- elife_poa_e48914_Figure_1_figure_supplement_1_source_data_1.xlsx
- elife_poa_e48914_Figure_5_figure_supplement_1_source_data_1.xlsx
- elife_poa_e48914_Figure_3_figure_supplement_2.jpg
- elife_poa_e48914_Figure_2_figure_supplement_1_source_data_1.xlsx
- elife_poa_e48914_Figure_3_figure_supplement_1_source_data_1.xlsx
- elife_poa_e48914_Figure_5_source_data_1.xlsx
- elife_poa_e48914_Figure_1_source_data_1.xlsx
