# Supplementary material for: Synaptic mitochondria regulate hair-cell synapse size and function
Source: eLife journal article supplement (doi:10.7554/elife.48914), 2019-10-14
Supplement: supp [file elife-48914-supp-v1.zip › elife_poa_e48914_Figure_1_figure_supplement_1_source_data_1.xlsx]

## Sheet: Figure 1-figure sup 1B
Figure 1-figure supplement 1C
Time (s)	Baseline-corrected of cytoGCaMP3				Time (s)	mitoGCaMP3 AVG 7 cells
-1.8	0.0135371	0.0091879	31		-2.5	0.024228	0.00854717	7
-1.6	0.00878824	0.0101767	31		-2	0.0260913	0.00513519	7
-1.4	0.00532176	0.0077994	31		-1.5	0.0164256	0.00483871	7
-1.2	-0.000299236	0.00690816	31		-1	0.025859	0.00837196	7
-1	0.00246748	0.00674052	31		-0.5	0.0177913	0.00576108	7
-0.8	-0.00472355	0.00665497	31		0	-0.00431118	0.00990663	7
-0.6	-0.00650759	0.0074376	31		0.5	0.023217	0.0297387	7
-0.4	-0.00973177	0.00879293	31		1	0.139956	0.0607824	7
-0.2	-0.00885246	0.00963485	31		1.5	0.278356	0.0840018	7
0	-0.0109378	0.0100196	31		2	0.418416	0.113302	7
0.2	0.000796438	0.02121	31		2.5	0.5122	0.119103	7
0.4	0.0129952	0.0360909	31		3	0.516428	0.124951	7
0.6	0.0193711	0.0465146	31		3.5	0.527026	0.126041	7
0.8	0.0282886	0.0662721	31		4	0.521678	0.121213	7
1	0.0540762	0.121742	31		4.5	0.514323	0.121698	7
1.2	0.0841948	0.192483	31		5	0.515743	0.123711	7
1.4	0.132873	0.251662	31		5.5	0.508578	0.121223	7
1.6	0.185515	0.304685	31		6	0.491651	0.121624	7
1.8	0.248473	0.36253	31		6.5	0.500257	0.116883	7
2	0.323918	0.427785	31		7	0.500076	0.115163	7
2.2	0.348544	0.418688	31		7.5	0.493254	0.115263	7
2.4	0.314233	0.350683	31		8	0.492414	0.109106	7
2.6	0.275905	0.292614	31		8.5	0.499307	0.11234	7
2.8	0.246883	0.245438	31		9	0.489987	0.110059	7
3	0.226661	0.210841	31		9.5	0.479448	0.103741	7
3.2	0.209982	0.185424	31		10	0.48503	0.110123	7
3.4	0.195966	0.164004	31		10.5	0.491518	0.109411	7
3.6	0.187458	0.153843	31		11	0.473965	0.110212	7
3.8	0.18025	0.139859	31		11.5	0.464161	0.10872	7
4	0.174022	0.134451	31		12	0.476526	0.11006	7
4.2	0.165233	0.125361	31		12.5	0.453333	0.104511	7
4.4	0.157361	0.120584	31		13	0.459219	0.110805	7
4.6	0.149448	0.115597	31		13.5	0.463125	0.106378	7
4.8	0.13607	0.113361	31		14	0.482106	0.108713	7
5	0.145133	0.104184	31		14.5	0.464319	0.115587	7
5.2	0.140721	0.100881	31		15	0.467073	0.11184	7
5.4	0.131274	0.0955744	31		15.5	0.469217	0.112399	7
5.6	0.125307	0.0936619	31		16	0.464115	0.112739	7
5.8	0.119099	0.0879661	31		16.5	0.471095	0.10612	7
6	0.113813	0.0861019	31		17	0.440559	0.113457	7
6.2	0.110739	0.0859143	31		17.5	0.452044	0.109344	7
6.4	0.105066	0.0812093	31		18	0.456374	0.110177	7
6.6	0.106674	0.0774995	31		18.5	0.467495	0.106191	7
6.8	0.100139	0.0771152	31		19	0.453792	0.101457	7
7	0.0965693	0.0746533	31		19.5	0.461135	0.103105	7
7.2	0.0908454	0.0748832	31		20	0.459837	0.0987672	7
7.4	0.0857475	0.0735097	31		20.5	0.46962	0.100477	7
7.6	0.0835475	0.0721098	31		21	0.46074	0.096912	7
7.8	0.0797383	0.0701853	31		21.5	0.44968	0.0953314	7
8	0.0791375	0.0698784	31		22	0.442075	0.0966129	7
8.2	0.075666	0.0682792	31		22.5	0.453077	0.0975355	7
8.4	0.0730942	0.0680901	31		23	0.466016	0.0985799	7
8.6	0.0715914	0.0681509	31		23.5	0.461988	0.0974349	7
8.8	0.0691538	0.0660957	31		24	0.440299	0.0945627	7
9	0.0663279	0.0647109	31		24.5	0.452468	0.0988843	7
9.2	0.0642563	0.0646585	31		25	0.44453	0.0996099	7
9.4	0.0587979	0.0624438	31		25.5	0.4528	0.0981777	7
9.6	0.06044	0.0653356	31		26	0.457523	0.100982	7
9.8	0.0540149	0.0624699	31		26.5	0.448748	0.0993823	7
10	0.0528431	0.0627972	31		27	0.442427	0.0999279	7
10.2	0.0525434	0.0578987	31		27.5	0.451139	0.0994334	7
10.4	0.0476957	0.0596586	31		28	0.434687	0.0949797	7
10.6	0.0444986	0.0586539	31		28.5	0.447571	0.0989453	7
10.8	0.0446393	0.0580201	31		29	0.441241	0.0998791	7
11	0.0398375	0.0552893	31		29.5	0.452492	0.0963773	7
11.2	0.0390802	0.0555129	31		30	0.444366	0.0979211	7
11.4	0.0347452	0.0529861	31		30.5	0.426733	0.0973455	7
11.6	0.0329971	0.0535899	31		31	0.422968	0.0987955	7
11.8	0.0336692	0.0516647	31		31.5	0.427927	0.0897769	7
12	0.0327139	0.0529122	31		32	0.422418	0.0949203	7
12.2	0.0286312	0.0510301	31		32.5	0.428394	0.0911911	7
12.4	0.0259172	0.0513325	31		33	0.411275	0.0923271	7
12.6	0.0245113	0.0501987	31		33.5	0.408801	0.0917795	7
12.8	0.0223251	0.0495081	31		34	0.412174	0.0920384	7
13	0.0238512	0.0509518	31		34.5	0.420631	0.0991568	7
13.2	0.0206348	0.0502311	31		35	0.407178	0.0952108	7
13.4	0.021948	0.0447193	31		35.5	0.408365	0.0890551	7
13.6	0.016606	0.0480462	31		36	0.409513	0.0924975	7
13.8	0.0177385	0.0458998	31		36.5	0.41697	0.0975546	7
14	0.0157361	0.0453288	31		37	0.423402	0.093072	7
14.2	0.0135928	0.0456687	31		37.5	0.418123	0.087448	7
14.4	0.0124391	0.0443856	31		38	0.423453	0.0903214	7
14.6	0.0118829	0.0426526	31		38.5	0.421602	0.0886331	7
14.8	0.0113617	0.0434835	31		39	0.413373	0.0975398	7
15	0.00759033	0.0431535	31		39.5	0.415646	0.0930162	7
15.2	0.00757119	0.0409574	31		40	0.41796	0.0829456	7
15.4	0.0048595	0.042499	31		40.5	0.40733	0.090235	7
15.6	0.00470693	0.039025	31		41	0.411838	0.0870901	7
15.8	0.00483178	0.0414136	31		41.5	0.415321	0.086176	7
16	0.00479256	0.0392708	31		42	0.425292	0.0905092	7
16.2	0.00379385	0.0379872	31		42.5	0.411226	0.0899161	7
16.4	-0.000647302	0.0397141	31		43	0.406945	0.086405	7
16.6	0.00170289	0.0411174	31		43.5	0.401235	0.0856934	7
16.8	0.000562946	0.0371396	31		44	0.397569	0.082404	7
17	-0.0045257	0.0397269	31		44.5	0.394595	0.0861999	7
17.2	0.00201045	0.0376576	31		45	0.39672	0.0880129	7
17.4	-0.00262523	0.0371388	31		45.5	0.407031	0.0838263	7
17.6	-0.000328956	0.0352064	31		46	0.387102	0.0865177	7
17.8	-0.00421599	0.0359615	31		46.5	0.39432	0.0856186	7
18	0.000112007	0.0343339	31		47	0.382643	0.0909553	7
18.2	-0.00141442	0.0349302	31		47.5	0.383634	0.0875306	7
18.4	-0.00210592	0.0368309	31		48	0.383316	0.0889445	7
18.6	-0.00699921	0.0368119	31		48.5	0.382877	0.092033	7
18.8	-0.00577183	0.0335586	31		49	0.386732	0.0876436	7
19	-0.00280863	0.0355463	31		49.5	0.39258	0.0924611	7
19.2	-0.00455329	0.0335889	31		50	0.391713	0.0840217	7
19.4	-0.00853919	0.0357873	31		50.5	0.383223	0.087687	7
19.6	-0.00688293	0.0348477	31		51	0.378847	0.0923615	7
19.8	-0.00471249	0.0327105	31		51.5	0.374094	0.0833942	7
20	-0.00355425	0.0310454	31		52	0.38107	0.086525	7
20.2	-0.00565025	0.0308893	31		52.5	0.379579	0.0868646	7
20.4	-0.00791533	0.0342661	31		53	0.385038	0.0895021	7
20.6	-0.00402568	0.0306576	31		53.5	0.367476	0.0850673	7
20.8	-0.00558917	0.0344927	31		54	0.390713	0.0842203	7
21	-0.00808396	0.0296832	31		54.5	0.365921	0.0887159	7
21.2	-0.00577222	0.0296367	31		55	0.382438	0.0869934	7
21.4	-0.00860505	0.0335958	31		55.5	0.379518	0.0825827	7
21.6	-0.0111935	0.0298006	31		56	0.363027	0.0797801	7
21.8	-0.0100285	0.0294789	31		56.5	0.376972	0.0830262	7
22	-0.010897	0.0314006	31		57	0.359589	0.0792828	7
22.2	-0.0130337	0.0311373	31		57.5	0.355042	0.0792227	7
22.4	-0.0137158	0.0306681	31		58	0.365611	0.083953	7
22.6	-0.0130949	0.0311559	31		58.5	0.375925	0.0788281	7
22.8	-0.0124711	0.030967	31		59	0.370584	0.0810064	7
23	-0.0128654	0.0328204	31		59.5	0.369666	0.0806939	7
23.2	-0.0123034	0.0354551	31		60	0.35953	0.0802544	7
23.4	-0.0169191	0.0308465	31		60.5	0.35394	0.0830714	7
23.6	-0.0142473	0.0305379	31		61	0.366103	0.0878597	7
23.8	-0.0151651	0.0281463	31		61.5	0.358004	0.0825873	7
24	-0.0174136	0.0316064	31		62	0.356757	0.0824891	7
24.2	-0.0167898	0.030578	31		62.5	0.347892	0.0799707	7
24.4	-0.0161562	0.0286156	31		63	0.354981	0.081866	7
24.6	-0.0182584	0.0303769	31		63.5	0.353941	0.0795605	7
24.8	-0.016453	0.030592	31		64	0.345891	0.0885193	7
25	-0.0175569	0.0280582	31		64.5	0.346742	0.0904186	7
25.2	-0.018114	0.0307852	31		65	0.345273	0.0844122	7
25.4	-0.0186585	0.0297194	31		65.5	0.332733	0.082175	7
25.6	-0.0177199	0.0307796	31		66	0.33999	0.0857576	7
25.8	-0.0168073	0.0325724	31		66.5	0.323414	0.0777076	7
26	-0.0210672	0.0291381	31		67	0.338863	0.0802119	7
26.2	-0.0197664	0.0310013	31		67.5	0.348849	0.0770452	7
26.4	-0.0192504	0.0290792	31		68	0.333715	0.079122	7
26.6	-0.0197238	0.0294146	31		68.5	0.348525	0.0841945	7
26.8	-0.0204118	0.031698	31		69	0.336671	0.0798563	7
27	-0.015208	0.0310916	31		69.5	0.340699	0.0840986	7
27.2	-0.0208713	0.0289234	31		70	0.341329	0.077691	7
27.4	-0.0185604	0.0305098	31		70.5	0.351358	0.0826546	7
27.6	-0.0197789	0.0301376	31		71	0.338502	0.0801326	7
27.8	-0.0209986	0.0291786	31		71.5	0.332437	0.0761336	7
28	-0.0224155	0.0280031	31		72	0.340877	0.0793802	7
28.2	-0.0170678	0.0313794	31		72.5	0.343478	0.08387	7
28.4	-0.021669	0.0323879	31		73	0.33782	0.0878835	7
28.6	-0.0179374	0.0322996	31		73.5	0.342527	0.0793119	7
28.8	-0.021173	0.0329378	31		74	0.342286	0.0804712	7
29	-0.0204797	0.0323427	31		74.5	0.340022	0.075206	7
29.2	-0.0223301	0.0323839	31		75	0.345081	0.0794657	7
29.4	-0.0201066	0.0315319	31		75.5	0.339624	0.0793722	7
29.6	-0.0201891	0.0289176	31		76	0.333954	0.0761692	7
29.8	-0.0217894	0.0329685	31		76.5	0.325745	0.0829773	7
30	-0.0192745	0.0341381	31		77	0.333689	0.0789093	7
30.2	-0.0212438	0.0297569	31		77.5	0.331931	0.0803038	7
30.4	-0.0172339	0.0330438	31		78	0.319674	0.08154	7
30.6	-0.0245532	0.0312093	31		78.5	0.325202	0.0788369	7
30.8	-0.0202938	0.0319262	31		79	0.307473	0.0836769	7
31	-0.0205706	0.0306343	31		79.5	0.325137	0.0792555	7
31.2	-0.0175553	0.0288146	31		80	0.323349	0.0869871	7
31.4	-0.0202392	0.0315164	31		80.5	0.323073	0.0804518	7
31.6	-0.0158388	0.0278819	31		81	0.312075	0.0834239	7
31.8	-0.022155	0.0298642	31		81.5	0.315501	0.0815395	7
32	-0.0204024	0.0306459	31		82	0.325884	0.0892542	7
32.2	-0.0199136	0.0288574	31		82.5	0.33494	0.0852294	7
32.4	-0.0209541	0.029503	31		83	0.323116	0.0821171	7
32.6	-0.01794	0.0292665	31		83.5	0.310171	0.0791505	7
32.8	-0.020713	0.030844	31		84	0.319432	0.0802901	7
33	-0.0220908	0.0296529	31		84.5	0.324823	0.0769066	7
33.2	-0.0207014	0.0290678	31		85	0.312898	0.0716909	7
33.4	-0.0202294	0.0277735	31		85.5	0.327225	0.0815439	7
33.6	-0.0185487	0.0297104	31		86	0.319935	0.077158	7
33.8	-0.0222552	0.0295391	31		86.5	0.315147	0.0715231	7
34	-0.0211804	0.0291185	31		87	0.306006	0.0751284	7
34.2	-0.0178599	0.0266605	31		87.5	0.305355	0.0731709	7
34.4	-0.0175166	0.0270924	31		88	0.300845	0.0702096	7
34.6	-0.0185918	0.0261254	31		88.5	0.309479	0.0725724	7
34.8	-0.0194928	0.0311808	31		89	0.320097	0.0742711	7
35	-0.019636	0.0294701	31		89.5	0.316363	0.0789127	7
35.2	-0.017646	0.0262459	31		90	0.305381	0.0685454	7
35.4	-0.0181099	0.0279268	31		90.5	0.294693	0.074676	7
35.6	-0.0201318	0.0263973	31		91	0.311916	0.0729937	7
35.8	-0.018958	0.0281943	31		91.5	0.309716	0.0744351	7
36	-0.0207213	0.0264162	31		92	0.295001	0.0740398	7
36.2	-0.0176721	0.0284634	31		92.5	0.29886	0.0756515	7
36.4	-0.0247269	0.0279663	31		93	0.30163	0.0738349	7
36.6	-0.0257699	0.0278669	31		93.5	0.30367	0.073762	7
36.8	-0.0221753	0.0274276	31		94	0.297419	0.0711425	7
37	-0.0228084	0.0274875	31		94.5	0.295721	0.0725045	7
37.2	-0.0222287	0.0265502	31		95	0.292015	0.0711863	7
37.4	-0.022087	0.0302718	31		95.5	0.286839	0.0749422	7
37.6	-0.0240538	0.0281775	31		96	0.283324	0.0709607	7
37.8	-0.023236	0.0309214	31		96.5	0.289893	0.0713336	7
38	-0.0228823	0.0298286	31		97	0.301586	0.0750425	7
38.2	-0.0226396	0.0285801	31		97.5	0.300169	0.0643044	7
38.4	-0.022483	0.0313357	31		98	0.292893	0.0698609	7
38.6	-0.0251355	0.0295069	31		98.5	0.290207	0.0702819	7
38.8	-0.0220233	0.0287774	31		99	0.279039	0.072678	7
39	-0.0225021	0.0296089	31		99.5	0.26998	0.0751789	7
39.2	-0.0239265	0.0320645	31		100	0.289255	0.0688679	7
39.4	-0.022807	0.0329836	31		100.5	0.293153	0.0717804	7
39.6	-0.0242435	0.0304303	31		101	0.291631	0.066645	7
39.8	-0.0201199	0.030811	31		101.5	0.29576	0.0682678	7
40	-0.02285	0.031172	31		102	0.282625	0.0695776	7
40.2	-0.0222371	0.0306054	31		102.5	0.302385	0.0664105	7
40.4	-0.0229789	0.0334859	31		103	0.282423	0.0677809	7
40.6	-0.0227191	0.0326276	31		103.5	0.287786	0.0662999	7
40.8	-0.018536	0.0286573	31		104	0.284179	0.0652035	7
41	-0.0206474	0.0308871	31		104.5	0.27679	0.0728919	7
41.2	-0.0249272	0.0294074	31		105	0.268261	0.0728027	7
41.4	-0.0231753	0.0244202	31		105.5	0.278951	0.0755714	7
41.6	-0.0205369	0.0263901	31		106	0.286428	0.0713953	7
41.8	-0.0218727	0.0256982	31		106.5	0.275481	0.0761341	7
42	-0.0237112	0.0277061	31		107	0.280681	0.0732737	7
42.2	-0.0198458	0.0255895	31		107.5	0.284854	0.0783969	7
42.4	-0.0218087	0.0257621	31		108	0.280437	0.0692029	7
42.6	-0.0204888	0.0267166	31		108.5	0.275259	0.0698119	7
42.8	-0.0230856	0.0279035	31		109	0.266186	0.0711417	7
43	-0.0213605	0.0276384	31		109.5	0.284	0.0664657	7
43.2	-0.0190559	0.0252821	31		110	0.281272	0.0661012	7
43.4	-0.0232406	0.0261871	31		110.5	0.282245	0.07249	7
43.6	-0.0249288	0.0257122	31		111	0.276621	0.0741183	7
43.8	-0.0217853	0.027478	31		111.5	0.289713	0.0685301	7
44	-0.0189364	0.0267423	31		112	0.288847	0.0741972	7
44.2	-0.0223246	0.0284954	31		112.5	0.290689	0.0724566	7
44.4	-0.0210507	0.0262739	31		113	0.290436	0.0707032	7
44.6	-0.0186807	0.0303618	31		113.5	0.295678	0.0710402	7
44.8	-0.0180451	0.0263549	31		114	0.294578	0.0696422	7
45	-0.0220859	0.0263616	31		114.5	0.301088	0.0731668	7
45.2	-0.0226444	0.0290101	31		115	0.316954	0.0673824	7
45.4	-0.0240916	0.0279925	31		115.5	0.296761	0.0676326	7
45.6	-0.0212823	0.0280769	31		116	0.317174	0.0754002	7
45.8	-0.0194365	0.028235	31		116.5	0.311455	0.0737775	7
46	-0.0200659	0.0249611	31		117	0.316615	0.0757851	7
46.2	-0.0217829	0.0269951	31		117.5	0.310269	0.0747587	7
46.4	-0.0204775	0.0288003	31		118	0.302389	0.07015	7
46.6	-0.0221926	0.0287276	31		118.5	0.285022	0.0669784	7
46.8	-0.0208806	0.0285245	31		119	0.293136	0.0735788	7
47	-0.0219738	0.0284811	31		119.5	0.292997	0.0660482	7
47.2	-0.0226846	0.0299377	31		120	0.277872	0.0694666	7
47.4	-0.0227488	0.027836	31		120.5	0.293658	0.0685002	7
47.6	-0.0187521	0.0271076	31		121	0.297994	0.0699152	7
47.8	-0.0203125	0.029429	31		121.5	0.293373	0.0689438	7
48	-0.0209495	0.0295981	31		122	0.28736	0.0722694	7
48.2	-0.0209669	0.0288663	31		122.5	0.283114	0.0734541	7
48.4	-0.0213327	0.0267694	31		123	0.275932	0.0717585	7
48.6	-0.0210344	0.0282994	31		123.5	0.273418	0.0630267	7
48.8	-0.0193076	0.0273488	31		124	0.281424	0.0684587	7
49	-0.0226057	0.0305972	31		124.5	0.279977	0.0641306	7
49.2	-0.0235759	0.0295164	31		125	0.286836	0.0654194	7
49.4	-0.0222306	0.030167	31		125.5	0.271498	0.0680967	7
49.6	-0.0208866	0.030117	31		126	0.272742	0.0722103	7
49.8	-0.0193585	0.027895	31		126.5	0.273767	0.0714283	7
50	-0.0209482	0.0285375	31		127	0.282762	0.0718378	7
50.2	-0.0222698	0.0268969	31		127.5	0.268421	0.0714132	7
50.4	-0.0177883	0.0305797	31		128	0.269653	0.069443	7
50.6	-0.0204699	0.029488	31		128.5	0.269453	0.0756	7
50.8	-0.0205733	0.0281078	31		129	0.251382	0.0676872	7
51	-0.0217313	0.0277499	31		129.5	0.263907	0.0743037	7
51.2	-0.0182996	0.0288218	31		130	0.23608	0.0723318	7
51.4	-0.0200192	0.0302325	31		130.5	0.247689	0.0788858	7
51.6	-0.0162517	0.0297783	31		131	0.249456	0.0779068	7
51.8	-0.0177272	0.0276947	31		131.5	0.244197	0.0760904	7
52	-0.019798	0.0289424	31		132	0.238101	0.0727061	7
52.2	-0.0198034	0.0294495	31		132.5	0.248129	0.0793586	7
52.4	-0.0205006	0.0296123	31		133	0.224718	0.0819404	7
52.6	-0.0176312	0.0280555	31		133.5	0.23439	0.0811764	7
52.8	-0.0185763	0.0325354	31		134	0.209534	0.0768441	7
53	-0.0178768	0.034457	31		134.5	0.226293	0.0798478	7
53.2	-0.0190431	0.0320881	31		135	0.238062	0.0791502	7
53.4	-0.0164166	0.0308108	31		135.5	0.227673	0.0851662	7
53.6	-0.0196031	0.0324612	31		136	0.224937	0.0775283	7
53.8	-0.0162568	0.0351631	31		136.5	0.219186	0.0801108	7
54	-0.0169806	0.0313061	31		137	0.224832	0.0772699	7
54.2	-0.0163084	0.035656	31		137.5	0.224195	0.0707424	7
54.4	-0.0163363	0.0291791	31		138	0.232349	0.069762	7
54.6	-0.0192295	0.0334575	31		138.5	0.237475	0.0673806	7
54.8	-0.0224461	0.0343883	31		139	0.226051	0.0714364	7
55	-0.0199202	0.0317353	31		139.5	0.24541	0.0705626	7
55.2	-0.019313	0.0368363	31		140	0.236073	0.0711851	7
55.4	-0.0161696	0.0333831	31		140.5	0.243984	0.0630052	7
55.6	-0.0179619	0.0317056	31		141	0.242221	0.0653875	7
55.8	-0.0144669	0.0327409	31		141.5	0.22866	0.0707716	7
56	-0.0194037	0.0316316	31		142	0.237268	0.0708667	7
56.2	-0.0210415	0.0334931	31		142.5	0.241951	0.0591605	7
56.4	-0.0185898	0.0349883	31		143	0.248212	0.0688629	7
56.6	-0.0213285	0.0310125	31		143.5	0.232906	0.068221	7
56.8	-0.0186534	0.030753	31		144	0.229308	0.0683448	7
57	-0.0202494	0.0347192	31		144.5	0.235797	0.0658858	7
57.2	-0.0195994	0.0346325	31		145	0.238226	0.0712834	7
57.4	-0.015528	0.0327421	31		145.5	0.22095	0.0655868	7
57.6	-0.0160806	0.0324462	31		146	0.243767	0.0653396	7
57.8	-0.0215388	0.0352834	31		146.5	0.230283	0.0701787	7
58	-0.0178132	0.032613	31		147	0.24198	0.0647001	7
58.2	-0.0164348	0.0359381	31		147.5	0.226046	0.0650123	7
58.4	-0.0217637	0.0361231	31		148	0.235461	0.0656299	7
58.6	-0.0174979	0.0340815	31		148.5	0.233398	0.0685011	7
58.8	-0.0169576	0.0337629	31		149	0.22708	0.0658277	7
59	-0.0216205	0.0374448	31		149.5	0.234584	0.0667078	7
59.2	-0.0174956	0.0339199	31		150	0.241282	0.0662416	7
59.4	-0.0156428	0.0339391	31		150.5	0.235444	0.0644632	7
59.6	-0.0172465	0.0331054	31		151	0.23786	0.0660499	7
59.8	-0.016365	0.0338879	31		151.5	0.240508	0.0638833	7
60	-0.0152402	0.034884	31		152	0.222935	0.0654041	7
60.2	-0.0162595	0.034933	31		152.5	0.223238	0.0708722	7
60.4	-0.0199549	0.0357947	31		153	0.228364	0.0621465	7
60.6	-0.0154527	0.0346925	31		153.5	0.238839	0.0646606	7
60.8	-0.019267	0.0358045	31		154	0.237334	0.0643774	7
61	-0.0153748	0.0343204	31		154.5	0.226097	0.0648615	7
61.2	-0.0210247	0.0333319	31		155	0.226071	0.0652514	7
61.4	-0.0164296	0.0325316	31		155.5	0.225995	0.0697509	7
61.6	-0.0188757	0.0360168	31		156	0.2234	0.0646147	7
61.8	-0.017529	0.0351809	31		156.5	0.225166	0.063341	7
62	-0.0202307	0.0332829	31		157	0.236608	0.0678304	7
62.2	-0.0150085	0.0377975	31		157.5	0.238571	0.0628104	7
62.4	-0.0192845	0.0357475	31		158	0.245105	0.0677651	7
62.6	-0.0163108	0.0340546	31		158.5	0.233892	0.0617099	7
62.8	-0.0180837	0.0336508	31		159	0.222016	0.0639924	7
63	-0.018107	0.0339338	31		159.5	0.229792	0.0653457	7
63.2	-0.0194115	0.033558	31		160	0.224548	0.066269	7
63.4	-0.0177871	0.0334813	31		160.5	0.230344	0.0644281	7
63.6	-0.0179201	0.0360261	31		161	0.228729	0.0631301	7
63.8	-0.0167949	0.0360213	31		161.5	0.212097	0.0629287	7
64	-0.0205081	0.0351735	31		162	0.223116	0.0658264	7
64.2	-0.0172661	0.0360956	31		162.5	0.220783	0.0644412	7
64.4	-0.0177737	0.0357304	31		163	0.205772	0.0725158	7
64.6	-0.0178919	0.0347476	31		163.5	0.222913	0.063641	7
64.8	-0.0180738	0.0375837	31		164	0.202921	0.0682888	7
65	-0.0149589	0.0363751	31		164.5	0.208433	0.0669283	7
65.2	-0.0191738	0.0392351	31		165	0.224042	0.0675804	7
65.4	-0.0149035	0.0360031	31		165.5	0.223203	0.0696668	7
65.6	-0.0173498	0.038079	31		166	0.206005	0.0662723	7
65.8	-0.0180636	0.0383353	31		166.5	0.211339	0.067865	7
66	-0.0173575	0.0373777	31		167	0.222459	0.0655427	7
66.2	-0.0166949	0.0397004	31		167.5	0.230811	0.0624248	7
66.4	-0.0161809	0.035345	31		168	0.213691	0.0659688	7
66.6	-0.0198858	0.0372127	31		168.5	0.212311	0.0650775	7
66.8	-0.0160488	0.0362264	31		169	0.211358	0.0658433	7
67	-0.0153405	0.0383608	31		169.5	0.222572	0.0671717	7
67.2	-0.0194945	0.0396931	31		170	0.210034	0.0633128	7
67.4	-0.0193403	0.0410989	31		170.5	0.215726	0.067963	7
67.6	-0.0173428	0.039454	31		171	0.220636	0.0640271	7
67.8	-0.0168114	0.0380815	31		171.5	0.205995	0.0641889	7
68	-0.0158967	0.0396536	31		172	0.211834	0.0625872	7
68.2	-0.0154228	0.0398243	31		172.5	0.206708	0.0669549	7
68.4	-0.0152561	0.0391295	31		173	0.208892	0.0656535	7
68.6	-0.0163842	0.0396254	31		173.5	0.227718	0.0625868	7
68.8	-0.0188086	0.0428454	31		174	0.224095	0.059382	7
69	-0.0119672	0.0400701	31		174.5	0.21872	0.0623703	7
69.2	-0.0146402	0.0385859	31		175	0.227833	0.061737	7
69.4	-0.0136525	0.0406002	31		175.5	0.225624	0.0625295	7
69.6	-0.014569	0.0401024	31		176	0.220639	0.0637802	7
69.8	-0.0169185	0.0392213	31		176.5	0.223054	0.0634624	7
70	-0.0187448	0.0394219	31		177	0.208695	0.0605876	7
70.2	-0.0148649	0.0378493	31		177.5	0.213443	0.0626094	7
70.4	-0.015444	0.0374786	31		178	0.216952	0.0582612	7
70.6	-0.0176734	0.0382411	31		178.5	0.21648	0.0604769	7
70.8	-0.0123974	0.0389467	31		179	0.20857	0.0540273	7
71	-0.015656	0.0398624	31		179.5	0.215801	0.0593085	7
71.2	-0.0150655	0.0397166	31		180	0.211492	0.0631898	7
71.4	-0.0153119	0.0398797	31		180.5	0.212126	0.0556907	7
71.6	-0.0136771	0.0378804	31		181	0.199059	0.0657733	7
71.8	-0.0140352	0.040186	31		181.5	0.197768	0.0649844	7
72	-0.0153886	0.0402686	31		182	0.201374	0.0648472	7
72.2	-0.0136068	0.0413208	31		182.5	0.204638	0.0621898	7
72.4	-0.0166699	0.0407595	31		183	0.199027	0.058495	7
72.6	-0.0190273	0.0430943	31		183.5	0.199349	0.0579492	7
72.8	-0.0177809	0.041898	31		184	0.205832	0.0621954	7
73	-0.0164967	0.0429684	31		184.5	0.208075	0.0596631	7
73.2	-0.0160245	0.0442995	31		185	0.200068	0.0611606	7
73.4	-0.0149249	0.041337	31		185.5	0.213636	0.058635	7
73.6	-0.0132171	0.0402487	31		186	0.213088	0.0569773	7
73.8	-0.0135511	0.0397993	31		186.5	0.209249	0.0617816	7
74	-0.0180496	0.0422596	31		187	0.216084	0.0572606	7
74.2	-0.0137135	0.0389933	31		187.5	0.211047	0.0552107	7
74.4	-0.00963218	0.0432534	31		188	0.204032	0.0585016	7
74.6	-0.0146371	0.0403509	31		188.5	0.210851	0.0557047	7
74.8	-0.0154396	0.0383346	31		189	0.20032	0.0568596	7
75	-0.0145103	0.0393402	31		189.5	0.205185	0.0574431	7
75.2	-0.0146399	0.0409062	31		190	0.18609	0.0591123	7
75.4	-0.0176829	0.0434255	31		190.5	0.19838	0.0590498	7
75.6	-0.0130826	0.0398024	31		191	0.205981	0.0578937	7
75.8	-0.015963	0.0417996	31		191.5	0.193269	0.0625261	7
76	-0.0168412	0.0388272	31		192	0.203066	0.0576702	7
76.2	-0.0178022	0.0402098	31		192.5	0.198905	0.0602752	7
76.4	-0.0144271	0.0419741	31		193	0.197464	0.0536	7
76.6	-0.0119381	0.0419743	31		193.5	0.205212	0.0594082	7
76.8	-0.0112301	0.0420805	31		194	0.200597	0.059795	7
77	-0.0122218	0.0422303	31		194.5	0.207126	0.0642826	7
77.2	-0.0126043	0.0399638	31		195	0.193957	0.0569944	7
77.4	-0.0142895	0.0414672	31		195.5	0.210137	0.0550273	7
77.6	-0.013397	0.0434994	31		196	0.198993	0.0561193	7
77.8	-0.0136448	0.0436834	31		196.5	0.194076	0.0566185	7
78	-0.0122611	0.0431961	31		197	0.206456	0.0526031	7
78.2	-0.0125529	0.0432689	31		197.5	0.181714	0.0581348	7
78.4	-0.0128206	0.0416087	31		198	0.197353	0.0593094	7
78.6	-0.0150052	0.043128	31		198.5	0.190182	0.062722	7
78.8	-0.0132378	0.0412651	31		199	0.200191	0.0601876	7
79	-0.0153787	0.0420193	31		199.5	0.197716	0.0558834	7
79.2	-0.0161396	0.041734	31		200	0.18789	0.0576258	7
79.4	-0.0182015	0.0413366	31		200.5	0.195975	0.0544893	7
79.6	-0.0188187	0.0428647	31		201	0.190142	0.0589935	7
79.8	-0.0175642	0.0401411	31		201.5	0.184248	0.0540934	7
80	-0.0172594	0.0430047	31		202	0.186156	0.0607737	7
80.2	-0.0194787	0.0417019	31		202.5	0.186826	0.0497499	7
80.4	-0.0203605	0.0420777	31		203	0.188877	0.0618716	7
80.6	-0.0233424	0.0415559	31		203.5	0.183464	0.0587706	7
80.8	-0.0223552	0.04243	31		204	0.1826	0.0547589	7
81	-0.0241356	0.0424735	31		204.5	0.19668	0.0539282	7
81.2	-0.0202809	0.0426328	31		205	0.192022	0.0562727	7
81.4	-0.0232229	0.0446367	31		205.5	0.196915	0.0555838	7
81.6	-0.0236129	0.0453446	31		206	0.203297	0.0547603	7
81.8	-0.0232146	0.0427574	31		206.5	0.202692	0.0579652	7
82	-0.0270886	0.0416641	31		207	0.1969	0.0549292	7
82.2	-0.0240269	0.0413805	31		207.5	0.199399	0.060098	7
82.4	-0.025178	0.0428278	31		208	0.186115	0.0592148	7
82.6	-0.0235821	0.0444372	31		208.5	0.179857	0.0524446	7
82.8	-0.0241011	0.0425615	31		209	0.197565	0.0547707	7
83	-0.0236373	0.044777	31		209.5	0.189373	0.0519614	7
83.2	-0.025918	0.046308	31		210	0.180339	0.0551465	7
83.4	-0.0228348	0.0445622	31		210.5	0.193439	0.0578178	7
83.6	-0.0229787	0.0433987	31		211	0.182046	0.0551663	7
83.8	-0.0263409	0.043825	31		211.5	0.195471	0.0543176	7
84	-0.0217589	0.0397966	31		212	0.190415	0.0532458	7
84.2	-0.025579	0.0457148	31		212.5	0.194526	0.0553847	7
84.4	-0.022816	0.0408387	31		213	0.194387	0.054018	7
84.6	-0.0265189	0.0439017	31		213.5	0.187096	0.0548054	7
84.8	-0.0248326	0.0434776	31		214	0.194572	0.051539	7
85	-0.025041	0.0428307	31		214.5	0.192218	0.0504931	7
85.2	-0.0308001	0.0448231	31		215	0.207581	0.0512055	7
85.4	-0.0269813	0.0462874	31		215.5	0.19523	0.0524183	7
85.6	-0.0252328	0.0475545	31		216	0.193084	0.0493429	7
85.8	-0.0274649	0.0465352	31		216.5	0.195999	0.0485377	7
86	-0.0246206	0.0447826	31		217	0.196856	0.0496542	7
86.2	-0.028001	0.0497484	31		217.5	0.206309	0.0457779	7
86.4	-0.0280119	0.0493783	31		218	0.200673	0.0491383	7
86.6	-0.0286454	0.0472458	31		218.5	0.20183	0.0552414	7
86.8	-0.0263107	0.0466114	31		219	0.191868	0.0511974	7
87	-0.0344822	0.05026	31		219.5	0.192599	0.054607	7
87.2	-0.0309499	0.0495702	31		220	0.206219	0.0515873	7
87.4	-0.0342395	0.050065	31		220.5	0.187652	0.0569958	7
87.6	-0.030169	0.0520672	31		221	0.194397	0.0599628	7
87.8	-0.0307059	0.0519613	31		221.5	0.182474	0.0523677	7
88	-0.0352608	0.0491942	31		222	0.17083	0.0595741	7
88.2	-0.0327198	0.0492673	31		222.5	0.183754	0.0594379	7
88.4	-0.0358186	0.0473061	31		223	0.178097	0.0545435	7
88.6	-0.0340364	0.0496155	31		223.5	0.17101	0.0579656	7
88.8	-0.0325242	0.0454045	31		224	0.172397	0.0583937	7
89	-0.0361586	0.0462722	31		224.5	0.168965	0.0580065	7
89.2	-0.0319173	0.0484261	31		225	0.175455	0.05996	7
89.4	-0.0323424	0.0505397	31		225.5	0.177893	0.0614489	7
89.6	-0.0344634	0.0464784	31		226	0.179275	0.0639915	7
89.8	-0.0346634	0.0473565	31		226.5	0.18068	0.0631831	7
90	-0.0334201	0.048751	31		227	0.170211	0.062693	7
90.2	-0.0352458	0.0499895	31		227.5	0.165642	0.0626086	7
90.4	-0.0366754	0.0502052	31		228	0.169181	0.0631276	7
90.6	-0.0350251	0.0513648	31		228.5	0.155303	0.0627028	7
90.8	-0.0395105	0.0502522	31		229	0.172963	0.0629296	7
91	-0.0356179	0.0505379	31		229.5	0.173027	0.0602451	7
91.2	-0.0380134	0.0512703	31		230	0.165053	0.058506	7
91.4	-0.03671	0.053228	31		230.5	0.17068	0.0596457	7
91.6	-0.0390428	0.052183	31		231	0.167408	0.0604613	7
91.8	-0.0353864	0.0524143	31		231.5	0.169278	0.0599175	7
92	-0.036959	0.0513477	31		232	0.159654	0.0595075	7
92.2	-0.0377536	0.0508634	31		232.5	0.157648	0.0624502	7
92.4	-0.0368217	0.0543857	31		233	0.170181	0.0613753	7
92.6	-0.0385027	0.0543834	31		233.5	0.159838	0.0557984	7
92.8	-0.0343514	0.0520195	31		234	0.160804	0.0582829	7
93	-0.0335208	0.0480852	31		234.5	0.150778	0.0616632	7
93.2	-0.0333217	0.0491718	31		235	0.160365	0.0560232	7
93.4	-0.0319709	0.0500598	31		235.5	0.15956	0.0542215	7
93.6	-0.0308112	0.0505105	31		236	0.172185	0.0595493	7
93.8	-0.0281063	0.0478979	31		236.5	0.153824	0.0575832	7
94	-0.0308687	0.050409	31		237	0.15744	0.061398	7
94.2	-0.028129	0.04812	31		237.5	0.154827	0.0600196	7
94.4	-0.028951	0.0473639	31		238	0.157422	0.0588388	7
94.6	-0.0289534	0.0454104	31		238.5	0.14871	0.0646964	7
94.8	-0.0290855	0.0456888	31		239	0.15549	0.0589684	7
95	-0.0281064	0.0481972	31		239.5	0.159135	0.0612788	7
95.2	-0.0236479	0.0447445	31		240	0.159642	0.0612685	7
95.4	-0.0221545	0.0469585	31		240.5	0.154236	0.0620827	7
95.6	-0.0272607	0.04687	31		241	0.150344	0.0582276	7
95.8	-0.0251698	0.045241	31		241.5	0.153642	0.0637363	7
96	-0.0218535	0.0449465	31		242	0.145611	0.0625127	7
96.2	-0.023291	0.0446746	31		242.5	0.163924	0.0620851	7
96.4	-0.0218391	0.0458072	31		243	0.160796	0.0625471	7
96.6	-0.0258712	0.0448359	31		243.5	0.156713	0.0614887	7
96.8	-0.0227495	0.0471705	31		244	0.160693	0.0605924	7
97	-0.024072	0.0457012	31		244.5	0.16583	0.0588028	7
97.2	-0.0215838	0.046369	31		245	0.155749	0.0639847	7
97.4	-0.0226821	0.0445672	31		245.5	0.137126	0.0638378	7
97.6	-0.020505	0.0445053	31		246	0.152435	0.059846	7
97.8	-0.0206916	0.0477335	31		246.5	0.154769	0.061084	7
98	-0.0196019	0.0473163	31		247	0.15066	0.0630625	7
98.2	-0.0227655	0.0480281	31		247.5	0.143708	0.0586356	7
98.4	-0.0190544	0.0457904	31		248	0.14891	0.0599553	7
98.6	-0.0202598	0.0479834	31		248.5	0.150133	0.0629262	7
98.8	-0.0222383	0.0483342	31		249	0.139381	0.0592001	7
99	-0.0226698	0.0451194	31		249.5	0.146171	0.0582083	7
99.2	-0.0248629	0.0486883	31		250	0.143499	0.0582233	7
99.4	-0.0211079	0.0462203	31		250.5	0.155599	0.0518877	7
99.6	-0.0227965	0.0460241	31		251	0.13816	0.0534885	7
99.8	-0.0237287	0.0458893	31		251.5	0.151634	0.0623368	7
100	-0.0229006	0.0460842	31		252	0.147134	0.0616752	7
100.2	-0.0216375	0.0461605	31		252.5	0.132933	0.0600577	7
100.4	-0.0230669	0.0440764	31		253	0.138234	0.0619349	7
100.6	-0.022079	0.0458494	31		253.5	0.136185	0.0627877	7
100.8	-0.0233723	0.0468584	31		254	0.129308	0.0626772	7
101	-0.022426	0.0483918	31		254.5	0.132433	0.0619812	7
101.2	-0.02596	0.0431044	31		255	0.127744	0.0607128	7
101.4	-0.0201266	0.0437847	31		255.5	0.134268	0.0629264	7
101.6	-0.0246923	0.046192	31		256	0.127209	0.0643217	7
101.8	-0.0233224	0.0446322	31		256.5	0.133277	0.0620165	7
102	-0.021909	0.0446926	31		257	0.135451	0.0611765	7
102.2	-0.0228641	0.0459369	31		257.5	0.130638	0.06279	7
102.4	-0.0238394	0.0451485	31		258	0.138501	0.0618268	7
102.6	-0.023188	0.0465091	31		258.5	0.13979	0.063165	7
102.8	-0.0230502	0.0456591	31		259	0.140259	0.0601081	7
103	-0.0221899	0.0475011	31		259.5	0.151505	0.0599112	7
103.2	-0.021822	0.0452123	31		260	0.150537	0.0568259	7
103.4	-0.0232603	0.0475704	31		260.5	0.148535	0.0593752	7
103.6	-0.0254813	0.0486355	31		261	0.151478	0.0587982	7
103.8	-0.0234825	0.0479529	31		261.5	0.140033	0.0621468	7
104	-0.024653	0.0455248	31		262	0.137084	0.0620759	7
104.2	-0.0239211	0.0450793	31		262.5	0.142411	0.0600251	7
104.4	-0.0220316	0.0446744	31		263	0.135755	0.0611571	7
104.6	-0.0237266	0.0470005	31		263.5	0.13646	0.0599518	7
104.8	-0.0247981	0.046102	31		264	0.143912	0.0561562	7
105	-0.0284835	0.0472217	31		264.5	0.13962	0.0633498	7
105.2	-0.0252268	0.0437756	31		265	0.141071	0.0615978	7
105.4	-0.0267623	0.046796	31		265.5	0.137647	0.0592943	7
105.6	-0.0259366	0.0474444	31		266	0.148849	0.0603716	7
105.8	-0.0262357	0.0457905	31		266.5	0.148773	0.057755	7
106	-0.0276815	0.0460709	31		267	0.132015	0.0590183	7
106.2	-0.0261648	0.0476755	31		267.5	0.136746	0.0663766	7
106.4	-0.0257079	0.047822	31		268	0.134395	0.0656958	7
106.6	-0.0288764	0.0497118	31		268.5	0.125076	0.0683089	7
106.8	-0.0285031	0.0493939	31		269	0.132555	0.060453	7
107	-0.0272462	0.0478948	31		269.5	0.139216	0.0644073	7
107.2	-0.0231329	0.0483691	31		270	0.133591	0.0619678	7
107.4	-0.0273765	0.0485076	31		270.5	0.132839	0.0624073	7
107.6	-0.0258545	0.0473064	31		271	0.142723	0.0652406	7
107.8	-0.0287727	0.0452803	31		271.5	0.120339	0.0669759	7
108	-0.0263046	0.0455253	31		272	0.131259	0.0622931	7
108.2	-0.02658	0.0476226	31		272.5	0.121073	0.0622952	7
108.4	-0.0271138	0.0466218	31		273	0.127547	0.0587531	7
108.6	-0.0258944	0.046398	31		273.5	0.117548	0.062193	7
108.8	-0.0265905	0.0447042	31		274	0.123336	0.0576014	7
109	-0.0288338	0.046093	31		274.5	0.120443	0.0604429	7
109.2	-0.028589	0.0461653	31		275	0.133747	0.0634585	7
109.4	-0.0265843	0.047421	31		275.5	0.130605	0.0634324	7
109.6	-0.0287692	0.0457517	31		276	0.136107	0.0628311	7
109.8	-0.0283892	0.0449249	31		276.5	0.121891	0.0601673	7
110	-0.0285694	0.0463523	31		277	0.12205	0.0570091	7
110.2	-0.0283235	0.0463498	31		277.5	0.113431	0.0589919	7
110.4	-0.024343	0.0456254	31		278	0.126026	0.0592249	7
110.6	-0.031038	0.0464984	31		278.5	0.131464	0.0595985	7
110.8	-0.0272314	0.0439281	31		279	0.127775	0.0606292	7
111	-0.0269863	0.0449827	31		279.5	0.122944	0.0599292	7
111.2	-0.0311125	0.0439194	31		280	0.123564	0.0571278	7
111.4	-0.0259124	0.0441632	31		280.5	0.125421	0.0595818	7
111.6	-0.0248423	0.0459675	31		281	0.131927	0.058907	7
111.8	-0.0302601	0.0457472	31		281.5	0.131007	0.0593958	7
112	-0.0305798	0.043521	31		282	0.131822	0.0611868	7
112.2	-0.029009	0.0449203	31		282.5	0.130444	0.0594295	7
112.4	-0.0309962	0.0458624	31		283	0.13152	0.0604349	7
112.6	-0.0267141	0.0459142	31		283.5	0.129406	0.0611043	7
112.8	-0.0274906	0.0465034	31		284	0.116753	0.0539442	7
113	-0.0272241	0.0459938	31		284.5	0.12492	0.053297	7
113.2	-0.0308505	0.0450047	31		285	0.127157	0.0542075	7
113.4	-0.0291578	0.0465312	31		285.5	0.130926	0.0544081	7
113.6	-0.0273511	0.0492546	31		286	0.129652	0.0565354	7
113.8	-0.0300234	0.0485735	31		286.5	0.146343	0.0536565	7
114	-0.0249487	0.0474918	31		287	0.135389	0.0553286	7
114.2	-0.030903	0.0480652	31		287.5	0.11198	0.0522456	7
114.4	-0.0308546	0.0477011	31		288	0.127872	0.0551003	7
114.6	-0.028323	0.0461674	31		288.5	0.125107	0.0513445	7
114.8	-0.0305759	0.0509569	31		289	0.136694	0.0559941	7
115	-0.0294018	0.045931	31		289.5	0.138621	0.0575355	7
					290	0.127639	0.0546475	7
					290.5	0.136905	0.055199	7
					291	0.134858	0.0571931	7
					291.5	0.136292	0.0555218	7
					292	0.127075	0.0546449	7
					292.5	0.129036	0.053324	7
					293	0.134115	0.0552775	7
					293.5	0.135696	0.056137	7
					294	0.132995	0.0515948	7
					294.5	0.127645	0.0545902	7
					295	0.12869	0.0554964	7
					295.5	0.124024	0.0564528	7
					296	0.129451	0.0553129	7
					296.5	0.114608	0.0557401	7
					297	0.129081	0.056205	7
					297.5	0.119959	0.0574956	7
					298	0.121583	0.0554577	7
					298.5	0.118255	0.0611369	7
					299	0.130232	0.0529616	7
					299.5	0.112497	0.056313	7
					300	0.12519	0.0555688	7

## Sheet: Figure 1-figure sup 1C-Ci
Figure 1-figure supplement 1C
	mitoGCaMP3 AVG 7 cells					Baseline-corrected of cytoGCaMP3
Time (s)	Mean	SEM	n		Time (s)	Mean	SEM	n
-2.5	0.024228	0.00854717	7		-1.8	0.0135371	0.0091879	31
-2	0.0260913	0.00513519	7		-1.6	0.00878824	0.0101767	31
-1.5	0.0164256	0.00483871	7		-1.4	0.00532176	0.0077994	31
-1	0.025859	0.00837196	7		-1.2	-0.000299236	0.00690816	31
-0.5	0.0177913	0.00576108	7		-1	0.00246748	0.00674052	31
0	-0.00431118	0.00990663	7		-0.8	-0.00472355	0.00665497	31
0.5	0.023217	0.0297387	7		-0.6	-0.00650759	0.0074376	31
1	0.139956	0.0607824	7		-0.4	-0.00973177	0.00879293	31
1.5	0.278356	0.0840018	7		-0.2	-0.00885246	0.00963485	31
2	0.418416	0.113302	7		0	-0.0109378	0.0100196	31
2.5	0.5122	0.119103	7		0.2	0.000796438	0.02121	31
3	0.516428	0.124951	7		0.4	0.0129952	0.0360909	31
3.5	0.527026	0.126041	7		0.6	0.0193711	0.0465146	31
4	0.521678	0.121213	7		0.8	0.0282886	0.0662721	31
4.5	0.514323	0.121698	7		1	0.0540762	0.121742	31
5	0.515743	0.123711	7		1.2	0.0841948	0.192483	31
5.5	0.508578	0.121223	7		1.4	0.132873	0.251662	31
6	0.491651	0.121624	7		1.6	0.185515	0.304685	31
6.5	0.500257	0.116883	7		1.8	0.248473	0.36253	31
7	0.500076	0.115163	7		2	0.323918	0.427785	31
7.5	0.493254	0.115263	7		2.2	0.348544	0.418688	31
8	0.492414	0.109106	7		2.4	0.314233	0.350683	31
8.5	0.499307	0.11234	7		2.6	0.275905	0.292614	31
9	0.489987	0.110059	7		2.8	0.246883	0.245438	31
9.5	0.479448	0.103741	7		3	0.226661	0.210841	31
10	0.48503	0.110123	7		3.2	0.209982	0.185424	31
10.5	0.491518	0.109411	7		3.4	0.195966	0.164004	31
11	0.473965	0.110212	7		3.6	0.187458	0.153843	31
11.5	0.464161	0.10872	7		3.8	0.18025	0.139859	31
12	0.476526	0.11006	7		4	0.174022	0.134451	31
12.5	0.453333	0.104511	7		4.2	0.165233	0.125361	31
13	0.459219	0.110805	7		4.4	0.157361	0.120584	31
13.5	0.463125	0.106378	7		4.6	0.149448	0.115597	31
14	0.482106	0.108713	7		4.8	0.13607	0.113361	31
14.5	0.464319	0.115587	7		5	0.145133	0.104184	31
15	0.467073	0.11184	7		5.2	0.140721	0.100881	31
15.5	0.469217	0.112399	7		5.4	0.131274	0.0955744	31
16	0.464115	0.112739	7		5.6	0.125307	0.0936619	31
16.5	0.471095	0.10612	7		5.8	0.119099	0.0879661	31
17	0.440559	0.113457	7		6	0.113813	0.0861019	31
17.5	0.452044	0.109344	7		6.2	0.110739	0.0859143	31
18	0.456374	0.110177	7		6.4	0.105066	0.0812093	31
18.5	0.467495	0.106191	7		6.6	0.106674	0.0774995	31
19	0.453792	0.101457	7		6.8	0.100139	0.0771152	31
19.5	0.461135	0.103105	7		7	0.0965693	0.0746533	31
20	0.459837	0.0987672	7		7.2	0.0908454	0.0748832	31
20.5	0.46962	0.100477	7		7.4	0.0857475	0.0735097	31
21	0.46074	0.096912	7		7.6	0.0835475	0.0721098	31
21.5	0.44968	0.0953314	7		7.8	0.0797383	0.0701853	31
22	0.442075	0.0966129	7		8	0.0791375	0.0698784	31
22.5	0.453077	0.0975355	7		8.2	0.075666	0.0682792	31
23	0.466016	0.0985799	7		8.4	0.0730942	0.0680901	31
23.5	0.461988	0.0974349	7		8.6	0.0715914	0.0681509	31
24	0.440299	0.0945627	7		8.8	0.0691538	0.0660957	31
24.5	0.452468	0.0988843	7		9	0.0663279	0.0647109	31
25	0.44453	0.0996099	7		9.2	0.0642563	0.0646585	31
25.5	0.4528	0.0981777	7		9.4	0.0587979	0.0624438	31
26	0.457523	0.100982	7		9.6	0.06044	0.0653356	31
26.5	0.448748	0.0993823	7		9.8	0.0540149	0.0624699	31
27	0.442427	0.0999279	7		10	0.0528431	0.0627972	31
27.5	0.451139	0.0994334	7		10.2	0.0525434	0.0578987	31
28	0.434687	0.0949797	7		10.4	0.0476957	0.0596586	31
28.5	0.447571	0.0989453	7		10.6	0.0444986	0.0586539	31
29	0.441241	0.0998791	7		10.8	0.0446393	0.0580201	31
29.5	0.452492	0.0963773	7		11	0.0398375	0.0552893	31
30	0.444366	0.0979211	7		11.2	0.0390802	0.0555129	31
30.5	0.426733	0.0973455	7		11.4	0.0347452	0.0529861	31
31	0.422968	0.0987955	7		11.6	0.0329971	0.0535899	31
31.5	0.427927	0.0897769	7		11.8	0.0336692	0.0516647	31
32	0.422418	0.0949203	7		12	0.0327139	0.0529122	31
32.5	0.428394	0.0911911	7		12.2	0.0286312	0.0510301	31
33	0.411275	0.0923271	7		12.4	0.0259172	0.0513325	31
33.5	0.408801	0.0917795	7		12.6	0.0245113	0.0501987	31
34	0.412174	0.0920384	7		12.8	0.0223251	0.0495081	31
34.5	0.420631	0.0991568	7		13	0.0238512	0.0509518	31
35	0.407178	0.0952108	7		13.2	0.0206348	0.0502311	31
35.5	0.408365	0.0890551	7		13.4	0.021948	0.0447193	31
36	0.409513	0.0924975	7		13.6	0.016606	0.0480462	31
36.5	0.41697	0.0975546	7		13.8	0.0177385	0.0458998	31
37	0.423402	0.093072	7		14	0.0157361	0.0453288	31
37.5	0.418123	0.087448	7		14.2	0.0135928	0.0456687	31
38	0.423453	0.0903214	7		14.4	0.0124391	0.0443856	31
38.5	0.421602	0.0886331	7		14.6	0.0118829	0.0426526	31
39	0.413373	0.0975398	7		14.8	0.0113617	0.0434835	31
39.5	0.415646	0.0930162	7		15	0.00759033	0.0431535	31
40	0.41796	0.0829456	7		15.2	0.00757119	0.0409574	31
40.5	0.40733	0.090235	7		15.4	0.0048595	0.042499	31
41	0.411838	0.0870901	7		15.6	0.00470693	0.039025	31
41.5	0.415321	0.086176	7		15.8	0.00483178	0.0414136	31
42	0.425292	0.0905092	7		16	0.00479256	0.0392708	31
42.5	0.411226	0.0899161	7		16.2	0.00379385	0.0379872	31
43	0.406945	0.086405	7		16.4	-0.000647302	0.0397141	31
43.5	0.401235	0.0856934	7		16.6	0.00170289	0.0411174	31
44	0.397569	0.082404	7		16.8	0.000562946	0.0371396	31
44.5	0.394595	0.0861999	7		17	-0.0045257	0.0397269	31
45	0.39672	0.0880129	7		17.2	0.00201045	0.0376576	31
45.5	0.407031	0.0838263	7		17.4	-0.00262523	0.0371388	31
46	0.387102	0.0865177	7		17.6	-0.000328956	0.0352064	31
46.5	0.39432	0.0856186	7		17.8	-0.00421599	0.0359615	31
47	0.382643	0.0909553	7		18	0.000112007	0.0343339	31
47.5	0.383634	0.0875306	7		18.2	-0.00141442	0.0349302	31
48	0.383316	0.0889445	7		18.4	-0.00210592	0.0368309	31
48.5	0.382877	0.092033	7		18.6	-0.00699921	0.0368119	31
49	0.386732	0.0876436	7		18.8	-0.00577183	0.0335586	31
49.5	0.39258	0.0924611	7		19	-0.00280863	0.0355463	31
50	0.391713	0.0840217	7		19.2	-0.00455329	0.0335889	31
50.5	0.383223	0.087687	7		19.4	-0.00853919	0.0357873	31
51	0.378847	0.0923615	7		19.6	-0.00688293	0.0348477	31
51.5	0.374094	0.0833942	7		19.8	-0.00471249	0.0327105	31
52	0.38107	0.086525	7		20	-0.00355425	0.0310454	31
52.5	0.379579	0.0868646	7		20.2	-0.00565025	0.0308893	31
53	0.385038	0.0895021	7		20.4	-0.00791533	0.0342661	31
53.5	0.367476	0.0850673	7		20.6	-0.00402568	0.0306576	31
54	0.390713	0.0842203	7		20.8	-0.00558917	0.0344927	31
54.5	0.365921	0.0887159	7		21	-0.00808396	0.0296832	31
55	0.382438	0.0869934	7		21.2	-0.00577222	0.0296367	31
55.5	0.379518	0.0825827	7		21.4	-0.00860505	0.0335958	31
56	0.363027	0.0797801	7		21.6	-0.0111935	0.0298006	31
56.5	0.376972	0.0830262	7		21.8	-0.0100285	0.0294789	31
57	0.359589	0.0792828	7		22	-0.010897	0.0314006	31
57.5	0.355042	0.0792227	7		22.2	-0.0130337	0.0311373	31
58	0.365611	0.083953	7		22.4	-0.0137158	0.0306681	31
58.5	0.375925	0.0788281	7		22.6	-0.0130949	0.0311559	31
59	0.370584	0.0810064	7		22.8	-0.0124711	0.030967	31
59.5	0.369666	0.0806939	7		23	-0.0128654	0.0328204	31
60	0.35953	0.0802544	7		23.2	-0.0123034	0.0354551	31
60.5	0.35394	0.0830714	7		23.4	-0.0169191	0.0308465	31
61	0.366103	0.0878597	7		23.6	-0.0142473	0.0305379	31
61.5	0.358004	0.0825873	7		23.8	-0.0151651	0.0281463	31
62	0.356757	0.0824891	7		24	-0.0174136	0.0316064	31
62.5	0.347892	0.0799707	7		24.2	-0.0167898	0.030578	31
63	0.354981	0.081866	7		24.4	-0.0161562	0.0286156	31
63.5	0.353941	0.0795605	7		24.6	-0.0182584	0.0303769	31
64	0.345891	0.0885193	7		24.8	-0.016453	0.030592	31
64.5	0.346742	0.0904186	7		25	-0.0175569	0.0280582	31
65	0.345273	0.0844122	7		25.2	-0.018114	0.0307852	31
65.5	0.332733	0.082175	7		25.4	-0.0186585	0.0297194	31
66	0.33999	0.0857576	7		25.6	-0.0177199	0.0307796	31
66.5	0.323414	0.0777076	7		25.8	-0.0168073	0.0325724	31
67	0.338863	0.0802119	7		26	-0.0210672	0.0291381	31
67.5	0.348849	0.0770452	7		26.2	-0.0197664	0.0310013	31
68	0.333715	0.079122	7		26.4	-0.0192504	0.0290792	31
68.5	0.348525	0.0841945	7		26.6	-0.0197238	0.0294146	31
69	0.336671	0.0798563	7		26.8	-0.0204118	0.031698	31
69.5	0.340699	0.0840986	7		27	-0.015208	0.0310916	31
70	0.341329	0.077691	7		27.2	-0.0208713	0.0289234	31
70.5	0.351358	0.0826546	7		27.4	-0.0185604	0.0305098	31
71	0.338502	0.0801326	7		27.6	-0.0197789	0.0301376	31
71.5	0.332437	0.0761336	7		27.8	-0.0209986	0.0291786	31
72	0.340877	0.0793802	7		28	-0.0224155	0.0280031	31
72.5	0.343478	0.08387	7		28.2	-0.0170678	0.0313794	31
73	0.33782	0.0878835	7		28.4	-0.021669	0.0323879	31
73.5	0.342527	0.0793119	7		28.6	-0.0179374	0.0322996	31
74	0.342286	0.0804712	7		28.8	-0.021173	0.0329378	31
74.5	0.340022	0.075206	7		29	-0.0204797	0.0323427	31
75	0.345081	0.0794657	7		29.2	-0.0223301	0.0323839	31
75.5	0.339624	0.0793722	7		29.4	-0.0201066	0.0315319	31
76	0.333954	0.0761692	7		29.6	-0.0201891	0.0289176	31
76.5	0.325745	0.0829773	7		29.8	-0.0217894	0.0329685	31
77	0.333689	0.0789093	7		30	-0.0192745	0.0341381	31
77.5	0.331931	0.0803038	7		30.2	-0.0212438	0.0297569	31
78	0.319674	0.08154	7		30.4	-0.0172339	0.0330438	31
78.5	0.325202	0.0788369	7		30.6	-0.0245532	0.0312093	31
79	0.307473	0.0836769	7		30.8	-0.0202938	0.0319262	31
79.5	0.325137	0.0792555	7		31	-0.0205706	0.0306343	31
80	0.323349	0.0869871	7		31.2	-0.0175553	0.0288146	31
80.5	0.323073	0.0804518	7		31.4	-0.0202392	0.0315164	31
81	0.312075	0.0834239	7		31.6	-0.0158388	0.0278819	31
81.5	0.315501	0.0815395	7		31.8	-0.022155	0.0298642	31
82	0.325884	0.0892542	7		32	-0.0204024	0.0306459	31
82.5	0.33494	0.0852294	7		32.2	-0.0199136	0.0288574	31
83	0.323116	0.0821171	7		32.4	-0.0209541	0.029503	31
83.5	0.310171	0.0791505	7		32.6	-0.01794	0.0292665	31
84	0.319432	0.0802901	7		32.8	-0.020713	0.030844	31
84.5	0.324823	0.0769066	7		33	-0.0220908	0.0296529	31
85	0.312898	0.0716909	7		33.2	-0.0207014	0.0290678	31
85.5	0.327225	0.0815439	7		33.4	-0.0202294	0.0277735	31
86	0.319935	0.077158	7		33.6	-0.0185487	0.0297104	31
86.5	0.315147	0.0715231	7		33.8	-0.0222552	0.0295391	31
87	0.306006	0.0751284	7		34	-0.0211804	0.0291185	31
87.5	0.305355	0.0731709	7		34.2	-0.0178599	0.0266605	31
88	0.300845	0.0702096	7		34.4	-0.0175166	0.0270924	31
88.5	0.309479	0.0725724	7		34.6	-0.0185918	0.0261254	31
89	0.320097	0.0742711	7		34.8	-0.0194928	0.0311808	31
89.5	0.316363	0.0789127	7		35	-0.019636	0.0294701	31
90	0.305381	0.0685454	7		35.2	-0.017646	0.0262459	31
90.5	0.294693	0.074676	7		35.4	-0.0181099	0.0279268	31
91	0.311916	0.0729937	7		35.6	-0.0201318	0.0263973	31
91.5	0.309716	0.0744351	7		35.8	-0.018958	0.0281943	31
92	0.295001	0.0740398	7		36	-0.0207213	0.0264162	31
92.5	0.29886	0.0756515	7		36.2	-0.0176721	0.0284634	31
93	0.30163	0.0738349	7		36.4	-0.0247269	0.0279663	31
93.5	0.30367	0.073762	7		36.6	-0.0257699	0.0278669	31
94	0.297419	0.0711425	7		36.8	-0.0221753	0.0274276	31
94.5	0.295721	0.0725045	7		37	-0.0228084	0.0274875	31
95	0.292015	0.0711863	7		37.2	-0.0222287	0.0265502	31
95.5	0.286839	0.0749422	7		37.4	-0.022087	0.0302718	31
96	0.283324	0.0709607	7		37.6	-0.0240538	0.0281775	31
96.5	0.289893	0.0713336	7		37.8	-0.023236	0.0309214	31
97	0.301586	0.0750425	7		38	-0.0228823	0.0298286	31
97.5	0.300169	0.0643044	7		38.2	-0.0226396	0.0285801	31
98	0.292893	0.0698609	7		38.4	-0.022483	0.0313357	31
98.5	0.290207	0.0702819	7		38.6	-0.0251355	0.0295069	31
99	0.279039	0.072678	7		38.8	-0.0220233	0.0287774	31
99.5	0.26998	0.0751789	7		39	-0.0225021	0.0296089	31
100	0.289255	0.0688679	7		39.2	-0.0239265	0.0320645	31
100.5	0.293153	0.0717804	7		39.4	-0.022807	0.0329836	31
101	0.291631	0.066645	7		39.6	-0.0242435	0.0304303	31
101.5	0.29576	0.0682678	7		39.8	-0.0201199	0.030811	31
102	0.282625	0.0695776	7		40	-0.02285	0.031172	31
102.5	0.302385	0.0664105	7		40.2	-0.0222371	0.0306054	31
103	0.282423	0.0677809	7		40.4	-0.0229789	0.0334859	31
103.5	0.287786	0.0662999	7		40.6	-0.0227191	0.0326276	31
104	0.284179	0.0652035	7		40.8	-0.018536	0.0286573	31
104.5	0.27679	0.0728919	7		41	-0.0206474	0.0308871	31
105	0.268261	0.0728027	7		41.2	-0.0249272	0.0294074	31
105.5	0.278951	0.0755714	7		41.4	-0.0231753	0.0244202	31
106	0.286428	0.0713953	7		41.6	-0.0205369	0.0263901	31
106.5	0.275481	0.0761341	7		41.8	-0.0218727	0.0256982	31
107	0.280681	0.0732737	7		42	-0.0237112	0.0277061	31
107.5	0.284854	0.0783969	7		42.2	-0.0198458	0.0255895	31
108	0.280437	0.0692029	7		42.4	-0.0218087	0.0257621	31
108.5	0.275259	0.0698119	7		42.6	-0.0204888	0.0267166	31
109	0.266186	0.0711417	7		42.8	-0.0230856	0.0279035	31
109.5	0.284	0.0664657	7		43	-0.0213605	0.0276384	31
110	0.281272	0.0661012	7		43.2	-0.0190559	0.0252821	31
110.5	0.282245	0.07249	7		43.4	-0.0232406	0.0261871	31
111	0.276621	0.0741183	7		43.6	-0.0249288	0.0257122	31
111.5	0.289713	0.0685301	7		43.8	-0.0217853	0.027478	31
112	0.288847	0.0741972	7		44	-0.0189364	0.0267423	31
112.5	0.290689	0.0724566	7		44.2	-0.0223246	0.0284954	31
113	0.290436	0.0707032	7		44.4	-0.0210507	0.0262739	31
113.5	0.295678	0.0710402	7		44.6	-0.0186807	0.0303618	31
114	0.294578	0.0696422	7		44.8	-0.0180451	0.0263549	31
114.5	0.301088	0.0731668	7		45	-0.0220859	0.0263616	31
115	0.316954	0.0673824	7		45.2	-0.0226444	0.0290101	31
115.5	0.296761	0.0676326	7		45.4	-0.0240916	0.0279925	31
116	0.317174	0.0754002	7		45.6	-0.0212823	0.0280769	31
116.5	0.311455	0.0737775	7		45.8	-0.0194365	0.028235	31
117	0.316615	0.0757851	7		46	-0.0200659	0.0249611	31
117.5	0.310269	0.0747587	7		46.2	-0.0217829	0.0269951	31
118	0.302389	0.07015	7		46.4	-0.0204775	0.0288003	31
118.5	0.285022	0.0669784	7		46.6	-0.0221926	0.0287276	31
119	0.293136	0.0735788	7		46.8	-0.0208806	0.0285245	31
119.5	0.292997	0.0660482	7		47	-0.0219738	0.0284811	31
120	0.277872	0.0694666	7		47.2	-0.0226846	0.0299377	31
120.5	0.293658	0.0685002	7		47.4	-0.0227488	0.027836	31
121	0.297994	0.0699152	7		47.6	-0.0187521	0.0271076	31
121.5	0.293373	0.0689438	7		47.8	-0.0203125	0.029429	31
122	0.28736	0.0722694	7		48	-0.0209495	0.0295981	31
122.5	0.283114	0.0734541	7		48.2	-0.0209669	0.0288663	31
123	0.275932	0.0717585	7		48.4	-0.0213327	0.0267694	31
123.5	0.273418	0.0630267	7		48.6	-0.0210344	0.0282994	31
124	0.281424	0.0684587	7		48.8	-0.0193076	0.0273488	31
124.5	0.279977	0.0641306	7		49	-0.0226057	0.0305972	31
125	0.286836	0.0654194	7		49.2	-0.0235759	0.0295164	31
125.5	0.271498	0.0680967	7		49.4	-0.0222306	0.030167	31
126	0.272742	0.0722103	7		49.6	-0.0208866	0.030117	31
126.5	0.273767	0.0714283	7		49.8	-0.0193585	0.027895	31
127	0.282762	0.0718378	7		50	-0.0209482	0.0285375	31
127.5	0.268421	0.0714132	7		50.2	-0.0222698	0.0268969	31
128	0.269653	0.069443	7		50.4	-0.0177883	0.0305797	31
128.5	0.269453	0.0756	7		50.6	-0.0204699	0.029488	31
129	0.251382	0.0676872	7		50.8	-0.0205733	0.0281078	31
129.5	0.263907	0.0743037	7		51	-0.0217313	0.0277499	31
130	0.23608	0.0723318	7		51.2	-0.0182996	0.0288218	31
130.5	0.247689	0.0788858	7		51.4	-0.0200192	0.0302325	31
131	0.249456	0.0779068	7		51.6	-0.0162517	0.0297783	31
131.5	0.244197	0.0760904	7		51.8	-0.0177272	0.0276947	31
132	0.238101	0.0727061	7		52	-0.019798	0.0289424	31
132.5	0.248129	0.0793586	7		52.2	-0.0198034	0.0294495	31
133	0.224718	0.0819404	7		52.4	-0.0205006	0.0296123	31
133.5	0.23439	0.0811764	7		52.6	-0.0176312	0.0280555	31
134	0.209534	0.0768441	7		52.8	-0.0185763	0.0325354	31
134.5	0.226293	0.0798478	7		53	-0.0178768	0.034457	31
135	0.238062	0.0791502	7		53.2	-0.0190431	0.0320881	31
135.5	0.227673	0.0851662	7		53.4	-0.0164166	0.0308108	31
136	0.224937	0.0775283	7		53.6	-0.0196031	0.0324612	31
136.5	0.219186	0.0801108	7		53.8	-0.0162568	0.0351631	31
137	0.224832	0.0772699	7		54	-0.0169806	0.0313061	31
137.5	0.224195	0.0707424	7		54.2	-0.0163084	0.035656	31
138	0.232349	0.069762	7		54.4	-0.0163363	0.0291791	31
138.5	0.237475	0.0673806	7		54.6	-0.0192295	0.0334575	31
139	0.226051	0.0714364	7		54.8	-0.0224461	0.0343883	31
139.5	0.24541	0.0705626	7		55	-0.0199202	0.0317353	31
140	0.236073	0.0711851	7		55.2	-0.019313	0.0368363	31
140.5	0.243984	0.0630052	7		55.4	-0.0161696	0.0333831	31
141	0.242221	0.0653875	7		55.6	-0.0179619	0.0317056	31
141.5	0.22866	0.0707716	7		55.8	-0.0144669	0.0327409	31
142	0.237268	0.0708667	7		56	-0.0194037	0.0316316	31
142.5	0.241951	0.0591605	7		56.2	-0.0210415	0.0334931	31
143	0.248212	0.0688629	7		56.4	-0.0185898	0.0349883	31
143.5	0.232906	0.068221	7		56.6	-0.0213285	0.0310125	31
144	0.229308	0.0683448	7		56.8	-0.0186534	0.030753	31
144.5	0.235797	0.0658858	7		57	-0.0202494	0.0347192	31
145	0.238226	0.0712834	7		57.2	-0.0195994	0.0346325	31
145.5	0.22095	0.0655868	7		57.4	-0.015528	0.0327421	31
146	0.243767	0.0653396	7		57.6	-0.0160806	0.0324462	31
146.5	0.230283	0.0701787	7		57.8	-0.0215388	0.0352834	31
147	0.24198	0.0647001	7		58	-0.0178132	0.032613	31
147.5	0.226046	0.0650123	7		58.2	-0.0164348	0.0359381	31
148	0.235461	0.0656299	7		58.4	-0.0217637	0.0361231	31
148.5	0.233398	0.0685011	7		58.6	-0.0174979	0.0340815	31
149	0.22708	0.0658277	7		58.8	-0.0169576	0.0337629	31
149.5	0.234584	0.0667078	7		59	-0.0216205	0.0374448	31
150	0.241282	0.0662416	7		59.2	-0.0174956	0.0339199	31
150.5	0.235444	0.0644632	7		59.4	-0.0156428	0.0339391	31
151	0.23786	0.0660499	7		59.6	-0.0172465	0.0331054	31
151.5	0.240508	0.0638833	7		59.8	-0.016365	0.0338879	31
152	0.222935	0.0654041	7		60	-0.0152402	0.034884	31
152.5	0.223238	0.0708722	7		60.2	-0.0162595	0.034933	31
153	0.228364	0.0621465	7		60.4	-0.0199549	0.0357947	31
153.5	0.238839	0.0646606	7		60.6	-0.0154527	0.0346925	31
154	0.237334	0.0643774	7		60.8	-0.019267	0.0358045	31
154.5	0.226097	0.0648615	7		61	-0.0153748	0.0343204	31
155	0.226071	0.0652514	7		61.2	-0.0210247	0.0333319	31
155.5	0.225995	0.0697509	7		61.4	-0.0164296	0.0325316	31
156	0.2234	0.0646147	7		61.6	-0.0188757	0.0360168	31
156.5	0.225166	0.063341	7		61.8	-0.017529	0.0351809	31
157	0.236608	0.0678304	7		62	-0.0202307	0.0332829	31
157.5	0.238571	0.0628104	7		62.2	-0.0150085	0.0377975	31
158	0.245105	0.0677651	7		62.4	-0.0192845	0.0357475	31
158.5	0.233892	0.0617099	7		62.6	-0.0163108	0.0340546	31
159	0.222016	0.0639924	7		62.8	-0.0180837	0.0336508	31
159.5	0.229792	0.0653457	7		63	-0.018107	0.0339338	31
160	0.224548	0.066269	7		63.2	-0.0194115	0.033558	31
160.5	0.230344	0.0644281	7		63.4	-0.0177871	0.0334813	31
161	0.228729	0.0631301	7		63.6	-0.0179201	0.0360261	31
161.5	0.212097	0.0629287	7		63.8	-0.0167949	0.0360213	31
162	0.223116	0.0658264	7		64	-0.0205081	0.0351735	31
162.5	0.220783	0.0644412	7		64.2	-0.0172661	0.0360956	31
163	0.205772	0.0725158	7		64.4	-0.0177737	0.0357304	31
163.5	0.222913	0.063641	7		64.6	-0.0178919	0.0347476	31
164	0.202921	0.0682888	7		64.8	-0.0180738	0.0375837	31
164.5	0.208433	0.0669283	7		65	-0.0149589	0.0363751	31
165	0.224042	0.0675804	7		65.2	-0.0191738	0.0392351	31
165.5	0.223203	0.0696668	7		65.4	-0.0149035	0.0360031	31
166	0.206005	0.0662723	7		65.6	-0.0173498	0.038079	31
166.5	0.211339	0.067865	7		65.8	-0.0180636	0.0383353	31
167	0.222459	0.0655427	7		66	-0.0173575	0.0373777	31
167.5	0.230811	0.0624248	7		66.2	-0.0166949	0.0397004	31
168	0.213691	0.0659688	7		66.4	-0.0161809	0.035345	31
168.5	0.212311	0.0650775	7		66.6	-0.0198858	0.0372127	31
169	0.211358	0.0658433	7		66.8	-0.0160488	0.0362264	31
169.5	0.222572	0.0671717	7		67	-0.0153405	0.0383608	31
170	0.210034	0.0633128	7		67.2	-0.0194945	0.0396931	31
170.5	0.215726	0.067963	7		67.4	-0.0193403	0.0410989	31
171	0.220636	0.0640271	7		67.6	-0.0173428	0.039454	31
171.5	0.205995	0.0641889	7		67.8	-0.0168114	0.0380815	31
172	0.211834	0.0625872	7		68	-0.0158967	0.0396536	31
172.5	0.206708	0.0669549	7		68.2	-0.0154228	0.0398243	31
173	0.208892	0.0656535	7		68.4	-0.0152561	0.0391295	31
173.5	0.227718	0.0625868	7		68.6	-0.0163842	0.0396254	31
174	0.224095	0.059382	7		68.8	-0.0188086	0.0428454	31
174.5	0.21872	0.0623703	7		69	-0.0119672	0.0400701	31
175	0.227833	0.061737	7		69.2	-0.0146402	0.0385859	31
175.5	0.225624	0.0625295	7		69.4	-0.0136525	0.0406002	31
176	0.220639	0.0637802	7		69.6	-0.014569	0.0401024	31
176.5	0.223054	0.0634624	7		69.8	-0.0169185	0.0392213	31
177	0.208695	0.0605876	7		70	-0.0187448	0.0394219	31
177.5	0.213443	0.0626094	7		70.2	-0.0148649	0.0378493	31
178	0.216952	0.0582612	7		70.4	-0.015444	0.0374786	31
178.5	0.21648	0.0604769	7		70.6	-0.0176734	0.0382411	31
179	0.20857	0.0540273	7		70.8	-0.0123974	0.0389467	31
179.5	0.215801	0.0593085	7		71	-0.015656	0.0398624	31
180	0.211492	0.0631898	7		71.2	-0.0150655	0.0397166	31
180.5	0.212126	0.0556907	7		71.4	-0.0153119	0.0398797	31
181	0.199059	0.0657733	7		71.6	-0.0136771	0.0378804	31
181.5	0.197768	0.0649844	7		71.8	-0.0140352	0.040186	31
182	0.201374	0.0648472	7		72	-0.0153886	0.0402686	31
182.5	0.204638	0.0621898	7		72.2	-0.0136068	0.0413208	31
183	0.199027	0.058495	7		72.4	-0.0166699	0.0407595	31
183.5	0.199349	0.0579492	7		72.6	-0.0190273	0.0430943	31
184	0.205832	0.0621954	7		72.8	-0.0177809	0.041898	31
184.5	0.208075	0.0596631	7		73	-0.0164967	0.0429684	31
185	0.200068	0.0611606	7		73.2	-0.0160245	0.0442995	31
185.5	0.213636	0.058635	7		73.4	-0.0149249	0.041337	31
186	0.213088	0.0569773	7		73.6	-0.0132171	0.0402487	31
186.5	0.209249	0.0617816	7		73.8	-0.0135511	0.0397993	31
187	0.216084	0.0572606	7		74	-0.0180496	0.0422596	31
187.5	0.211047	0.0552107	7		74.2	-0.0137135	0.0389933	31
188	0.204032	0.0585016	7		74.4	-0.00963218	0.0432534	31
188.5	0.210851	0.0557047	7		74.6	-0.0146371	0.0403509	31
189	0.20032	0.0568596	7		74.8	-0.0154396	0.0383346	31
189.5	0.205185	0.0574431	7		75	-0.0145103	0.0393402	31
190	0.18609	0.0591123	7		75.2	-0.0146399	0.0409062	31
190.5	0.19838	0.0590498	7		75.4	-0.0176829	0.0434255	31
191	0.205981	0.0578937	7		75.6	-0.0130826	0.0398024	31
191.5	0.193269	0.0625261	7		75.8	-0.015963	0.0417996	31
192	0.203066	0.0576702	7		76	-0.0168412	0.0388272	31
192.5	0.198905	0.0602752	7		76.2	-0.0178022	0.0402098	31
193	0.197464	0.0536	7		76.4	-0.0144271	0.0419741	31
193.5	0.205212	0.0594082	7		76.6	-0.0119381	0.0419743	31
194	0.200597	0.059795	7		76.8	-0.0112301	0.0420805	31
194.5	0.207126	0.0642826	7		77	-0.0122218	0.0422303	31
195	0.193957	0.0569944	7		77.2	-0.0126043	0.0399638	31
195.5	0.210137	0.0550273	7		77.4	-0.0142895	0.0414672	31
196	0.198993	0.0561193	7		77.6	-0.013397	0.0434994	31
196.5	0.194076	0.0566185	7		77.8	-0.0136448	0.0436834	31
197	0.206456	0.0526031	7		78	-0.0122611	0.0431961	31
197.5	0.181714	0.0581348	7		78.2	-0.0125529	0.0432689	31
198	0.197353	0.0593094	7		78.4	-0.0128206	0.0416087	31
198.5	0.190182	0.062722	7		78.6	-0.0150052	0.043128	31
199	0.200191	0.0601876	7		78.8	-0.0132378	0.0412651	31
199.5	0.197716	0.0558834	7		79	-0.0153787	0.0420193	31
200	0.18789	0.0576258	7		79.2	-0.0161396	0.041734	31
200.5	0.195975	0.0544893	7		79.4	-0.0182015	0.0413366	31
201	0.190142	0.0589935	7		79.6	-0.0188187	0.0428647	31
201.5	0.184248	0.0540934	7		79.8	-0.0175642	0.0401411	31
202	0.186156	0.0607737	7		80	-0.0172594	0.0430047	31
202.5	0.186826	0.0497499	7		80.2	-0.0194787	0.0417019	31
203	0.188877	0.0618716	7		80.4	-0.0203605	0.0420777	31
203.5	0.183464	0.0587706	7		80.6	-0.0233424	0.0415559	31
204	0.1826	0.0547589	7		80.8	-0.0223552	0.04243	31
204.5	0.19668	0.0539282	7		81	-0.0241356	0.0424735	31
205	0.192022	0.0562727	7		81.2	-0.0202809	0.0426328	31
205.5	0.196915	0.0555838	7		81.4	-0.0232229	0.0446367	31
206	0.203297	0.0547603	7		81.6	-0.0236129	0.0453446	31
206.5	0.202692	0.0579652	7		81.8	-0.0232146	0.0427574	31
207	0.1969	0.0549292	7		82	-0.0270886	0.0416641	31
207.5	0.199399	0.060098	7		82.2	-0.0240269	0.0413805	31
208	0.186115	0.0592148	7		82.4	-0.025178	0.0428278	31
208.5	0.179857	0.0524446	7		82.6	-0.0235821	0.0444372	31
209	0.197565	0.0547707	7		82.8	-0.0241011	0.0425615	31
209.5	0.189373	0.0519614	7		83	-0.0236373	0.044777	31
210	0.180339	0.0551465	7		83.2	-0.025918	0.046308	31
210.5	0.193439	0.0578178	7		83.4	-0.0228348	0.0445622	31
211	0.182046	0.0551663	7		83.6	-0.0229787	0.0433987	31
211.5	0.195471	0.0543176	7		83.8	-0.0263409	0.043825	31
212	0.190415	0.0532458	7		84	-0.0217589	0.0397966	31
212.5	0.194526	0.0553847	7		84.2	-0.025579	0.0457148	31
213	0.194387	0.054018	7		84.4	-0.022816	0.0408387	31
213.5	0.187096	0.0548054	7		84.6	-0.0265189	0.0439017	31
214	0.194572	0.051539	7		84.8	-0.0248326	0.0434776	31
214.5	0.192218	0.0504931	7		85	-0.025041	0.0428307	31
215	0.207581	0.0512055	7		85.2	-0.0308001	0.0448231	31
215.5	0.19523	0.0524183	7		85.4	-0.0269813	0.0462874	31
216	0.193084	0.0493429	7		85.6	-0.0252328	0.0475545	31
216.5	0.195999	0.0485377	7		85.8	-0.0274649	0.0465352	31
217	0.196856	0.0496542	7		86	-0.0246206	0.0447826	31
217.5	0.206309	0.0457779	7		86.2	-0.028001	0.0497484	31
218	0.200673	0.0491383	7		86.4	-0.0280119	0.0493783	31
218.5	0.20183	0.0552414	7		86.6	-0.0286454	0.0472458	31
219	0.191868	0.0511974	7		86.8	-0.0263107	0.0466114	31
219.5	0.192599	0.054607	7		87	-0.0344822	0.05026	31
220	0.206219	0.0515873	7		87.2	-0.0309499	0.0495702	31
220.5	0.187652	0.0569958	7		87.4	-0.0342395	0.050065	31
221	0.194397	0.0599628	7		87.6	-0.030169	0.0520672	31
221.5	0.182474	0.0523677	7		87.8	-0.0307059	0.0519613	31
222	0.17083	0.0595741	7		88	-0.0352608	0.0491942	31
222.5	0.183754	0.0594379	7		88.2	-0.0327198	0.0492673	31
223	0.178097	0.0545435	7		88.4	-0.0358186	0.0473061	31
223.5	0.17101	0.0579656	7		88.6	-0.0340364	0.0496155	31
224	0.172397	0.0583937	7		88.8	-0.0325242	0.0454045	31
224.5	0.168965	0.0580065	7		89	-0.0361586	0.0462722	31
225	0.175455	0.05996	7		89.2	-0.0319173	0.0484261	31
225.5	0.177893	0.0614489	7		89.4	-0.0323424	0.0505397	31
226	0.179275	0.0639915	7		89.6	-0.0344634	0.0464784	31
226.5	0.18068	0.0631831	7		89.8	-0.0346634	0.0473565	31
227	0.170211	0.062693	7		90	-0.0334201	0.048751	31
227.5	0.165642	0.0626086	7		90.2	-0.0352458	0.0499895	31
228	0.169181	0.0631276	7		90.4	-0.0366754	0.0502052	31
228.5	0.155303	0.0627028	7		90.6	-0.0350251	0.0513648	31
229	0.172963	0.0629296	7		90.8	-0.0395105	0.0502522	31
229.5	0.173027	0.0602451	7		91	-0.0356179	0.0505379	31
230	0.165053	0.058506	7		91.2	-0.0380134	0.0512703	31
230.5	0.17068	0.0596457	7		91.4	-0.03671	0.053228	31
231	0.167408	0.0604613	7		91.6	-0.0390428	0.052183	31
231.5	0.169278	0.0599175	7		91.8	-0.0353864	0.0524143	31
232	0.159654	0.0595075	7		92	-0.036959	0.0513477	31
232.5	0.157648	0.0624502	7		92.2	-0.0377536	0.0508634	31
233	0.170181	0.0613753	7		92.4	-0.0368217	0.0543857	31
233.5	0.159838	0.0557984	7		92.6	-0.0385027	0.0543834	31
234	0.160804	0.0582829	7		92.8	-0.0343514	0.0520195	31
234.5	0.150778	0.0616632	7		93	-0.0335208	0.0480852	31
235	0.160365	0.0560232	7		93.2	-0.0333217	0.0491718	31
235.5	0.15956	0.0542215	7		93.4	-0.0319709	0.0500598	31
236	0.172185	0.0595493	7		93.6	-0.0308112	0.0505105	31
236.5	0.153824	0.0575832	7		93.8	-0.0281063	0.0478979	31
237	0.15744	0.061398	7		94	-0.0308687	0.050409	31
237.5	0.154827	0.0600196	7		94.2	-0.028129	0.04812	31
238	0.157422	0.0588388	7		94.4	-0.028951	0.0473639	31
238.5	0.14871	0.0646964	7		94.6	-0.0289534	0.0454104	31
239	0.15549	0.0589684	7		94.8	-0.0290855	0.0456888	31
239.5	0.159135	0.0612788	7		95	-0.0281064	0.0481972	31
240	0.159642	0.0612685	7		95.2	-0.0236479	0.0447445	31
240.5	0.154236	0.0620827	7		95.4	-0.0221545	0.0469585	31
241	0.150344	0.0582276	7		95.6	-0.0272607	0.04687	31
241.5	0.153642	0.0637363	7		95.8	-0.0251698	0.045241	31
242	0.145611	0.0625127	7		96	-0.0218535	0.0449465	31
242.5	0.163924	0.0620851	7		96.2	-0.023291	0.0446746	31
243	0.160796	0.0625471	7		96.4	-0.0218391	0.0458072	31
243.5	0.156713	0.0614887	7		96.6	-0.0258712	0.0448359	31
244	0.160693	0.0605924	7		96.8	-0.0227495	0.0471705	31
244.5	0.16583	0.0588028	7		97	-0.024072	0.0457012	31
245	0.155749	0.0639847	7		97.2	-0.0215838	0.046369	31
245.5	0.137126	0.0638378	7		97.4	-0.0226821	0.0445672	31
246	0.152435	0.059846	7		97.6	-0.020505	0.0445053	31
246.5	0.154769	0.061084	7		97.8	-0.0206916	0.0477335	31
247	0.15066	0.0630625	7		98	-0.0196019	0.0473163	31
247.5	0.143708	0.0586356	7		98.2	-0.0227655	0.0480281	31
248	0.14891	0.0599553	7		98.4	-0.0190544	0.0457904	31
248.5	0.150133	0.0629262	7		98.6	-0.0202598	0.0479834	31
249	0.139381	0.0592001	7		98.8	-0.0222383	0.0483342	31
249.5	0.146171	0.0582083	7		99	-0.0226698	0.0451194	31
250	0.143499	0.0582233	7		99.2	-0.0248629	0.0486883	31
250.5	0.155599	0.0518877	7		99.4	-0.0211079	0.0462203	31
251	0.13816	0.0534885	7		99.6	-0.0227965	0.0460241	31
251.5	0.151634	0.0623368	7		99.8	-0.0237287	0.0458893	31
252	0.147134	0.0616752	7		100	-0.0229006	0.0460842	31
252.5	0.132933	0.0600577	7		100.2	-0.0216375	0.0461605	31
253	0.138234	0.0619349	7		100.4	-0.0230669	0.0440764	31
253.5	0.136185	0.0627877	7		100.6	-0.022079	0.0458494	31
254	0.129308	0.0626772	7		100.8	-0.0233723	0.0468584	31
254.5	0.132433	0.0619812	7		101	-0.022426	0.0483918	31
255	0.127744	0.0607128	7		101.2	-0.02596	0.0431044	31
255.5	0.134268	0.0629264	7		101.4	-0.0201266	0.0437847	31
256	0.127209	0.0643217	7		101.6	-0.0246923	0.046192	31
256.5	0.133277	0.0620165	7		101.8	-0.0233224	0.0446322	31
257	0.135451	0.0611765	7		102	-0.021909	0.0446926	31
257.5	0.130638	0.06279	7		102.2	-0.0228641	0.0459369	31
258	0.138501	0.0618268	7		102.4	-0.0238394	0.0451485	31
258.5	0.13979	0.063165	7		102.6	-0.023188	0.0465091	31
259	0.140259	0.0601081	7		102.8	-0.0230502	0.0456591	31
259.5	0.151505	0.0599112	7		103	-0.0221899	0.0475011	31
260	0.150537	0.0568259	7		103.2	-0.021822	0.0452123	31
260.5	0.148535	0.0593752	7		103.4	-0.0232603	0.0475704	31
261	0.151478	0.0587982	7		103.6	-0.0254813	0.0486355	31
261.5	0.140033	0.0621468	7		103.8	-0.0234825	0.0479529	31
262	0.137084	0.0620759	7		104	-0.024653	0.0455248	31
262.5	0.142411	0.0600251	7		104.2	-0.0239211	0.0450793	31
263	0.135755	0.0611571	7		104.4	-0.0220316	0.0446744	31
263.5	0.13646	0.0599518	7		104.6	-0.0237266	0.0470005	31
264	0.143912	0.0561562	7		104.8	-0.0247981	0.046102	31
264.5	0.13962	0.0633498	7		105	-0.0284835	0.0472217	31
265	0.141071	0.0615978	7		105.2	-0.0252268	0.0437756	31
265.5	0.137647	0.0592943	7		105.4	-0.0267623	0.046796	31
266	0.148849	0.0603716	7		105.6	-0.0259366	0.0474444	31
266.5	0.148773	0.057755	7		105.8	-0.0262357	0.0457905	31
267	0.132015	0.0590183	7		106	-0.0276815	0.0460709	31
267.5	0.136746	0.0663766	7		106.2	-0.0261648	0.0476755	31
268	0.134395	0.0656958	7		106.4	-0.0257079	0.047822	31
268.5	0.125076	0.0683089	7		106.6	-0.0288764	0.0497118	31
269	0.132555	0.060453	7		106.8	-0.0285031	0.0493939	31
269.5	0.139216	0.0644073	7		107	-0.0272462	0.0478948	31
270	0.133591	0.0619678	7		107.2	-0.0231329	0.0483691	31
270.5	0.132839	0.0624073	7		107.4	-0.0273765	0.0485076	31
271	0.142723	0.0652406	7		107.6	-0.0258545	0.0473064	31
271.5	0.120339	0.0669759	7		107.8	-0.0287727	0.0452803	31
272	0.131259	0.0622931	7		108	-0.0263046	0.0455253	31
272.5	0.121073	0.0622952	7		108.2	-0.02658	0.0476226	31
273	0.127547	0.0587531	7		108.4	-0.0271138	0.0466218	31
273.5	0.117548	0.062193	7		108.6	-0.0258944	0.046398	31
274	0.123336	0.0576014	7		108.8	-0.0265905	0.0447042	31
274.5	0.120443	0.0604429	7		109	-0.0288338	0.046093	31
275	0.133747	0.0634585	7		109.2	-0.028589	0.0461653	31
275.5	0.130605	0.0634324	7		109.4	-0.0265843	0.047421	31
276	0.136107	0.0628311	7		109.6	-0.0287692	0.0457517	31
276.5	0.121891	0.0601673	7		109.8	-0.0283892	0.0449249	31
277	0.12205	0.0570091	7		110	-0.0285694	0.0463523	31
277.5	0.113431	0.0589919	7		110.2	-0.0283235	0.0463498	31
278	0.126026	0.0592249	7		110.4	-0.024343	0.0456254	31
278.5	0.131464	0.0595985	7		110.6	-0.031038	0.0464984	31
279	0.127775	0.0606292	7		110.8	-0.0272314	0.0439281	31
279.5	0.122944	0.0599292	7		111	-0.0269863	0.0449827	31
280	0.123564	0.0571278	7		111.2	-0.0311125	0.0439194	31
280.5	0.125421	0.0595818	7		111.4	-0.0259124	0.0441632	31
281	0.131927	0.058907	7		111.6	-0.0248423	0.0459675	31
281.5	0.131007	0.0593958	7		111.8	-0.0302601	0.0457472	31
282	0.131822	0.0611868	7		112	-0.0305798	0.043521	31
282.5	0.130444	0.0594295	7		112.2	-0.029009	0.0449203	31
283	0.13152	0.0604349	7		112.4	-0.0309962	0.0458624	31
283.5	0.129406	0.0611043	7		112.6	-0.0267141	0.0459142	31
284	0.116753	0.0539442	7		112.8	-0.0274906	0.0465034	31
284.5	0.12492	0.053297	7		113	-0.0272241	0.0459938	31
285	0.127157	0.0542075	7		113.2	-0.0308505	0.0450047	31
285.5	0.130926	0.0544081	7		113.4	-0.0291578	0.0465312	31
286	0.129652	0.0565354	7		113.6	-0.0273511	0.0492546	31
286.5	0.146343	0.0536565	7		113.8	-0.0300234	0.0485735	31
287	0.135389	0.0553286	7		114	-0.0249487	0.0474918	31
287.5	0.11198	0.0522456	7		114.2	-0.030903	0.0480652	31
288	0.127872	0.0551003	7		114.4	-0.0308546	0.0477011	31
288.5	0.125107	0.0513445	7		114.6	-0.028323	0.0461674	31
289	0.136694	0.0559941	7		114.8	-0.0305759	0.0509569	31
289.5	0.138621	0.0575355	7		115	-0.0294018	0.045931	31
290	0.127639	0.0546475	7
290.5	0.136905	0.055199	7
291	0.134858	0.0571931	7
291.5	0.136292	0.0555218	7
292	0.127075	0.0546449	7
292.5	0.129036	0.053324	7
293	0.134115	0.0552775	7
293.5	0.135696	0.056137	7
294	0.132995	0.0515948	7
294.5	0.127645	0.0545902	7
295	0.12869	0.0554964	7
295.5	0.124024	0.0564528	7
296	0.129451	0.0553129	7
296.5	0.114608	0.0557401	7
297	0.129081	0.056205	7
297.5	0.119959	0.0574956	7
298	0.121583	0.0554577	7
298.5	0.118255	0.0611369	7
299	0.130232	0.0529616	7
299.5	0.112497	0.056313	7
300	0.12519	0.0555688	7

## Sheet: Figure 1-figure sup 1D
Figure 1-figure supplement 1D
Time (sec)
-2.9	1742.94
-2.8	1751.38
-2.7	1718.87
-2.6	1743.93
-2.5	1707.38
-2.4	1749.38
-2.3	1735.57
-2.2	1698.72
-2.1	1675.53
-2	1703.11
-1.9	1657.71
-1.8	1683.69
-1.7	1695.93
-1.6	1682.53
-1.5	1658.52
-1.4	1684.46
-1.3	1673.85
-1.2	1664.52
-1.1	1696.82
-1	1679.36
-0.9	1644.09
-0.8	1644.78
-0.7	1653.18
-0.6	1589.88
-0.5	1653.31
-0.4	1607.13
-0.3	1651.93
-0.2	1614.62
-0.1	1637.98
0	1623.57
0.1	1802.48
0.2	1815.64
0.3	1802.65
0.4	1830.88
0.5	1888.55
0.6	1914.73
0.7	2002.16
0.8	2059.84
0.9	2100.76
1	2192.48
1.1	2247.58
1.2	2321.38
1.3	2301.67
1.4	2398.16
1.5	2438.71
1.6	2460.68
1.7	2446.91
1.8	2515.63
1.9	2514.56
2	2589.06
2.1	2505.16
2.2	2487.64
2.3	2476.55
2.4	2472.38
2.5	2521.15
2.6	2529.12
2.7	2513.57
2.8	2522.42
2.9	2532.2
3	2515.81
3.1	2508.49
3.2	2502.39
3.3	2529.71
3.4	2536.92
3.5	2506.37
3.6	2528.29
3.7	2579.38
3.8	2503.22
3.9	2552.68
4	2536.2
4.1	2548.68
4.2	2505.99
4.3	2511.88
4.4	2531.43
4.5	2503.95
4.6	2509.45
4.7	2480.22
4.8	2505.75
4.9	2490.43
5	2519.54
5.1	2479.33
5.2	2493.38
5.3	2516.31
5.4	2522.95
5.5	2479.27
5.6	2451.37
5.7	2448.74
5.8	2468.98
5.9	2464.35
6	2481.83
6.1	2455.97
6.2	2494.07
6.3	2513.54
6.4	2508.07
6.5	2489.27
6.6	2501.05
6.7	2486.04
6.8	2465.45
6.9	2511.16
7	2516.49
7.1	2504.69
7.2	2518.97
7.3	2522
7.4	2481.02
7.5	2513.47
7.6	2455.84
7.7	2488.36
7.8	2486.69
7.9	2512.52
8	2452.94
8.1	2522.96
8.2	2543.17
8.3	2489.58
8.4	2456.77
8.5	2514.03
8.6	2499.79
8.7	2504.91
8.8	2448.44
8.9	2489.06
9	2508.68
9.1	2486
9.2	2476.43
9.3	2480.87
9.4	2565.04
9.5	2464.18
9.6	2467.22
9.7	2456.28
9.8	2478.4
9.9	2505.44
10	2514.61
10.1	2497.34
10.2	2485.99
10.3	2484.45
10.4	2505.6
10.5	2488.41
10.6	2483.83
10.7	2513.44
10.8	2485.56
10.9	2516
11	2481.72
11.1	2465.43
11.2	2471.57
11.3	2496.91
11.4	2489.11
11.5	2442.08
11.6	2478.95
11.7	2466.68
11.8	2444.69
11.9	2474.91
12	2503.05
12.1	2899.49
12.2	2893.99
12.3	2811.6
12.4	2779.33
12.5	2717
12.6	2803.23
12.7	2757.3
12.8	2798.6
12.9	2779.38
13	2786.8
13.1	2800.02
13.2	2830.14
13.3	2812.68
13.4	2791.97
13.5	2801.93
13.6	2853.15
13.7	2832.95
13.8	2849
13.9	2868.62
14	2947.88
14.1	2773.2
14.2	2737.91
14.3	2773.25
14.4	2732.38
14.5	2768.13
14.6	2748.38
14.7	2779.37
14.8	2740.36
14.9	2778.43
15	2781.36
15.1	2797.13
15.2	2762.15
15.3	2759.96
15.4	2756.74
15.5	2727.08
15.6	2708.86
15.7	2740.91
15.8	2763.52
15.9	2752.68
16	2703.53
16.1	2751.57
16.2	2761.17
16.3	2726.65
16.4	2729.2
16.5	2702.8
16.6	2754.67
16.7	2721.64
16.8	2769.64
16.9	2695.64
17	2726.94
17.1	2678.89
17.2	2710.1
17.3	2680.89
17.4	2697.51
17.5	2688.81
17.6	2692.57
17.7	2732.61
17.8	2718.27
17.9	2689.5
18	2679.43
18.1	2734.49
18.2	2686.48
18.3	2701.82
18.4	2676.91
18.5	2713.38
18.6	2641.15
18.7	2655.31
18.8	2662.67
18.9	2705.09
19	2673.28
19.1	2700.12
19.2	2689.81
19.3	2715.08
19.4	2651.43
19.5	2619.17
19.6	2669.4
19.7	2702.42
19.8	2646.7
19.9	2688.28
20	2677.45
20.1	2659.07
20.2	2649.06
20.3	2670.51
20.4	2658.76
20.5	2660.03
20.6	2694.15
20.7	2629.03
20.8	2661.08
20.9	2613.4
21	2648.79
21.1	2648.2
21.2	2625.88
21.3	2630.81
21.4	2652.36
21.5	2662.03
21.6	2639.63
21.7	2652.12
21.8	2644.55
21.9	2607.28
22	2634.38
22.1	2656.33
22.2	2607.2
22.3	2661.83
22.4	2615.12
22.5	2631.61
22.6	2624.26
22.7	2615.09
22.8	2600.45
22.9	2613.68
23	2651.16
23.1	2661.26
23.2	2564.38
23.3	2599.66
23.4	2602.69
23.5	2620.64
23.6	2598.02
23.7	2594.55
23.8	2647.55
23.9	2610.53
24	2613.51
24.1	3009.17
24.2	2989.26
24.3	2937.76
24.4	2882.07
24.5	2864.58
24.6	2851.67
24.7	2804.63
24.8	2858.73
24.9	2834.83
25	2889.13
25.1	2821.43
25.2	2883.03
25.3	2931.84
25.4	2909.69
25.5	2917.67
25.6	2901.56
25.7	2955.35
25.8	2927.36
25.9	2983.69
26	2933.3
26.1	2932.51
26.2	2872.41
26.3	2876.24
26.4	2873.86
26.5	2890.81
26.6	2867.64
26.7	2880.05
26.8	2825.87
26.9	2862.87
27	2845.18
27.1	2878.83
27.2	2864.95
27.3	2919.08
27.4	2886.5
27.5	2861.5
27.6	2908.41
27.7	2896.34
27.8	2873.37
27.9	2821.27
28	2867.62
28.1	2851.09
28.2	2875.8
28.3	2826.2
28.4	2870.97
28.5	2825.23
28.6	2925.18
28.7	2847.99
28.8	2871.23
28.9	2855.67
29	2825.53
29.1	2846.44
29.2	2856.42
29.3	2858.62
29.4	2772.05
29.5	2853.36
29.6	2836.86
29.7	2839.22
29.8	2794.89
29.9	2791.92
30	2846.98
30.1	2779.48
30.2	2806.93
30.3	2808.68
30.4	2814.99
30.5	2810.53
30.6	2845.63
30.7	2828.96
30.8	2812.44
30.9	2690.29
31	2835.71
31.1	2980.18
31.2	2791.31
31.3	2784.1
31.4	2806.48
31.5	2807.32
31.6	2839.18
31.7	2790.62
31.8	2801.15
31.9	2742.33
32	2811.56
32.1	2782.69
32.2	2786.23
32.3	2730.39
32.4	2807.73
32.5	2765.21
32.6	2760.37
32.7	2693.89
32.8	2779.85
32.9	2769.16
33	2805.4
33.1	2748.78
33.2	2769.1
33.3	2754.22
33.4	2733.81
33.5	2750.49
33.6	2714.59
33.7	2781.49
33.8	2749.45
33.9	2728.18
34	2684.26
34.1	2793.68
34.2	2726.49
34.3	2708.59
34.4	2666.37
34.5	2729.42
34.6	2710.97
34.7	2735.7
34.8	2699.11
34.9	2691.94
35	2748.15
35.1	2697.36
35.2	2736.97
35.3	2754.83
35.4	2793.48
35.5	2722.11
35.6	2738.14
35.7	2735.44
35.8	2722.33
35.9	2751.5
36	2743.54
36.1
36.2
36.3
36.4
36.5
36.6
36.7
36.8
36.9
37

## Sheet: Figure 1-figure sup 1E
Figure 1-figure supplement 1E
	Baseline-corrected of mitoGCaMP3 naive all					Baseline-corrected of mitoGCaMP3 d5 TRO19622 treated
Time (sec)	Mean	SEM	n		Time (sec)	Mean	SEM	n
-2.9	0.00429322	0.00409332	15		-2.9	0.00817233	0.00474785	15
-2.8	0.00207892	0.00403302	15		-2.8	0.00461514	0.00479579	15
-2.7	0.000174474	0.00441542	15		-2.7	0.00343979	0.00321063	15
-2.6	0.00404187	0.00294089	15		-2.6	0.00969684	0.0039331	15
-2.5	-0.000797884	0.00456235	15		-2.5	0.00439193	0.0035863	15
-2.4	-0.00422478	0.00498801	15		-2.4	0.00104003	0.00339681	15
-2.3	-0.0078758	0.00453847	15		-2.3	0.00472909	0.00269702	15
-2.2	-0.00333192	0.0035907	15		-2.2	0.00163279	0.00277222	15
-2.1	-0.00476976	0.00387609	15		-2.1	0.000109501	0.00254738	15
-2	-0.00615696	0.00254518	15		-2	0.000127706	0.00222048	15
-1.9	-0.00832938	0.00384215	15		-1.9	0.0036056	0.00396853	15
-1.8	-0.00936176	0.00280987	15		-1.8	0.000438471	0.0026612	15
-1.7	-0.00630023	0.00341507	15		-1.7	0.00166695	0.0028498	15
-1.6	-0.00585863	0.00231036	15		-1.6	0.00132856	0.00239043	15
-1.5	-0.00469629	0.00264396	15		-1.5	0.00402451	0.00238976	15
-1.4	-0.00558247	0.00214052	15		-1.4	0.00130751	0.00265475	15
-1.3	-0.00184051	0.00278512	15		-1.3	0.000551734	0.00235765	15
-1.2	-0.00363327	0.00256842	15		-1.2	-0.00412743	0.00252772	15
-1.1	-0.00197979	0.00249728	15		-1.1	-0.00347528	0.00280663	15
-1	-0.000576671	0.00226255	15		-1	-0.00440392	0.00315017	15
-0.9	-0.000962897	0.00293979	15		-0.9	-0.000952093	0.00227029	15
-0.8	0.00218272	0.00291519	15		-0.8	-0.00636861	0.00286675	15
-0.7	0.00135876	0.00277373	15		-0.7	-0.00692974	0.0023824	15
-0.6	0.00423779	0.00302663	15		-0.6	-0.00580366	0.00175915	15
-0.5	0.00893263	0.00427072	15		-0.5	-0.0018965	0.0027538	15
-0.4	0.00415285	0.00491799	15		-0.4	-0.00541357	0.00305379	15
-0.3	0.00775828	0.00634917	15		-0.3	-0.0027518	0.00336016	15
-0.2	0.0086744	0.00639274	15		-0.2	-0.00531997	0.00296459	15
-0.1	0.0114682	0.00590647	15		-0.1	0.00029274	0.00324303	15
0	0.0169249	0.0093582	15		0	-0.00372863	0.00541293	15
0.0999999	0.0347715	0.0118852	15		0.0999999	0.00702506	0.00557613	15
0.2	0.0535592	0.0182358	15		0.2	0.0194159	0.00666199	15
0.3	0.0627823	0.0186775	15		0.3	0.0201547	0.00740712	15
0.4	0.0714891	0.0212508	15		0.4	0.0250495	0.00729319	15
0.5	0.0898083	0.0233666	15		0.5	0.0326459	0.0101326	15
0.6	0.0911424	0.024121	15		0.6	0.030472	0.0108193	15
0.7	0.108028	0.0252261	15		0.7	0.0376757	0.0110938	15
0.8	0.116809	0.0271962	15		0.8	0.0395432	0.0122629	15
0.9	0.128741	0.0255381	15		0.9	0.0432969	0.0151377	15
1	0.13638	0.028359	15		1	0.0451748	0.0170163	15
1.1	0.1453	0.0282598	15		1.1	0.0542945	0.019757	15
1.2	0.158352	0.0313828	15		1.2	0.0585505	0.023597	15
1.3	0.168507	0.029782	15		1.3	0.0611338	0.0269364	15
1.4	0.181375	0.0309864	15		1.4	0.0722249	0.0285341	15
1.5	0.187216	0.0321902	15		1.5	0.0805352	0.0332198	15
1.6	0.199731	0.0323133	15		1.6	0.0797636	0.0357682	15
1.7	0.210177	0.0337031	15		1.7	0.0868676	0.0383454	15
1.8	0.225524	0.0360794	15		1.8	0.0939236	0.0399943	15
1.9	0.233377	0.0356628	15		1.9	0.100508	0.0426346	15
2	0.216708	0.0345775	15		2	0.0804637	0.0464063	15
2.1	0.221828	0.033946	15		2.1	0.0757712	0.04761	15
2.2	0.222396	0.0348079	15		2.2	0.0771554	0.0500226	15
2.3	0.234542	0.0365021	15		2.3	0.0760998	0.0512373	15
2.4	0.237003	0.0380414	15		2.4	0.0679051	0.0516416	15
2.5	0.236135	0.0383289	15		2.5	0.075854	0.0542408	15
2.6	0.241189	0.0391583	15		2.6	0.0697816	0.0555463	15
2.7	0.25295	0.0399582	15		2.7	0.0660729	0.0566495	15
2.8	0.249861	0.0400114	15		2.8	0.070491	0.0570663	15
2.9	0.25717	0.0404198	15		2.9	0.0632242	0.0591816	15
3	0.254839	0.0419731	15		3	0.0607516	0.0608776	15
3.1	0.259209	0.0401854	15		3.1	0.0538295	0.06119	15
3.2	0.260291	0.0414054	15		3.2	0.052472	0.060561	15
3.3	0.25935	0.0393711	15		3.3	0.053984	0.0620331	15
3.4	0.26504	0.0407511	15		3.4	0.0439152	0.062401	15
3.5	0.261722	0.0403467	15		3.5	0.0425923	0.0641599	15
3.6	0.25782	0.0401464	15		3.6	0.0368264	0.0641908	15
3.7	0.256204	0.0404685	15		3.7	0.0355124	0.0652212	15
3.8	0.258746	0.0410691	15		3.8	0.0291517	0.066733	15
3.9	0.260563	0.040086	15		3.9	0.026643	0.0669336	15
4	0.25749	0.0402535	15		4	0.0191334	0.0667016	15
4.1	0.254355	0.0399428	15		4.1	0.0230349	0.0684363	15
4.2	0.256585	0.0402815	15		4.2	0.0204802	0.0672761	15
4.3	0.253849	0.0391915	15		4.3	0.0137397	0.0688718	15
4.4	0.249939	0.0391998	15		4.4	0.0154235	0.0690481	15
4.5	0.251694	0.0394467	15		4.5	0.00816636	0.0706643	15
4.6	0.252144	0.0384153	15		4.6	0.0117488	0.0694743	15
4.7	0.24718	0.0388707	15		4.7	0.00885679	0.0711428	15
4.8	0.247429	0.0394772	15		4.8	0.00854668	0.0694892	15
4.9	0.243601	0.0391315	15		4.9	0.0102449	0.0709069	15
5	0.241793	0.0390334	15		5	0.00346274	0.069673	15

## Sheet: Figure 1-figure sup 1F
Figure 1-figure supplement 1F
IC50
[Ru360] (μM)	Mean	SEM	n		[Inhibitor] vs. response -- Variable slope (four parameters)
0	0.2336	0.05361	10		Best-fit values
0.5	0.366563	0.101694	13		Bottom	0.02193
2	0.107633	0.036931	9		Top	0.3911
5	0.0635544	0.0146697	13		IC50	1.366
10	0.036547	0.00484456	10		HillSlope	-1.399
					logIC50	0.1356
					Span	0.3692
					95% CI (profile likelihood)
					Bottom	??? to 0.1618
					Top	0.1799 to ???
					IC50	??? to 46.69
					HillSlope	???
					logIC50	??? to 1.669
					Goodness of Fit
					Degrees of Freedom	51
					R squared	0.2062
					Sum of Squares	2.309
					Sy.x	0.2128
					Constraints
					IC50	IC50 > 0
					Number of points
					# of X values	55
					# Y values analyzed	55
