# Supplementary material for: Synaptic mitochondria regulate hair-cell synapse size and function
Source: eLife journal article supplement (doi:10.7554/elife.48914), 2019-10-14
Supplement: supp [file elife-48914-supp-v1.zip › elife_poa_e48914_Figure_1_figure_supplement_2_source_data_1.xlsx]

## Sheet: Figure 1 S2Aii
Time (sec)	cell 1	cell 2	cell 3
-3.9	3658.15	6427.49	3067.16
-3.8	3641.2	6450.16	3035.55
-3.7	3633.8	6422.42	3037.43
-3.6	3590.49	6393.8	3008.33
-3.5	3613.66	6357.04	3024.59
-3.4	3585.3	6320.07	2991.55
-3.3	3614.1	6260.07	3011.99
-3.2	3609.2	6222.56	3030.94
-3.1	3609.05	6257.96	3001.95
-3	3613.73	6254.74	3001.17
-2.9	3594.71	6242.28	2986.42
-2.8	3608.03	6242.1	3000.08
-2.7	3614.74	6252.96	3024.3
-2.6	3583.32	6242.64	2978.54
-2.5	3561.25	6212.81	2961.47
-2.4	3578.56	6189.95	2994.53
-2.3	3615.13	6212.63	3017.89
-2.2	3608.68	6243.12	2991.59
-2.1	3638.72	6186.14	2995.61
-2	3631.09	6207.98	3015.35
-1.9	3635.08	6209	3001.7
-1.8	3632.56	6211.12	2994.62
-1.7	3593.94	6218.8	2995.62
-1.6	3598.24	6234.78	3018.45
-1.5	3603.61	6190.44	3034.86
-1.4	3593.62	6179.83	3027.72
-1.3	3601.55	6198.54	2980.35
-1.2	3568.84	6172.38	2979.01
-1.1	3584.85	6220.78	3022.08
-1	3613.27	6231.76	3001.5
-0.9	3588.94	6217.63	2987.55
-0.8	3588.08	6224.54	2953.79
-0.7	3589.97	6180.91	2981.45
-0.6	3600.34	6174.09	2976.88
-0.5	3558.02	6193.57	2938.29
-0.4	3554.71	6190.98	2938.18
-0.3	3607.29	6206.96	2944.6
-0.2	3590.16	6186.37	2987.2
-0.1	3606.04	6177.25	2981.77
0	3573.36	6156.56	2972.64
0.1	3600.02	6191.51	2931.45
0.2	3641.59	6212.81	3012.85
0.3	3634.97	6244.69	3016.7
0.4	3658.12	6303.19	2994.86
0.5	3656.56	6309.48	3010.01
0.6	3633.99	6378.36	3044.78
0.7	3681.44	6423.62	3047.19
0.8	3719.05	6457.49	3032.3
0.9	3752.66	6502.04	3041.08
1	3759.95	6594.98	3043.19
1.1	3781.95	6619.43	3075.39
1.2	3861.41	6639.29	3076.55
1.3	3910.73	6687.25	3107.12
1.4	3988.14	6729.07	3104.06
1.5	4069.83	6777.64	3139.12
1.6	4116.45	6815.82	3191.7
1.7	4229.65	6894.32	3190.1
1.8	4244.43	6917.47	3252.86
1.9	4345.88	6954.86	3314.72
2	4405.44	6962.9	3308
2.1	4448.54	6952.12	3348.36
2.2	4499.97	7034.11	3391.04
2.3	4526.17	7113.11	3376.97
2.4	4521.09	7108.21	3391.86
2.5	4571.35	7080.93	3423.08
2.6	4613.56	7046.08	3457.93
2.7	4599.61	7058.78	3482.8
2.8	4627.4	7015.62	3485.08
2.9	4662.33	7024.81	3491.09
3	4685.42	7073.92	3510.09
3.1	4664.04	7005.07	3512.52
3.2	4678.4	7054.29	3478.68
3.3	4699.01	7033.25	3505.69
3.4	4691.62	7012.43	3476.24
3.5	4662.4	7060.6	3524.06
3.6	4675.5	7037.14	3505.42
3.7	4699.94	7015.77	3526.04
3.8	4694.14	6990.75	3521.38
3.9	4711.23	6969.71	3513.09
4	4693.04	7027.75	3483.33
4.1	4690.31	6978.27	3529.22
4.2	4657.74	7014.77	3496.53
4.3	4689.71	6963.75	3479.26
4.4	4699.64	6955.67	3480.45
4.5	4685.51	6954.38	3475.88
4.6	4654.04	6934.8	3476.44
4.7	4708.02	6942.08	3487.59
4.8	4636.57	6959.66	3464.19
4.9	4665.81	6915.69	3474.03
5	4661.72	6949.26	3491.99
