# Supplementary material for: Synaptic mitochondria regulate hair-cell synapse size and function
Source: eLife journal article supplement (doi:10.7554/elife.48914), 2019-10-14
Supplement: supp [file elife-48914-supp-v1.zip › elife_poa_e48914_Figure_1_source_data_1.xlsx]

## Sheet: Figure 1D
Figure 1D Transmission Electron Micrographs
	Mito to ribbon edge (nm)			Mito to ribbon edge
Ribbon1	87		Number of values <1uM	17
Ribbon2	232
Ribbon3	304		25% Percentile	130
Ribbon4	*		Median	174
Ribbon5	174		75% Percentile	449.5
Ribbon6	*
Ribbon7	159
Ribbon8	435
Ribbon9	580
Ribbon10	116
Ribbon11	130
Ribbon12	667
Ribbon13	174
Ribbon14	*
Ribbon15	130
Ribbon16	130
Ribbon17	217
Ribbon18	464
Ribbon19	464
Ribbon20	*
Ribbon21	43
total # ribbons	21
* exclude >1um

## Sheet: Figure 1E ii
Figure 1E'' intensity measurements within ROI
	Used to create heatmap overlays				Used to create plots
	F				dF/F
Time (s)	ROI1	ROI2	ROI3	Time (s)	ROI1	ROI2	ROI3
-3	7898.2	4959.57	4964.26	-3	-0.0152142	0.00200942	0.00395701
-2.8	7992	4934.45	4993.12	-2.8	-0.00351871	-0.00306672	0.00979397
-2.6	7900.4	4899.82	4918.14	-2.6	-0.0149398	-0.0100622	-0.00537117
-2.4	8023.15	4892.41	4955.01	-2.4	0.000365219	-0.0115597	0.00208632
-2.2	7962.25	4917.25	4845.02	-2.2	-0.00722809	-0.00654173	-0.0201573
-2	7992.91	5026.89	4979.2	-2	-0.00340488	0.015609	0.00697782
-1.8	8014.23	5026.27	4944.44	-1.8	-0.000747594	0.0154852	-5.23389e-05
-1.6	8017.79	5043.11	4933.61	-1.6	-0.000303342	0.0188868	-0.00224176
-1.4	8074.7	4962.68	4986.02	-1.4	0.00679272	0.00263573	0.00835809
-1.2	8139.05	4846.06	4932.76	-1.2	0.0148162	-0.0209242	-0.00241345
-1	8015.7	4962.18	4989.56	-1	-0.000563684	0.00253471	0.0090734
-0.8	8095.48	4852.06	4950.39	-0.8	0.00938305	-0.019712	0.00115097
-0.6	8073.3	4937.27	4928.76	-0.6	0.00661816	-0.00249597	-0.0032224
-0.4	7990.84	4966.19	4888.99	-0.4	-0.00366372	0.00334548	-0.0112666
-0.2	8113.32	5018.21	4961.15	-0.2	0.0116087	0.0138562	0.00332744
0	8045	4932.5	4890.38	0	0.00308958	-0.00346069	-0.0109859
0.2	8108.09	4955.94	4915.66	0.2	0.0109556	0.00127461	-0.0058717
0.4	8114.9	4924.9	4860.77	0.4	0.0118051	-0.00499616	-0.0169721
0.6	8375.62	4949.01	4886.65	0.6	0.0443135	-0.000124481	-0.0117392
0.8	8374.98	5025.19	4890.29	0.8	0.0442325	0.0152656	-0.0110035
1	8681.95	5097	4881.07	1	0.0825076	0.0297741	-0.0128667
1.2	8917.23	5001.44	4809.44	1.2	0.111843	0.0104672	-0.0273543
1.4	9071.84	5132.64	4853.51	1.4	0.131121	0.0369743	-0.0184407
1.6	9150.69	5137.75	4841.1	1.6	0.140952	0.0380071	-0.0209511
1.8	9207.67	5115.84	4858.16	1.8	0.148058	0.0335799	-0.0175003
2	9474.71	5196.69	4945	2	0.181353	0.0499146	6.13182e-05
2.2	9422.36	5278.89	4911.05	2.2	0.174826	0.0665219	-0.00680462
2.4	9565.06	5252.4	4945.69	2.4	0.192618	0.0611704	0.000200457
2.6	9455.89	5314.23	4917.16	2.6	0.179006	0.0736612	-0.00556835
2.8	9569.58	5486.8	5100.34	2.8	0.193181	0.108527	0.0314762
3	9582.19	5389.35	5118.16	3	0.194754	0.0888392	0.0350813
3.2	9757.51	5510.54	5142.99	3.2	0.216614	0.113323	0.0401016
3.4	9588.64	5412.57	5039.34	3.4	0.195558	0.0935314	0.0191397
3.6	9686.21	5490.66	5164.94	3.6	0.207724	0.109308	0.0445409
3.8	9685.89	5431.48	5160.36	3.8	0.207683	0.0973499	0.0436155
4	9732.3	5405.25	5237.09	4	0.21347	0.0920515	0.0591321
4.2	9706.16	5414.39	5188.8	4.2	0.210211	0.0938977	0.0493667
4.4	9647.09	5475.74	5130.12	4.4	0.202846	0.106292	0.0375004
4.6	9685.85	5424.51	5159.41	4.6	0.207679	0.0959433	0.0434235
4.8	9681.8	5510.18	5137.06	4.8	0.207174	0.11325	0.0389033

## Sheet: Figure 1F
Figure 1F
	Untreated				10 uM Isradipine				2uM Ru360					10uM Ru360
	average dF/F	SEM	n		average dF/F	SEM	n		average dF/F	SEM	n			average dF/F	SEM	n								dF/F
Time (s)
-2.9	0.0100146	0.00264225	22		0.00652338	0.00418101	9		0.00595571	0.00262728	9			0.0198567	0.00373635	13
-2.8	0.00531739	0.00270439	22		0.0111842	0.00539855	9		0.00642305	0.00187367	9			0.0162603	0.00339107	13
-2.7	0.00752491	0.00260076	22		0.0115306	0.00409129	9		0.00508555	0.00282209	9			0.0204395	0.00474234	13
-2.6	0.00395798	0.00243538	22		-0.00694469	0.00686959	9		0.00790169	0.002863	9			0.0102814	0.00263974	13
-2.5	0.00557957	0.00239432	22		-0.00283382	0.00234566	9		0.0106367	0.0033662	9			0.0113577	0.00366369	13
-2.4	0.00168662	0.00228157	22		0.00271232	0.00198319	9		0.0133148	0.00283068	9			0.0101045	0.00305662	13
-2.3	-0.000292582	0.00264809	22		0.000951327	0.00301131	9		0.00185137	0.00213936	9			0.00213735	0.00263566	13
-2.2	0.00439251	0.00210071	22		0.00233586	0.00280624	9		0.00545844	0.00204527	9			0.0168804	0.00364487	13
-2.1	0.0061307	0.00225308	22		0.0016254	0.00288633	9		-0.000116112	0.00225329	9			0.0025389	0.00217447	13
-2	0.00287887	0.00206075	22		0.00319087	0.00629726	9		0.0071376	0.0021163	9			-0.000673879	0.00335736	13
-1.9	-0.0010147	0.0026984	22		0.0037398	0.00354201	9		0.000106978	0.00232913	9			-1.00108e-05	0.00158661	13
-1.8	0.000423036	0.00236234	22		-0.00414348	0.00348073	9		0.00571999	0.00121563	9			-0.00280849	0.00332289	13
-1.7	0.00506208	0.00149261	22		-0.00732338	0.00347901	9		-0.00218866	0.00309179	9			-0.00183724	0.00195631	13
-1.6	0.00324027	0.00209957	22		0.000300412	0.0017779	9		0.0056877	0.00186564	9			0.00216899	0.00209951	13
-1.5	-0.00205162	0.00180065	22		0.000937655	0.00311261	9		-0.00326079	0.00181399	9			-0.00332363	0.00327988	13
-1.4	0.00214069	0.0031284	22		-0.00397067	0.00276174	9		0.00628032	0.00168059	9			-0.00284692	0.00182061	13
-1.3	-0.00199581	0.00295421	22		0.00140887	0.00359628	9		-0.00474822	0.00184919	9			-0.00189901	0.00193096	13
-1.2	0.0015312	0.00196088	22		0.00597899	0.00295847	9		0.00026846	0.00253871	9			0.00106142	0.00230719	13
-1.1	-9.72123e-05	0.00231237	22		0.00230515	0.00386164	9		-0.00553164	0.00208798	9			-0.00920259	0.00258831	13
-1	-0.00613922	0.00221722	22		-0.0113133	0.00373786	9		0.000467651	0.0028351	9			-0.00362379	0.00180533	13
-0.9	-8.73927e-05	0.00221148	22		-0.00179041	0.00262212	9		-0.00457103	0.00233105	9			-0.00364254	0.00343486	13
-0.8	-0.000775533	0.00244596	22		0.00164593	0.0018499	9		-0.00136558	0.00279179	9			-0.00971214	0.0026682	13
-0.7	-0.00429616	0.00192969	22		-0.00143336	0.0041241	9		-0.00635455	0.00211315	9			-0.00949049	0.0035882	13
-0.6	-0.00924212	0.00225819	22		-0.00176156	0.00225941	9		-0.00193744	0.00159694	9			-0.00895001	0.00266399	13
-0.5	-0.00492615	0.00221358	22		-0.00359212	0.00616721	9		-0.01114	0.00183277	9			-0.00776315	0.00359418	13
-0.4	-0.00412294	0.002044	22		0.006524	0.00283264	9		-0.000552639	0.0022903	9			-0.00676084	0.00429655	13
-0.3	-0.00129412	0.00262063	22		0.002939	0.00390697	9		-0.00861626	0.00205087	9			-0.0108521	0.00267511	13
-0.2	-0.00888149	0.00182383	22		0.000657379	0.00428224	9		-0.00691821	0.00296	9			-0.0107942	0.0033926	13
-0.1	-0.00722255	0.00228434	22		-0.00967953	0.00496043	9		-0.0161755	0.00296781	9			-0.00786019	0.00318106	13
0	-0.00744087	0.00217764	22		-0.0117049	0.00292143	9		-0.00881948	0.00243255	9			-0.0110359	0.00280065	13
0.0999999	-0.00744966	0.00230996	22		-0.00437339	0.00345525	9		-0.0116172	0.00574844	9			-0.0122496	0.00371526	13
0.2	0.000338865	0.00269907	22		-0.00272417	0.0042747	9		-0.00133257	0.00510666	9			-0.0123602	0.00364151	13
0.3	-0.00189508	0.0030659	22		0.00250654	0.00580589	9		-0.00649244	0.00548457	9			-0.0148573	0.00401514	13
0.4	0.00367646	0.00612059	22		-0.000939411	0.00648618	9		-0.00157931	0.00703204	9			-0.00776889	0.00355244	13
0.5	0.01572	0.0076648	22		-0.00615403	0.00668765	9		0.00449147	0.00671191	9			-0.017017	0.00417521	13
0.6	0.0293715	0.0102696	22		-0.00505471	0.00516778	9		0.00803283	0.00914416	9			-0.00700631	0.00299544	13
0.7	0.0312195	0.0103093	22		-0.00699425	0.00328636	9		0.00934415	0.00963675	9			-0.0137874	0.00368078	13
0.8	0.0365963	0.0121508	22		-0.00922734	0.00493797	9		0.0183234	0.0122526	9			-0.00795718	0.00294984	13
0.9	0.0502673	0.0139525	22		-0.00480252	0.00451926	9		0.0191436	0.0145323	9			-0.00439667	0.00404523	13
1	0.0666847	0.0160535	22		-0.00721739	0.00763007	9		0.0301782	0.0176543	9			-0.00709061	0.00377997	13
1.1	0.0689804	0.0164527	22		0.00780083	0.00799936	9		0.0289372	0.0181309	9			-0.00865278	0.00328961	13
1.2	0.0745941	0.0178023	22		0.00293803	0.00646344	9		0.0387154	0.0215243	9			-0.00772204	0.003686	13
1.3	0.0905829	0.0185761	22		-0.0037209	0.00790374	9		0.0436793	0.0232445	9			-0.013144	0.00598295	13
1.4	0.100342	0.0190661	22		0.00103129	0.00727582	9		0.048006	0.0261605	9			-0.00951873	0.00368039	13
1.5	0.114088	0.0202874	22		-0.00842433	0.00433728	9		0.0456153	0.0254589	9			-0.00490029	0.00504701	13
1.6	0.115034	0.0200237	22		-0.00512205	0.00582687	9		0.0559785	0.0288178	9			-0.00539929	0.00533535	13
1.7	0.124278	0.0207776	22		-0.00343685	0.00677315	9		0.0566853	0.0285918	9			-0.0031395	0.00596263	13
1.8	0.138726	0.0223343	22		-0.00293753	0.00931867	9		0.0651685	0.0318958	9			-0.00158351	0.00554284	13
1.9	0.15171	0.022817	22		0.00336442	0.00861246	9		0.06512	0.0323488	9			-0.0059247	0.00589495	13
2	0.158174	0.0243444	22		0.00477925	0.00757857	9		0.0663905	0.0347302	9			-0.00466275	0.0047524	13
2.1	0.162881	0.0245283	22		0.00512808	0.00944391	9		0.0654652	0.0355047	9			-0.00488914	0.00615717	13
2.2	0.169665	0.0245662	22		-0.000416645	0.00803271	9		0.0706361	0.0372602	9			-0.000290741	0.00637206	13
2.3	0.177423	0.0252367	22		-0.000989294	0.00398313	9		0.072653	0.0359887	9			-0.0041358	0.00622552	13
2.4	0.179209	0.0265638	22		-0.003635	0.00461518	9		0.0765964	0.036303	9			-0.00296825	0.00476285	13
2.5	0.182475	0.0271064	22		-0.0024826	0.00731815	9		0.0740871	0.0356205	9			-0.00022557	0.00445291	13
2.6	0.186569	0.0271919	22		-0.000329636	0.0109664	9		0.0778075	0.0382305	9			-0.00431208	0.00548467	13
2.7	0.189854	0.0257687	22		0.00446004	0.0079762	9		0.0714968	0.0365225	9			-0.0106231	0.00632901	13
2.8	0.188184	0.0263202	22		-0.00189456	0.00597484	9		0.0797296	0.0394201	9			-0.00548614	0.0052929	13
2.9	0.189381	0.0261941	22		-0.000353337	0.00773748	9		0.0729098	0.0369285	9			-0.0102361	0.00467381	13
3	0.189892	0.0259849	22		-0.000209106	0.0070072	9		0.0806812	0.040657	9			-0.00467816	0.00621987	13
3.1	0.191909	0.0273072	22		-0.00668516	0.00739339	9		0.0742439	0.0386733	9			-0.0122574	0.00676364	13
3.2	0.195659	0.0276003	22		-0.00747811	0.0066439	9		0.0854837	0.0419674	9			-0.00796941	0.00822162	13
3.3	0.190896	0.0254647	22		-0.00571074	0.00841354	9		0.0852078	0.0408508	9			-0.0149063	0.00632223	13
3.4	0.182193	0.0276807	22		0.0036977	0.00997029	9		0.0792873	0.0411544	9			-0.0153284	0.00746933	13
3.5	0.186932	0.0270004	22		-0.00241945	0.00881031	9		0.0770006	0.039336	9			-0.0100878	0.00645598	13
3.6	0.185836	0.0269792	22		-0.00524191	0.00830803	9		0.0838299	0.0411634	9			-0.0090428	0.00820612	13
3.7	0.190807	0.0262063	22		-0.00516979	0.00828847	9		0.0780003	0.0406292	9			-0.00776806	0.00771801	13
3.8	0.19103	0.0277279	22		0.00195844	0.00745395	9		0.0843729	0.0412341	9			-0.00733645	0.00851317	13
3.9	0.189697	0.0268182	22		-0.00445461	0.00777629	9		0.077115	0.0395914	9			-0.0116272	0.00731603	13
4	0.185699	0.0268195	22		-0.013574	0.00535254	9		0.0816493	0.0419215	9			-0.0120179	0.0078548	13
4.1	0.194383	0.0279234	22		-0.00737573	0.00892026	9		0.0757591	0.0391408	9			-0.0115458	0.00705624	13
4.2	0.185764	0.0270337	22		0.00251115	0.00956726	9		0.081977	0.0382101	9			-0.0171415	0.0068863	13
4.3	0.183935	0.0280513	22		-0.00376123	0.00745948	9		0.0774419	0.0391869	9			-0.0148056	0.00606889	13
4.4	0.181699	0.0265318	22		0.000412934	0.0077099	9		0.0837819	0.0394866	9			-0.0104225	0.00810703	13
4.5	0.185698	0.0273678	22		-0.00886492	0.00838093	9		0.0736813	0.0397653	9			-0.0123348	0.00874059	13
4.6	0.190119	0.027571	22		-0.00179505	0.00659399	9		0.0737709	0.0396099	9			-0.0134716	0.00955799	13
4.7	0.182174	0.0267526	22		-0.00352018	0.00718259	9		0.0730631	0.0380403	9			-0.0108038	0.00781636	13
4.8	0.182866	0.0273758	22		-0.0153387	0.00747526	9		0.0750053	0.0427295	9			-0.0142705	0.00766899	13
4.9	0.18037	0.0268529	22		-0.00524528	0.00999431	9		0.0694872	0.0393414	9			-0.0159863	0.00787983	13
5	0.184928	0.02612	22		0.00164918	0.0101381	9		0.070736	0.040713	9			-0.00736662	0.00915717	13
