# Supplementary material for: Synaptic mitochondria regulate hair-cell synapse size and function
Source: eLife journal article supplement (doi:10.7554/elife.48914), 2019-10-14
Supplement: supp [file elife-48914-supp-v1.zip › elife_poa_e48914_Figure_2_figure_supplement_1_source_data_1.xlsx]

## Sheet: Figure 2-figure sup 1B
Figure 2-figure supplement 1B
bundle GCaMP6s AVG traces
Naïve					Ru360 10μM					TRO 19622 10μM
Time (sec)	Mean	SEM	n		Time (sec)	Mean	SEM	n		Time (sec)	Mean	SEM	n
-1.9	0.00968534	0.00479923	88		-1.9	0.00695041	0.00514956	49		-1.9	-0.000146202	0.00420639	39
-1.85	0.0097791	0.00461984	88		-1.85	0.00237535	0.00450025	49		-1.85	-0.00392013	0.00399771	39
-1.8	0.00669926	0.00411883	88		-1.8	0.00353424	0.00416855	49		-1.8	0.00691134	0.00352466	39
-1.75	0.00555778	0.0042679	88		-1.75	0.0101529	0.0043589	49		-1.75	0.00127102	0.0037631	39
-1.7	0.00520839	0.00427576	88		-1.7	0.00624588	0.00437795	49		-1.7	0.000892709	0.00306083	39
-1.65	0.00863549	0.00435987	88		-1.65	-0.000681936	0.00329017	49		-1.65	0.00463184	0.00337645	39
-1.6	0.00332513	0.00389423	88		-1.6	-0.000473994	0.00343584	49		-1.6	0.000563025	0.00293268	39
-1.55	0.00851127	0.00349036	88		-1.55	-0.00288308	0.00269699	49		-1.55	0.00204721	0.00354751	39
-1.5	0.00696856	0.00334114	88		-1.5	0.00747133	0.00355757	49		-1.5	-0.000608672	0.00305048	39
-1.45	0.00273365	0.00307956	88		-1.45	-0.000342445	0.00375616	49		-1.45	-0.00173394	0.00318135	39
-1.4	0.00174998	0.00302878	88		-1.4	-0.00469285	0.00316286	49		-1.4	-0.00151336	0.00328267	39
-1.35	0.00287457	0.00245098	88		-1.35	-0.000499866	0.00240664	49		-1.35	-0.00341235	0.00295557	39
-1.3	0.00406668	0.00289301	88		-1.3	-0.00246771	0.00371674	49		-1.3	-0.00643802	0.00352236	39
-1.25	0.000568768	0.00255183	88		-1.25	-0.00613735	0.00341004	49		-1.25	5.06216e-05	0.00368224	39
-1.2	-0.00652194	0.00242453	88		-1.2	-0.0048552	0.00355329	49		-1.2	-0.0107918	0.0026316	39
-1.15	-0.00866631	0.00230769	88		-1.15	-0.00382545	0.00340097	49		-1.15	-0.0100135	0.0029965	39
-1.1	-0.00853536	0.00271253	88		-1.1	-0.00551159	0.0035417	49		-1.1	-0.00455577	0.00300855	39
-1.05	-0.00383214	0.00258365	88		-1.05	0.00122357	0.00349835	49		-1.05	-0.00667723	0.00357759	39
-1	-0.00359348	0.00274264	88		-1	-0.00427814	0.00439429	49		-1	-0.00934352	0.00362165	39
-0.95	-0.00733193	0.00306788	88		-0.95	-0.00384158	0.00399044	49		-0.95	-0.0149499	0.00376268	39
-0.9	-0.0120872	0.00245836	88		-0.9	-0.00483351	0.00303426	49		-0.9	-0.0162998	0.0036897	39
-0.85	-0.00562431	0.00240394	88		-0.85	-0.00635457	0.00300382	49		-0.85	-0.0106432	0.00288368	39
-0.8	-0.00364524	0.00269616	88		-0.8	-0.00572319	0.00358145	49		-0.8	-0.0146917	0.00316274	39
-0.75	-0.0049023	0.00274482	88		-0.75	-0.00860678	0.00344635	49		-0.75	-0.0126467	0.00280361	39
-0.7	-0.00727512	0.00301217	88		-0.7	-0.00214646	0.00320748	49		-0.7	-0.0137433	0.00241371	39
-0.65	-0.00572403	0.00295314	88		-0.65	-0.00529134	0.00307668	49		-0.65	-0.0194622	0.00345023	39
-0.6	-0.0118437	0.00318532	88		-0.6	-0.00310719	0.0034761	49		-0.6	-0.0149964	0.00337675	39
-0.55	-0.00870849	0.00283323	88		-0.55	-0.00479633	0.00396503	49		-0.55	-0.0155113	0.00317918	39
-0.5	-0.0086953	0.00359261	88		-0.5	-0.0116692	0.00314254	49		-0.5	-0.0179085	0.00302269	39
-0.45	-0.00675567	0.0026477	88		-0.45	-0.00703285	0.00337266	49		-0.45	-0.0142007	0.00354819	39
-0.4	-0.00806209	0.00310779	88		-0.4	-0.0062603	0.00331768	49		-0.4	-0.0104094	0.0031647	39
-0.35	-0.0138031	0.00367492	88		-0.35	-0.00846412	0.0029244	49		-0.35	-0.013519	0.00276917	39
-0.3	-0.00892129	0.00357048	88		-0.3	-0.00590268	0.00312672	49		-0.3	-0.0130206	0.0035842	39
-0.25	-0.0104012	0.00370188	88		-0.25	-0.010089	0.00285155	49		-0.25	-0.0188093	0.0035014	39
-0.2	-0.00873128	0.00367862	88		-0.2	-0.00857481	0.00370822	49		-0.2	-0.00852111	0.00357597	39
-0.15	-0.0106377	0.00358792	88		-0.15	-0.00905453	0.00406442	49		-0.15	-0.0161878	0.00311121	39
-0.1	-0.015369	0.00382457	88		-0.1	-0.00697386	0.00352013	49		-0.1	-0.0178362	0.00389201	39
-0.05	-0.0111987	0.00359893	88		-0.05	-0.0126315	0.00401014	49		-0.05	-0.00953055	0.00371975	39
2.22045e-16	-0.0147615	0.00437509	88		2.22045e-16	-0.00479591	0.00360792	49		2.22045e-16	-0.0128503	0.00261349	39
0.05	0.139264	0.0177404	88		0.05	0.134846	0.0229694	49		0.05	0.328525	0.0375707	39
0.1	0.412563	0.0354723	88		0.1	0.550593	0.0617681	49		0.1	0.645994	0.0694435	39
0.15	0.410161	0.0369747	88		0.15	0.556477	0.0560793	49		0.15	0.625771	0.0677472	39
0.2	0.41998	0.040273	88		0.2	0.565297	0.0575242	49		0.2	0.634307	0.0687381	39
0.25	0.410891	0.0426798	88		0.25	0.577338	0.0661833	49		0.25	0.672453	0.0698318	39
0.3	0.398758	0.042181	88		0.3	0.56531	0.0690101	49		0.3	0.63644	0.0663231	39
0.35	0.378029	0.040102	88		0.35	0.546645	0.0645186	49		0.35	0.591745	0.0643469	39
0.4	0.355803	0.0377688	88		0.4	0.502375	0.0602263	49		0.4	0.538896	0.0592408	39
0.45	0.340571	0.036161	88		0.45	0.470732	0.0568885	49		0.45	0.490448	0.0553061	39
0.5	0.312502	0.0340631	88		0.5	0.431852	0.0522659	49		0.5	0.452148	0.0508789	39
0.55	0.291666	0.0318487	88		0.55	0.400397	0.048149	49		0.55	0.414683	0.0474545	39
0.6	0.270128	0.0300278	88		0.6	0.370115	0.044732	49		0.6	0.380683	0.0431374	39
0.65	0.253176	0.0278573	88		0.65	0.341059	0.0413898	49		0.65	0.358921	0.0405978	39
0.7	0.229796	0.0265384	88		0.7	0.315688	0.0380353	49		0.7	0.319439	0.0370662	39
0.75	0.20996	0.0252902	88		0.75	0.282033	0.0350827	49		0.75	0.29519	0.0341917	39
0.8	0.200689	0.0235858	88		0.8	0.252907	0.0329278	49		0.8	0.275422	0.0305785	39
0.85	0.190354	0.0219728	88		0.85	0.244776	0.0301845	49		0.85	0.250806	0.0286533	39
0.9	0.173101	0.0205489	88		0.9	0.23003	0.0274219	49		0.9	0.225201	0.0269653	39
0.95	0.159636	0.0200703	88		0.95	0.207219	0.0257577	49		0.95	0.203924	0.0242842	39
1	0.14838	0.0185194	88		1	0.193521	0.0239741	49		1	0.190569	0.022561	39
1.05	0.141063	0.0176824	88		1.05	0.184371	0.0223344	49		1.05	0.181422	0.0223379	39
1.1	0.13376	0.0167959	88		1.1	0.175605	0.0214756	49		1.1	0.169375	0.0206651	39
1.15	0.123585	0.0166427	88		1.15	0.163997	0.0211129	49		1.15	0.153468	0.0186476	39
1.2	0.11979	0.0157359	88		1.2	0.145382	0.018424	49		1.2	0.150287	0.0181725	39
1.25	0.109506	0.0152109	88		1.25	0.141089	0.0176038	49		1.25	0.140518	0.01723	39
1.3	0.101781	0.0145524	88		1.3	0.136458	0.0164041	49		1.3	0.12903	0.0163259	39
1.35	0.0991012	0.014574	88		1.35	0.128164	0.0159173	49		1.35	0.128818	0.0152612	39
1.4	0.0909355	0.0144177	88		1.4	0.121035	0.0144554	49		1.4	0.116925	0.0154665	39
1.45	0.0799956	0.0138063	88		1.45	0.107011	0.0149445	49		1.45	0.104724	0.0147017	39
1.5	0.0763031	0.0140341	88		1.5	0.0980312	0.0136089	49		1.5	0.0938224	0.0133295	39
1.55	0.072027	0.0131994	88		1.55	0.0909338	0.0138011	49		1.55	0.0891107	0.0125753	39
1.6	0.0683217	0.0133964	88		1.6	0.0874605	0.0126863	49		1.6	0.0869331	0.0134297	39
1.65	0.0593826	0.0131269	88		1.65	0.0826007	0.012778	49		1.65	0.0783999	0.0118775	39
1.7	0.059782	0.0126427	88		1.7	0.0826065	0.0118801	49		1.7	0.0727765	0.0107595	39
1.75	0.0568	0.0126318	88		1.75	0.0766736	0.0124951	49		1.75	0.0728364	0.0106676	39
1.8	0.0510565	0.0124153	88		1.8	0.0712654	0.0117154	49		1.8	0.0626451	0.0108413	39
1.85	0.0492539	0.0123178	88		1.85	0.0687114	0.0126194	49		1.85	0.0569162	0.0114709	39
1.9	0.0418262	0.0123155	88		1.9	0.0669191	0.012058	49		1.9	0.0505783	0.0109483	39
1.95	0.0412051	0.0123325	88		1.95	0.0633627	0.0118692	49		1.95	0.0512862	0.0109296	39
2	0.0394937	0.0121882	88		2	0.0595554	0.0114515	49		2	0.0484963	0.00970309	39
2.05	0.0319397	0.0117562	88		2.05	0.0530272	0.00991501	49		2.05	0.0442586	0.00991246	39
2.1	0.028688	0.011853	88		2.1	0.0559367	0.0105646	49		2.1	0.0442586	0.00902091	39
2.15	0.0304053	0.0114975	88		2.15	0.048733	0.0107819	49		2.15	0.0408564	0.00879921	39
2.2	0.0306832	0.0113656	88		2.2	0.0458722	0.0113154	49		2.2	0.0372962	0.00864619	39
2.25	0.0264256	0.0114252	88		2.25	0.0441553	0.0103907	49		2.25	0.0373382	0.00868644	39
2.3	0.0218744	0.012206	88		2.3	0.0428314	0.0114988	49		2.3	0.032347	0.00886544	39
2.35	0.0236145	0.0117599	88		2.35	0.0393842	0.0107447	49		2.35	0.0307259	0.00793215	39
2.4	0.0204487	0.0115509	88		2.4	0.0469384	0.0106235	49		2.4	0.0269355	0.0088702	39
2.45	0.0126049	0.0110949	88		2.45	0.0388474	0.0104293	49		2.45	0.0199623	0.00935416	39
2.5	0.00907202	0.011059	88		2.5	0.0379451	0.0111505	49		2.5	0.0133687	0.00823406	39
2.55	0.0139923	0.0120261	88		2.55	0.0307684	0.0103213	49		2.55	0.0219551	0.00855082	39
2.6	0.0122757	0.0116613	88		2.6	0.0312838	0.0096961	49		2.6	0.0171991	0.00875412	39
2.65	0.00615121	0.0109951	88		2.65	0.0298361	0.011106	49		2.65	0.0161218	0.00775753	39
2.7	0.00910782	0.0118027	88		2.7	0.0317784	0.0111573	49		2.7	0.0134097	0.00782087	39
2.75	0.00644062	0.0114496	88		2.75	0.0230903	0.0110321	49		2.75	0.0135923	0.00760753	39
2.8	0.00177542	0.0115968	88		2.8	0.023325	0.0109218	49		2.8	0.0149539	0.00786218	39
2.85	-0.00222895	0.0118036	88		2.85	0.0251382	0.0104693	49		2.85	0.00847229	0.00732968	39
2.9	8.85201e-05	0.0121741	88		2.9	0.0194798	0.0107708	49		2.9	0.0150002	0.00803113	39
2.95	-0.00161384	0.0119274	88		2.95	0.0161449	0.00989937	49		2.95	0.00651854	0.00741574	39
3	-0.00395004	0.0119218	88		3	0.0133217	0.0105219	49		3	0.00569926	0.00712131	39
3.05	-0.00578459	0.0114898	88		3.05	0.0196539	0.011276	49		3.05	0.000849008	0.00778182	39
3.1	-0.00766596	0.0119768	88		3.1	0.0157056	0.0110677	49		3.1	0.00476618	0.00769806	39
3.15	-0.0111706	0.0120313	88		3.15	0.0135272	0.0104475	49		3.15	0.00330596	0.00812814	39
3.2	-0.0103598	0.0119997	88		3.2	0.01374	0.0117379	49		3.2	0.0051426	0.00772992	39
3.25	-0.0147308	0.0112794	88		3.25	0.0175271	0.0104729	49		3.25	-0.0063508	0.00723608	39
3.3	-0.0130157	0.0120139	88		3.3	0.0142529	0.0104819	49		3.3	0.00386709	0.00799759	39
3.35	-0.0159452	0.0116379	88		3.35	0.0149714	0.00984981	49		3.35	-0.0112376	0.00830843	39
3.4	-0.0140066	0.0116405	88		3.4	0.00895922	0.00935304	49		3.4	-0.00686777	0.00827737	39
3.45	-0.0170952	0.0116321	88		3.45	0.00905439	0.00943404	49		3.45	-0.00435133	0.00763029	39
3.5	-0.0176407	0.0112782	88		3.5	0.0121205	0.0116576	49		3.5	-0.00423808	0.00837292	39
3.55	-0.0143415	0.011833	88		3.55	0.0072269	0.0110061	49		3.55	-0.00880701	0.00821533	39
3.6	-0.0186271	0.0118322	88		3.6	0.00755462	0.0106505	49		3.6	-0.00633755	0.00735237	39
3.65	-0.0203314	0.0116644	88		3.65	0.00870744	0.0101951	49		3.65	-0.00908746	0.00836876	39
3.7	-0.0213921	0.0116303	88		3.7	0.00572797	0.0104861	49		3.7	-0.00586518	0.00836282	39
3.75	-0.0265666	0.0112417	88		3.75	0.0103637	0.0106343	49		3.75	-0.00581948	0.00776078	39
3.8	-0.0278785	0.0116504	88		3.8	0.00775639	0.00955362	49		3.8	-0.00395637	0.00750038	39
3.85	-0.0284152	0.0113947	88		3.85	0.00403412	0.0101961	49		3.85	-0.00908956	0.00787119	39
3.9	-0.0280796	0.0108038	88		3.9	0.00866181	0.0102011	49		3.9	-0.00760755	0.0075004	39
3.95	-0.0264773	0.0114978	88		3.95	0.0009411	0.00986157	49		3.95	-0.0108361	0.00704902	39
4	-0.0255152	0.0112489	88		4	0.00131267	0.0104919	49		4	-0.0113074	0.00716424	39
4.05	-0.0276833	0.0112258	88		4.05	0.00457327	0.0101047	49		4.05	-0.009475	0.00764973	39
4.1	-0.0323015	0.0108189	88		4.1	0.00263844	0.00964856	49		4.1	-0.0163289	0.00722305	39
4.15	-0.0341464	0.0106738	88		4.15	0.0055771	0.0100497	49		4.15	-0.0150164	0.00731585	39
4.2	-0.0294994	0.0110458	88		4.2	-0.000542001	0.00943486	49		4.2	-0.0114641	0.00846758	39
4.25	-0.0332675	0.0107776	88		4.25	-0.00115968	0.00936132	49		4.25	-0.0141335	0.00886446	39
4.3	-0.0345549	0.0106537	88		4.3	-0.00319379	0.0102519	49		4.3	-0.0162743	0.00866076	39
4.35	-0.0337555	0.0110922	88		4.35	-0.00350162	0.0103935	49		4.35	-0.0122975	0.00832215	39
4.4	-0.0321066	0.0109153	88		4.4	-0.00439028	0.010478	49		4.4	-0.0170368	0.0080224	39
4.45	-0.0379543	0.0103546	88		4.45	0.000834188	0.0106519	49		4.45	-0.0131148	0.00808105	39
4.5	-0.0389468	0.0103423	88		4.5	-0.00170958	0.0102397	49		4.5	-0.0166794	0.00836455	39
4.55	-0.0373499	0.0103361	88		4.55	-1.38006e-05	0.00996192	49		4.55	-0.0145744	0.00759726	39
4.6	-0.0360828	0.0110153	88		4.6	-0.00117094	0.0107219	49		4.6	-0.0160398	0.00814336	39
4.65	-0.0416031	0.00985658	88		4.65	-0.00453066	0.00983211	49		4.65	-0.0234986	0.00801588	39
4.7	-0.0388013	0.00995525	88		4.7	0.000832333	0.0107895	49		4.7	-0.0145127	0.00881216	39
4.75	-0.0410429	0.00978394	88		4.75	-0.00520636	0.0108018	49		4.75	-0.015218	0.00863063	39
4.8	-0.0448165	0.0100728	88		4.8	-0.00344405	0.0104592	49		4.8	-0.0210768	0.00877578	39
4.85	-0.0462552	0.010114	88		4.85	-0.00243877	0.0109822	49		4.85	-0.0245743	0.00837935	39
4.9	-0.0443237	0.00950942	88		4.9	0.000743941	0.0108001	49		4.9	-0.0189626	0.00856911	39
4.95	-0.0467921	0.00931748	88		4.95	-0.00159467	0.0098871	49		4.95	-0.0235705	0.00869716	39
5	-0.0495164	0.00913719	88		5	-0.00386979	0.0103593	49		5	-0.0286938	0.00823416	39
5.05	-0.0476281	0.00958857	88		5.05	-0.00650473	0.0101434	49		5.05	-0.0245416	0.00794791	39

## Sheet: Figure 2-figure sup 1Bi
Figure 2-figure supplement 1B'
max GCaMP6s bundle responses
		DMSO	Ru360 10μM		DMSO	TRO 19622 10μM
		1.963	0.9134		1.226	1.221
		0.6257	0.7187		0.7569	1.07
		0.3156	0.8727		0.428	1.093
		0.1964	0.6583		0.7458	1.229
		0.1903	1.094		0.7733	1.828
		0.1804	0.1385		0.4418	0.5097
		1.07	1.708		0.4352	0.878			Ru360 10uM 0.2s increase dot plot				TRO19622 10uM 0.2s increase dot plot
		0.2654	0.5139		0.9242	0.415
		0.6695	1.019		0.3523	0.2767		Column B	Ru360 10μM			Column B	TRO 19622 10μM
		0.4693	1.134		0.2245	0.1323		vs.	vs.			vs.	vs.
	**	1.033	0.5501		0.2429	0.06045		Column A	DMSO			Column A	DMSO
		0.1858	1.39		0.2869	0.3701
		0.1522	0.1263		0.1526	0.2442		Wilcoxon matched-pairs signed rank test				Wilcoxon matched-pairs signed rank test
		0.4031	0.7618		0.7181	1.545		P value	0.0026			P value	0.0029
		0.664	0.8467		0.4794	0.9808		Exact or approximate P value?	Exact			Exact or approximate P value?	Exact
		1.294	1.442		1.169	0.9179		P value summary	**			P value summary	**
		0.7246	1.267		1.298	1.267		Significantly different (P < 0.05)?	Yes			Significantly different (P < 0.05)?	Yes
		0.4009	0.845		0.2985	0.6744		One- or two-tailed P value?	Two-tailed			One- or two-tailed P value?	Two-tailed
		0.1849	0.2388		0.5774	1.411		Sum of positive, negative ranks	910.0 , -315.0			Sum of positive, negative ranks	599.0 , -181.0
		0.3221	0.4019		0.411	1.309		Sum of signed ranks (W)	595			Sum of signed ranks (W)	418
		1.79	1.73		0.4608	1.133		Number of pairs	49			Number of pairs	39
		0.6048	0.4119		0.1844	0.2187		Number of ties (ignored)	0			Number of ties (ignored)	0
		0.2945	0.428		0.5229	0.6788
		1.141	0.8707		0.1869	0.07007		Median of differences				Median of differences
		0.1679	0.1483		0.7409	0.7242		Median	0.0798			Median	0.148
		0.6038	0.8235		0.5292	0.9175
		0.1589	0.3732		0.3811	0.9063		How effective was the pairing?				How effective was the pairing?
		0.1992	0.2486		0.1713	0.121		rs (Spearman)	0.5748			rs (Spearman)	0.7081
		1.171	1.172		0.2551	0.607		P value (one tailed)	<0.0001			P value (one tailed)	<0.0001
		0.2918	0.0696		0.2533	0.5702		P value summary	****			P value summary	****
		0.1782	0.1289		0.2213	0.5902		Was the pairing significantly effective?	Yes			Was the pairing significantly effective?	Yes
		0.2056	0.08719		0.2343	0.883		Was the pairing significantly effective?	Yes			Was the pairing significantly effective?	Yes
		0.4122	0.3941		0.7672	0.9152
		0.2882	0.5971		0.6456	0.6711
		0.7951	0.6331		0.4082	0.4058
		0.2253	0.6056		1.475	0.937
		0.2646	0.6091		0.6907	0.5497
		0.2651	0.2138		0.3951	0.6393
		0.2028	0.1788		0.1925	0.08588
		0.54	0.5989
		1	0.8239
		0.1999	0.2311
		0.2096	0.09691
		0.1622	1.006
		0.2153	0.1995
		0.1811	1.16
		0.1614	0.2113
		0.4273	1.006
		0.6894	1.189

## Sheet: Figure 2-figure sup 1Ci
Figure 2-figure supplement 1C'
example presynaptic GCaMP6s responses
Time (sec)	ROI1	ROI2	ROI3	ROI4	ROI5
-1.95	7343.19	7742.11	8766.4	10730.4	7267.84
-1.9	7324.64	8210.35	8906.95	10896.5	7207.81
-1.85	7958.12	7959.68	8929.24	10425.4	7147.71
-1.8	7459.54	8203.7	9123.55	10839.5	7456.43
-1.75	7884.16	8224.09	9142.42	10418.8	6628.18
-1.7	7632.93	8112.44	9304.67	10965.8	7142.14
-1.65	7583.73	8182.56	9559.92	10872.1	7340.49
-1.6	7758.96	7994.11	9023.52	10659.5	7172.16
-1.55	7398.75	8313.3	9207.83	10926.2	7000.75
-1.5	7671.9	8024.77	9216.81	10808.7	7425.1
-1.45	7634.38	8308.01	9405.31	10892.3	7286.56
-1.4	8073.89	8253.6	9698.05	11001	6916.11
-1.35	7493.34	8244.41	9212.69	10610.2	7548.49
-1.3	7490.52	8314.05	8932	10920.6	6999.85
-1.25	7497.84	8140.86	9069.58	10408.2	7284.16
-1.2	7594.9	7915.65	9011.5	10646.1	6556.9
-1.15	7690.77	7863.61	8501.1	9736.84	6820.11
-1.1	7706.8	8277.25	8508.04	10417	7548.85
-1.05	7890.6	8075.56	8840.54	9968.62	6361.36
-1	8131.57	8039.39	8647.54	10077.4	6776.02
-0.95	7940.01	8262.56	8669.56	10060.2	7051.59
-0.9	7321.6	7913.91	9499.54	10164.3	6949.5
-0.85	7741.84	8086.69	8793.81	10310.5	6810.62
-0.8	7635.31	8026.35	8805.06	10229.6	7108.25
-0.75	7809.65	8066.77	8736.69	10178.8	7133.21
-0.7	7763.61	8139.55	8783.8	9836.09	6532.88
-0.65	7342.3	8139.32	9173.56	9897.36	6968.81
-0.6	7589.93	7861.14	8414.27	9827.56	6870.99
-0.55	7140.36	8075.79	8738.02	10102.9	6779.62
-0.5	7660.8	8134.35	8733.91	9982.26	6785.55
-0.45	7761.66	8060.75	8114.98	10136.4	6719.12
-0.4	7506.84	7910.41	8357.81	10169.1	6647.43
-0.35	7442.49	8227.23	8380.36	10009.5	6794.19
-0.3	7639.71	8126.27	8538.62	10122.3	6625.04
-0.25	8124.26	8166.5	8664.26	9631.06	6503.2
-0.2	7760.01	7972.05	8447.19	9733.9	6699.43
-0.15	7880.91	8233.61	8248.85	9835.67	6786.3
-0.0999999	7690.26	7989.54	8442	9753.52	6747.8
-0.05	7421.14	8350.56	8490.19	9972.6	6742.99
0	8471.04	9539.62	9520.09	11588.7	7840.15
0.05	9555.39	11608.4	9887.41	12299.6	8988.04
0.0999999	10167.9	13564.2	10421.3	13398	9325.26
0.15	10792.2	14351.2	10861.3	13530.7	9810.19
0.2	10780.9	13805.7	10616.1	12265.9	8939.31
0.25	10295	13309.1	10178.5	12120.4	8672.16
0.3	9777.91	12440.8	9813.45	11528.4	8427.02
0.35	9984.38	12631.8	9451.67	11225.1	8463.64
0.4	9325.79	12384	9408.12	11452.7	8285.67
0.45	9410.77	12226.2	9486.83	11174.2	8033.61
0.5	9410.86	11889.5	8890.12	10755.4	8053.54
0.55	9244	11885.7	9536.61	10545.3	7715.02
0.6	8849.86	11077.3	9104.49	10685.5	7662.66
0.65	9145.3	11272	9234.3	10086.5	7332.11
0.7	8793.16	10985.9	9544.19	10589.3	7867.57
0.75	8824.7	10734.2	9303.02	10378.5	7731.88
0.8	8846.34	10519.6	9061.96	10124.7	7731.99
0.85	9007.92	10618.3	8780.58	10349.7	7384.35
0.9	8763.2	10744.4	9052.06	10319.9	7567.34
0.95	8588.36	10167	9472.8	10459.3	6972.7
1	8407.1	10118.5	8562.61	10569.8	7452.23
1.05	8653.3	10692.4	8554.79	9955.44	7111.52
1.1	8593.36	10338	9023.34	10137	6928.38
1.15	8349.73	9813.11	9194.01	10317.9	7455.96
1.2	8474.73	10428.5	8861.89	10288.1	7474.54
1.25	8426.64	9952.09	8490.02	9708.84	7128.02
1.3	8214.81	9724.66	8871.34	9756.92	7261.35
1.35	8478.7	9737	8829.34	9501	6799.41
1.4	8338.76	9667.5	8819.71	9811.14	6831.86
1.45	8541.66	9911.33	8970.83	10492	7121.39
1.5	8479.91	9295.49	8698.85	9737.06	6800.14
1.55	8318.91	9813.46	8283.01	9662.7	7146.4
1.6	7892.85	9537.58	8619.85	9897.62	7063.8
1.65	8158.41	9798.79	8938.77	9022.11	7013.27
1.7	7897.75	10015.6	8642.3	9776.02	7030.38
1.75	7807.62	9854.19	8776.99	9789.29	7050.34
1.8	7236.52	9966.31	8306.66	9558.56	7060.84
1.85	7582.19	9725.5	8395.12	9436.94	7054.79
1.9	7889.62	9228.41	8590.49	9412.84	6784.55
1.95	7896.68	8976.81	8729.66	8930.24	6722.74
2	7730.32	9079.73	8197.44	9220.02	6480.66
2.05	7599.62	8809.46	8413.91	9065.29	6779.3
2.1	7440.06	8922.86	8572.76	9231.42	6504.05
2.15	8028.39	8952.79	8290.12	8955.26	6684.4
2.2	7738.62	8926.1	8306.39	8831.66	6759.71
2.25	7763.79	8491.71	8422.54	9239.84	6375.57
2.3	7690.35	9205.31	8357.3	9346.2	6535.36
2.35	7443.14	8852.96	8416.08	9104.42	6559.3
2.4	7831.52	9024.98	8086.26	8942.65	6292.77
2.45	7636.12	8988.41	8612.79	9138.55	6000.16
2.5	7680.3	8734.5	8547.17	9550.98	6702.6
2.55	7504.55	9199.25	8283.75	9806.81	6759.2
2.6	7455.74	8453.54	8359.77	9070.92	6285.41
2.65	7614.81	8781.83	8393.77	9253.21	6265.1
2.7	7306.41	8790.66	8275.77	9158.6	6620.6
2.75	7381.39	8859.36	8235.04	9119.01	6425.79
2.8	7417	9039.88	8128.65	8854.99	6411.8
2.85	7230.34	8801.21	8422.76	9104.19	6098.11
2.9	7052.39	8702.4	8913.41	9338.89	6214.41
2.95	7255.2	8470.06	7893.3	9200.15	6308.75
3	7399.93	9071.7	8153.48	9444.46	6227.59
3.05	7319.99	8713.36	8154.68	9340.46	6433.29
3.1	7440.84	8754.17	8426.62	8963.65	6197.18
3.15	7368.26	8656.88	8201.84	9113.4	6040.61
3.2	7246.32	8793	8210.94	8564.25	6502.48
3.25	7493.5	8358.12	8119.09	8623.8	6444.89
3.3	7061.18	8370.36	8223.73	8844.51	6060.34
3.35	7235.34	8513.99	8120.09	9394	6289.23
3.4	7340.32	8388.98	8428.27	8793.27	6293.2
3.45	7335.07	8119.14	8518.17	8984.44	6387.69
3.5	7395.32	8597.04	8074.4	8562.64	6156.76
3.55	7054.65	8369.59	8121.27	9016.11	6211.34
3.6	7202.07	8582.91	8566.08	9163.45	6424.48
3.65	7121.91	8271.16	8236.08	9374.79	6312.15
3.7	7055.99	8277.71	8179.79	9107.59	6091.41
3.75	7060.21	8188.99	8140.23	8951.09	6154.81
3.8	6924.56	8199.58	8307.9	9190.08	6329.5
3.85	7047.96	7972.6	8331.21	9408.46	6269.24
3.9	7399.94	8281.45	8436.38	9317.33	6364.91
3.95	6959.05	8081.6	7852.86	9393.94	6503.38
4	7237.46	8731.49	8589.34	8895.15	6321.07
4.05	7448.3	8145.31	8513.31	8999.19	6507.3
4.1	6946.94	8538.48	7783.76	9231.85	6375.32
4.15	7156.25	8497.92	8186.23	8658.96	6337.85
4.2	6929.31	8500.51	8335.06	8822.46	6362.16
4.25	7239.9	8479.73	8326.61	8704.8	6458.8
4.3	6968.05	8612.14	7949.98	8670.71	6453.86
4.35	6629.15	8658.55	8030.99	8469.45	6185.82
4.4	7303.75	8572.3	8027.24	8461.09	6488.88
4.45	6813.32	8504.46	7979.07	8871.81	6497.43
4.5	6675.2	8329.52	8019.5	8615.7	6319.41
4.55	6902.94	8312.51	7987.74	8578.56	6277.26
4.6	7017.61	8462.27	8065.61	8524.6	6118.44
4.65	6990.41	8181.62	8035.98	8386.2	6511.95
4.7	6283.2	8753.98	7729.06	8956.79	6123.12
4.75	6692.23	8424.75	7919.77	8346.92	5876.98
4.8	6940.73	7959.86	8005.95	8727.85	6059.34
4.85	6862.46	8500.85	7902.4	8640.16	6165.02
4.9	6777.74	8823.26	7791.26	8770.69	6380.34
4.95	6939.14	8107.84	7845.88	8259.92	5899.3
5	7202.25	8050	7693.57	8287.06	6235.91

## Sheet: Figure 2-figure sup 1D
Figure 2-figure supplement 1D
AVG GCaMP6s presynaptic responses 0.2s stim
Pre-treatment						TRO 19622 10μM
Time (sec)	Mean	SEM	n			Time (sec)	Mean	SEM	n
-1.95	0.0053652	0.011727	17			-1.95	0.0120141	0.00499648	17
-1.9	-0.00430525	0.0071696	17			-1.9	0.00349562	0.0050677	17
-1.85	0.00892795	0.00663808	17			-1.85	0.00862489	0.00556216	17
-1.8	0.00513571	0.00639696	17			-1.8	0.00679096	0.00556736	17
-1.75	0.00576177	0.00544322	17			-1.75	0.00675613	0.00437199	17
-1.7	0.00384403	0.00708971	17			-1.7	0.00746986	0.00420836	17
-1.65	0.0110042	0.00668528	17			-1.65	0.00775678	0.00299828	17
-1.6	0.00939255	0.00687451	17			-1.6	0.000518646	0.00345643	17
-1.55	0.00148398	0.00552743	17			-1.55	0.00259243	0.00424415	17
-1.5	0.0158758	0.00628462	17			-1.5	-0.000783601	0.00479694	17
-1.45	0.00391579	0.00697262	17			-1.45	0.00410594	0.00515237	17
-1.4	0.0130631	0.00646664	17			-1.4	-0.0018754	0.00324565	17
-1.35	0.0110324	0.00619116	17			-1.35	-0.00231337	0.0068463	17
-1.3	0.00403707	0.00676137	17			-1.3	0.00331172	0.00530942	17
-1.25	-0.00143592	0.00585839	17			-1.25	-0.00121134	0.00410827	17
-1.2	0.00200221	0.00615469	17			-1.2	-0.000954201	0.00449112	17
-1.15	0.00739772	0.00633978	17			-1.15	-0.00353885	0.00389236	17
-1.1	-0.00205723	0.00673215	17			-1.1	0.000751001	0.00445921	17
-1.05	0.00632186	0.00412026	17			-1.05	-0.00794598	0.00375115	17
-1	-0.00151833	0.00510893	17			-1	0.00100322	0.00646545	17
-0.95	-0.00147756	0.00423351	17			-0.95	0.00325156	0.00498088	17
-0.9	0.00281706	0.00420251	17			-0.9	-0.00313999	0.00645388	17
-0.85	-0.00177188	0.0042924	17			-0.85	-0.00372564	0.00449063	17
-0.8	-0.00674167	0.0049106	17			-0.8	-0.00533943	0.00404766	17
-0.75	-0.00265768	0.00459276	17			-0.75	-0.0059793	0.00249802	17
-0.7	-0.004542	0.00361549	17			-0.7	-0.0117417	0.00497861	17
-0.65	-0.00602366	0.00436886	17			-0.65	0.00302904	0.00505995	17
-0.6	0.000397137	0.00532989	17			-0.6	-0.00944278	0.00483	17
-0.55	-0.0159011	0.00525765	17			-0.55	-4.53014e-05	0.00372748	17
-0.5	-0.014163	0.00615266	17			-0.5	-0.00339628	0.00545177	17
-0.45	-0.00058023	0.00529913	17			-0.45	-0.000128217	0.00311206	17
-0.4	-0.00855991	0.005405	17			-0.4	0.0043545	0.00339685	17
-0.35	-0.00887362	0.00765997	17			-0.35	0.00331525	0.00527496	17
-0.3	-0.0178706	0.00614931	17			-0.3	-0.000498883	0.00527843	17
-0.25	-0.0122786	0.00554814	17			-0.25	-0.0117464	0.00344062	17
-0.2	-0.0131581	0.00773165	17			-0.2	-0.000458033	0.00512352	17
-0.15	-0.0129706	0.00728057	17			-0.15	-0.00782093	0.0040947	17
-0.0999999	-0.00931638	0.00690656	17			-0.0999999	-0.0039667	0.0054638	17
-0.05	-0.01333	0.0059973	17			-0.05	-0.00576192	0.00368555	17
0	-0.0147	0.00782829	17			0	0.0126727	0.010988	17
0.05	0.0852176	0.0153929	17			0.05	0.0758117	0.0165016	17
0.0999999	0.248065	0.0415383	17			0.0999999	0.119473	0.0239729	17
0.15	0.338687	0.0572398	17			0.15	0.137878	0.0245197	17
0.2	0.402246	0.0716915	17			0.2	0.148452	0.0245606	17
0.25	0.417517	0.0860547	17			0.25	0.138316	0.0215042	17
0.3	0.370391	0.0817575	17			0.3	0.103993	0.0191126	17
0.35	0.348191	0.0790159	17			0.35	0.0886655	0.0173773	17
0.4	0.322985	0.0761123	17			0.4	0.0762065	0.0174074	17
0.45	0.297184	0.0708451	17			0.45	0.0668263	0.0141465	17
0.5	0.281693	0.0714737	17			0.5	0.068392	0.0140431	17
0.55	0.257612	0.0679854	17			0.55	0.0490847	0.0123255	17
0.6	0.245194	0.0631763	17			0.6	0.0513971	0.00946295	17
0.65	0.235417	0.0612669	17			0.65	0.041054	0.0116155	17
0.7	0.222033	0.0601236	17			0.7	0.0427289	0.0108905	17
0.75	0.204393	0.0557928	17			0.75	0.0254452	0.00997248	17
0.8	0.189551	0.0542209	17			0.8	0.0283351	0.0108612	17
0.85	0.179204	0.0516506	17			0.85	0.0231322	0.0103094	17
0.9	0.170518	0.0482333	17			0.9	0.0152934	0.00790766	17
0.95	0.167599	0.0458522	17			0.95	0.0240526	0.00904912	17
1	0.144269	0.0426207	17			1	0.0133445	0.00857438	17
1.05	0.140158	0.040235	17			1.05	0.018665	0.00766252	17
1.1	0.131317	0.0417419	17			1.1	0.0129175	0.00961911	17
1.15	0.122198	0.0357734	17			1.15	0.0103987	0.00765603	17
1.2	0.119554	0.0352657	17			1.2	0.00760877	0.00795624	17
1.25	0.105651	0.0351463	17			1.25	0.00728207	0.00775697	17
1.3	0.0985973	0.0327176	17			1.3	0.0108353	0.00618534	17
1.35	0.0957736	0.0321593	17			1.35	0.00152119	0.0082111	17
1.4	0.0874051	0.0298547	17			1.4	0.0046958	0.00730528	17
1.45	0.0786433	0.0279778	17			1.45	0.00598012	0.00744426	17
1.5	0.0876103	0.0295618	17			1.5	0.00066297	0.00803573	17
1.55	0.0695159	0.0254763	17			1.55	-0.00548527	0.00800051	17
1.6	0.0702954	0.0272057	17			1.6	0.000250467	0.00779216	17
1.65	0.0712132	0.024394	17			1.65	0.00813591	0.00885716	17
1.7	0.065152	0.0236865	17			1.7	-0.00300138	0.00733733	17
1.75	0.0613251	0.0222598	17			1.75	-0.0101413	0.00527484	17
1.8	0.0632429	0.0239816	17			1.8	-0.00139546	0.00754168	17
1.85	0.0501989	0.0229248	17			1.85	-0.0100341	0.00701567	17
1.9	0.0452214	0.0206497	17			1.9	-0.0120253	0.00729226	17
1.95	0.0411058	0.0214289	17			1.95	-0.0104801	0.00685937	17
2	0.0412773	0.0204352	17			2	-0.00675616	0.00825978	17
2.05	0.0279915	0.0186303	17			2.05	-0.00730865	0.00634154	17
2.1	0.0273493	0.0159349	17			2.1	-0.0137825	0.00739995	17
2.15	0.0223919	0.016768	17			2.15	-0.00732455	0.0070679	17
2.2	0.0279274	0.0189227	17			2.2	-0.0152958	0.00691113	17
2.25	0.0269273	0.018208	17			2.25	-0.0146874	0.00660983	17
2.3	0.0202719	0.0181773	17			2.3	-0.0100396	0.00617504	17
2.35	0.0195394	0.016429	17			2.35	-0.0118167	0.00646431	17
2.4	0.0221513	0.0158214	17			2.4	-0.0150419	0.00615723	17
2.45	0.0125991	0.0164231	17			2.45	-0.0157266	0.00775838	17
2.5	0.0208927	0.0166488	17			2.5	-0.0220943	0.00689478	17
2.55	0.0135221	0.0140834	17			2.55	-0.0216696	0.00884925	17
2.6	0.0206202	0.0163766	17			2.6	-0.0116675	0.00705365	17
2.65	0.0065397	0.0160396	17			2.65	-0.014521	0.00793737	17
2.7	0.0130318	0.0160122	17			2.7	-0.0183787	0.00737646	17
2.75	0.00864053	0.0161362	17			2.75	-0.0176155	0.00955969	17
2.8	0.0143986	0.0161435	17			2.8	-0.0173873	0.00656697	17
2.85	0.00988477	0.0160682	17			2.85	-0.0107509	0.00846863	17
2.9	0.00818413	0.0145241	17			2.9	-0.015892	0.00785668	17
2.95	0.00159088	0.0136348	17			2.95	-0.0240603	0.00796042	17
3	0.00157003	0.0168372	17			3	-0.0228298	0.00942478	17
3.05	0.00894527	0.0158751	17			3.05	-0.0212655	0.00868235	17
3.1	0.00202486	0.0166097	17			3.1	-0.0075345	0.00833823	17
3.15	0.00838874	0.0154643	17			3.15	-0.0159221	0.00846861	17
3.2	-0.00737537	0.0162652	17			3.2	-0.0222407	0.00734251	17
3.25	-0.0107347	0.0135653	17			3.25	-0.0206574	0.00855469	17
3.3	0.00127548	0.015301	17			3.3	-0.0184545	0.00853688	17
3.35	-0.00939545	0.0159078	17			3.35	-0.0200846	0.0102873	17
3.4	-0.0134814	0.0123293	17			3.4	-0.021023	0.0099394	17
3.45	-0.00834828	0.0149452	17			3.45	-0.0185597	0.00770776	17
3.5	-0.00899458	0.0139152	17			3.5	-0.0198821	0.00675587	17
3.55	-0.010104	0.0140379	17			3.55	-0.023715	0.00932973	17
3.6	-0.0136999	0.0137458	17			3.6	-0.0193429	0.00887065	17
3.65	-0.0208584	0.0109494	17			3.65	-0.0273745	0.0114435	17
3.7	-0.0130796	0.0128863	17			3.7	-0.0281677	0.00929059	17
3.75	-0.0309775	0.015117	17			3.75	-0.023756	0.0104595	17
3.8	-0.0251551	0.0112768	17			3.8	-0.0279993	0.00870552	17
3.85	-0.0237377	0.0116878	17			3.85	-0.0206343	0.0102409	17
3.9	-0.0254002	0.0135018	17			3.9	-0.0245867	0.00979804	17
3.95	-0.0191366	0.0144199	17			3.95	-0.0279409	0.00935421	17
4	-0.0230014	0.0126723	17			4	-0.0239562	0.00883534	17
4.05	-0.020213	0.0140885	17			4.05	-0.01829	0.00717512	17
4.1	-0.0278885	0.012489	17			4.1	-0.0289431	0.0103009	17
4.15	-0.0229277	0.012933	17			4.15	-0.0210609	0.00754827	17
4.2	-0.0260354	0.0136057	17			4.2	-0.0305639	0.0111254	17
4.25	-0.0125443	0.0161198	17			4.25	-0.028137	0.00997316	17
4.3	-0.0281373	0.0139343	17			4.3	-0.0197048	0.00870256	17
4.35	-0.0330124	0.0123048	17			4.35	-0.0293792	0.00935163	17
4.4	-0.0390735	0.0120349	17			4.4	-0.0221024	0.00912759	17
4.45	-0.0326377	0.0146845	17			4.45	-0.0288401	0.0103378	17
4.5	-0.0351585	0.0137658	17			4.5	-0.0231179	0.0104784	17
4.55	-0.0221237	0.0170349	17			4.55	-0.0301833	0.00951774	17
4.6	-0.0400399	0.0148327	17			4.6	-0.0242481	0.01127	17
4.65	-0.0366193	0.0148336	17			4.65	-0.0267501	0.0080994	17
4.7	-0.0374092	0.015692	17			4.7	-0.0148162	0.00878983	17
4.75	-0.0397184	0.0151373	17			4.75	-0.0186649	0.00845022	17
4.8	-0.0400565	0.0169143	17			4.8	-0.034861	0.0102723	17
4.85	-0.038471	0.0159252	17			4.85	-0.032786	0.00918478	17
4.9	-0.0291557	0.0141413	17			4.9	-0.0298859	0.0137	17
4.95	-0.030336	0.0159625	17			4.95	-0.0275372	0.00893058	17
5	-0.0364577	0.0153323	17			5	-0.030302	0.0100874	17
	-0.0308611	0.0175273	9

## Sheet: Figure 2-figure sup 1Di
Figure 2-figure supplement 1D'
MAX GCaMP6s presynaptic responses 0.2s stim					0.2s push DMSO vs TRO 10uM dF/F cell avg dot plot 190806
DMSO	TRO 19622 10 μM
0.2837	0.1242			Column B	TRO 19622 10 μM
0.1934	0.08313			vs.	vs.
0.08823	0.1027			Column A	DMSO
0.08951	-0.00739
0.0373	0.1446			Wilcoxon matched-pairs signed rank test
0.1887	0.2695			P value	0.0005
0.2063	0.02353			Exact or approximate P value?	Exact
0.2444	0.04166			P value summary	***
0.8821	0.1826			Significantly different (P < 0.05)?	Yes
0.5584	0.2015			One- or two-tailed P value?	Two-tailed
0.1145	0.06503			Sum of positive, negative ranks	9.000 , -144.0
0.8385	0.135			Sum of signed ranks (W)	-135
0.6174	0.3975			Number of pairs	17
0.5893	0.1398			Number of ties (ignored)	0
0.9178	0.159
0.5847	0.2813			Median of differences
0.3133	0.1293			Median	-0.184
				How effective was the pairing?
				rs (Spearman)	0.5196
				P value (one tailed)	0.0173
				P value summary	*
				Was the pairing significantly effective?	Yes

## Sheet: Figure 2-figure sup 1E
Figure 2-figure supplement 1D																		Figure 2-figure supplement 1E
AVG GCaMP6s presynaptic responses 0.2s stim																		AVG GCaMP6s presynaptic responses 10s stim
																		Pre-treatment						TRO 19622 10μM
																		Time (sec)	Mean	SEM	n			Time (sec)	Mean	SEM	n
																		-1.95	0.00443404	0.00867399	9			-1.95	0.00289573	0.00798094	9
																		-1.9	0.00626363	0.0101027	9			-1.9	0.00359914	0.00887731	9
																		-1.85	0.000593048	0.00868521	9			-1.85	0.0141993	0.0101602	9
																		-1.8	-0.00256189	0.00569774	9			-1.8	0.00295904	0.0150142	9
																		-1.75	0.00866782	0.00568163	9			-1.75	0.0134341	0.0092997	9
																		-1.7	0.00562738	0.0082053	9			-1.7	0.0034118	0.00946897	9
																		-1.65	0.000471591	0.00808305	9			-1.65	-0.0132437	0.00757707	9
																		-1.6	0.000842608	0.00808417	9			-1.6	-0.00784088	0.0066207	9
																		-1.55	0.000139148	0.0055607	9			-1.55	-0.00358361	0.00712339	9
																		-1.5	0.0140446	0.00494966	9			-1.5	-0.0058481	0.0078768	9
																		-1.45	0.0038133	0.00638704	9			-1.45	0.00647691	0.00937651	9
																		-1.4	0.0141192	0.00795523	9			-1.4	0.000441538	0.00907815	9
																		-1.35	0.0034198	0.00710851	9			-1.35	0.0048486	0.00765592	9
																		-1.3	0.0187306	0.00539022	9			-1.3	-0.00481431	0.00701581	9
																		-1.25	0.0110298	0.00409704	9			-1.25	-0.0024238	0.00453188	9
																		-1.2	0.00483093	0.00467052	9			-1.2	-0.00147736	0.00909675	9
																		-1.15	-0.00670683	0.00945794	9			-1.15	-0.00252337	0.00853663	9
																		-1.1	0.00703321	0.002808	9			-1.1	-0.0089568	0.00897979	9
																		-1.05	0.0101858	0.0053995	9			-1.05	0.00439388	0.00403591	9
																		-1	-0.00138721	0.00640362	9			-1	0.00371759	0.00699044	9
																		-0.95	-0.0081154	0.00603388	9			-0.95	-0.00515773	0.00389696	9
																		-0.9	0.000854647	0.0101613	9			-0.9	-0.00683367	0.00729291	9
																		-0.85	-0.00788984	0.0060856	9			-0.85	0.00934595	0.0066184	9
																		-0.8	0.000260785	0.00653976	9			-0.8	0.00646225	0.00985452	9
																		-0.75	-0.00699508	0.00459727	9			-0.75	-0.00100862	0.00387325	9
																		-0.7	-0.00368499	0.00723913	9			-0.7	-0.0107046	0.00766367	9
																		-0.65	-0.0107743	0.00660614	9			-0.65	-0.00801644	0.00805653	9
																		-0.6	0.00300563	0.00402427	9			-0.6	0.000842176	0.00557528	9
																		-0.55	0.000122621	0.00671739	9			-0.55	0.0178892	0.00855853	9
																		-0.5	-0.00869251	0.00784132	9			-0.5	-0.00303389	0.00567894	9
																		-0.45	-0.00600307	0.00472679	9			-0.45	-0.0141927	0.00957409	9
																		-0.4	-0.00431269	0.00663309	9			-0.4	-0.00900328	0.00604542	9
																		-0.35	-0.00491214	0.00826263	9			-0.35	0.00978824	0.00892918	9
																		-0.3	-0.013298	0.00596223	9			-0.3	-0.013412	0.00404944	9
																		-0.25	-0.00483272	0.00722428	9			-0.25	-0.00364976	0.00580323	9
																		-0.2	-9.2164e-05	0.006884	9			-0.2	0.0178698	0.0104277	9
																		-0.15	-0.00584397	0.00733016	9			-0.15	0.000338229	0.00698527	9
																		-0.0999999	-0.0104761	0.00527557	9			-0.0999999	-0.00422163	0.00953179	9
																		-0.05	-0.00938764	0.00566772	9			-0.05	-0.0174696	0.00970932	9
																		0	-0.0025236	0.00619167	9			0	0.0245024	0.0157158	9
																		0.05	0.0163268	0.00989626	9			0.05	0.0740766	0.0450983	9
																		0.0999999	0.0407735	0.0136598	9			0.0999999	0.115699	0.0581749	9
																		0.15	0.042297	0.0196524	9			0.15	0.151702	0.0592309	9
																		0.2	0.0582027	0.0231352	9			0.2	0.175291	0.0720538	9
																		0.25	0.0687828	0.0370667	9			0.25	0.18575	0.076837	9
																		0.3	0.0782852	0.0373478	9			0.3	0.214938	0.0784058	9
																		0.35	0.0725452	0.0427231	9			0.35	0.213402	0.0859891	9
																		0.4	0.090345	0.0461178	9			0.4	0.243779	0.0899572	9
																		0.45	0.0924516	0.0562564	9			0.45	0.252271	0.0932893	9
																		0.5	0.0980038	0.0579881	9			0.5	0.239882	0.098476	9
																		0.55	0.100325	0.0628357	9			0.55	0.263208	0.0975852	9
																		0.6	0.118547	0.0677219	9			0.6	0.263083	0.105766	9
																		0.65	0.126363	0.0689315	9			0.65	0.26247	0.104608	9
																		0.7	0.130217	0.0673656	9			0.7	0.263063	0.107339	9
																		0.75	0.136455	0.0787071	9			0.75	0.261532	0.101451	9
																		0.8	0.149488	0.0787655	9			0.8	0.270989	0.102463	9
																		0.85	0.153982	0.0802083	9			0.85	0.278441	0.105578	9
																		0.9	0.165611	0.0823034	9			0.9	0.285044	0.102142	9
																		0.95	0.179068	0.0870214	9			0.95	0.280745	0.111378	9
																		1	0.189423	0.0897131	9			1	0.281324	0.109756	9
																		1.05	0.199039	0.0953092	9			1.05	0.284845	0.108502	9
																		1.1	0.20634	0.09966	9			1.1	0.302289	0.114264	9
																		1.15	0.219208	0.102071	9			1.15	0.284637	0.109753	9
																		1.2	0.239519	0.102552	9			1.2	0.288348	0.110577	9
																		1.25	0.240595	0.101609	9			1.25	0.283578	0.107447	9
																		1.3	0.247824	0.10621	9			1.3	0.288088	0.108273	9
																		1.35	0.258022	0.106459	9			1.35	0.277041	0.115283	9
																		1.4	0.263566	0.105252	9			1.4	0.284325	0.109273	9
																		1.45	0.277819	0.105297	9			1.45	0.283151	0.118282	9
																		1.5	0.283501	0.106648	9			1.5	0.287322	0.112543	9
																		1.55	0.283909	0.108165	9			1.55	0.270702	0.113633	9
																		1.6	0.303023	0.11003	9			1.6	0.291918	0.113155	9
																		1.65	0.311384	0.110423	9			1.65	0.315847	0.107311	9
																		1.7	0.31692	0.111192	9			1.7	0.295142	0.113612	9
																		1.75	0.314365	0.113083	9			1.75	0.303795	0.107728	9
																		1.8	0.327601	0.108969	9			1.8	0.312025	0.112643	9
																		1.85	0.346388	0.10874	9			1.85	0.309444	0.114233	9
																		1.9	0.362887	0.111203	9			1.9	0.292193	0.1152	9
																		1.95	0.369822	0.114124	9			1.95	0.306632	0.114869	9
																		2	0.373645	0.115281	9			2	0.303444	0.115772	9
																		2.05	0.364765	0.118933	9			2.05	0.294147	0.111611	9
																		2.1	0.383919	0.11598	9			2.1	0.30021	0.117148	9
																		2.15	0.384228	0.118688	9			2.15	0.292333	0.112396	9
																		2.2	0.397655	0.115674	9			2.2	0.311701	0.119077	9
																		2.25	0.394691	0.119429	9			2.25	0.293023	0.109897	9
																		2.3	0.408625	0.119587	9			2.3	0.308925	0.109812	9
																		2.35	0.421467	0.11795	9			2.35	0.314894	0.112192	9
																		2.4	0.425806	0.119139	9			2.4	0.312778	0.114067	9
																		2.45	0.430214	0.119124	9			2.45	0.292754	0.116721	9
																		2.5	0.434645	0.11962	9			2.5	0.295183	0.108214	9
																		2.55	0.437424	0.119142	9			2.55	0.305968	0.116338	9
																		2.6	0.449768	0.11915	9			2.6	0.303952	0.112936	9
																		2.65	0.446793	0.117837	9			2.65	0.31803	0.11289	9
																		2.7	0.459084	0.117898	9			2.7	0.300704	0.114623	9
																		2.75	0.466501	0.118106	9			2.75	0.312433	0.112554	9
																		2.8	0.472914	0.118279	9			2.8	0.292615	0.111496	9
																		2.85	0.468573	0.118226	9			2.85	0.318111	0.111528	9
																		2.9	0.478497	0.117294	9			2.9	0.305094	0.113655	9
																		2.95	0.480836	0.118463	9			2.95	0.314121	0.112905	9
																		3	0.498231	0.114748	9			3	0.306916	0.114963	9
																		3.05	0.498412	0.119145	9			3.05	0.320817	0.106602	9
																		3.1	0.502901	0.114523	9			3.1	0.315728	0.115092	9
																		3.15	0.49513	0.119208	9			3.15	0.30771	0.113054	9
																		3.2	0.505227	0.116609	9			3.2	0.301685	0.110776	9
																		3.25	0.500346	0.118821	9			3.25	0.310184	0.111318	9
																		3.3	0.512232	0.118563	9			3.3	0.312595	0.115612	9
																		3.35	0.514539	0.118965	9			3.35	0.314179	0.117847	9
																		3.4	0.528122	0.11645	9			3.4	0.322454	0.11637	9
																		3.45	0.528455	0.122376	9			3.45	0.3171	0.11503	9
																		3.5	0.517246	0.118387	9			3.5	0.333901	0.114293	9
																		3.55	0.528193	0.118564	9			3.55	0.318002	0.111108	9
																		3.6	0.54028	0.116808	9			3.6	0.317229	0.108965	9
																		3.65	0.531684	0.119799	9			3.65	0.32913	0.112872	9
																		3.7	0.529022	0.121054	9			3.7	0.3114	0.107033	9
																		3.75	0.542735	0.119138	9			3.75	0.326112	0.110027	9
																		3.8	0.536521	0.1236	9			3.8	0.331778	0.111574	9
																		3.85	0.545378	0.122839	9			3.85	0.32053	0.11054	9
																		3.9	0.544567	0.116902	9			3.9	0.318667	0.108279	9
																		3.95	0.546829	0.119415	9			3.95	0.320431	0.118096	9
																		4	0.548402	0.119124	9			4	0.312792	0.111186	9
																		4.05	0.547767	0.117438	9			4.05	0.326357	0.109301	9
																		4.1	0.554355	0.116187	9			4.1	0.322093	0.116711	9
																		4.15	0.548544	0.117921	9			4.15	0.314717	0.113317	9
																		4.2	0.560684	0.123497	9			4.2	0.325773	0.115095	9
																		4.25	0.554662	0.120501	9			4.25	0.322584	0.112806	9
																		4.3	0.564993	0.116068	9			4.3	0.32286	0.113746	9
																		4.35	0.563225	0.11831	9			4.35	0.319879	0.111513	9
																		4.4	0.572518	0.120903	9			4.4	0.325847	0.11104	9
																		4.45	0.566062	0.119292	9			4.45	0.310621	0.114646	9
																		4.5	0.577869	0.120871	9			4.5	0.323743	0.110276	9
																		4.55	0.569328	0.119448	9			4.55	0.314447	0.115708	9
																		4.6	0.582117	0.122352	9			4.6	0.324582	0.110483	9
																		4.65	0.575807	0.119616	9			4.65	0.318841	0.117068	9
																		4.7	0.578192	0.120871	9			4.7	0.31752	0.114874	9
																		4.75	0.574905	0.12105	9			4.75	0.324461	0.116686	9
																		4.8	0.583082	0.116444	9			4.8	0.330428	0.118118	9
																		4.85	0.58391	0.118287	9			4.85	0.309272	0.115293	9
																		4.9	0.592307	0.116199	9			4.9	0.322627	0.117989	9
																		4.95	0.590956	0.116953	9			4.95	0.310969	0.113843	9
																		5	0.597445	0.123377	9			5	0.325134	0.118784	9
																		5.05	0.595945	0.120628	9			5.05	0.329761	0.111169	9
																		5.1	0.603439	0.119612	9			5.1	0.317175	0.11069	9
																		5.15	0.590422	0.121471	9			5.15	0.308953	0.116277	9
																		5.2	0.594002	0.118693	9			5.2	0.317292	0.112783	9
																		5.25	0.594811	0.118073	9			5.25	0.300099	0.117129	9
																		5.3	0.60246	0.120316	9			5.3	0.303434	0.111199	9
																		5.35	0.602261	0.123012	9			5.35	0.303104	0.120388	9
																		5.4	0.609113	0.121967	9			5.4	0.304499	0.116709	9
																		5.45	0.6036	0.120468	9			5.45	0.304737	0.11215	9
																		5.5	0.618394	0.12188	9			5.5	0.298059	0.111675	9
																		5.55	0.618703	0.11328	9			5.55	0.304442	0.11381	9
																		5.6	0.622739	0.119566	9			5.6	0.310542	0.113094	9
																		5.65	0.603098	0.117865	9			5.65	0.293319	0.112115	9
																		5.7	0.6147	0.115561	9			5.7	0.309169	0.109618	9
																		5.75	0.609571	0.120959	9			5.75	0.294522	0.116092	9
																		5.8	0.623275	0.118471	9			5.8	0.294883	0.115087	9
																		5.85	0.625689	0.119994	9			5.85	0.290629	0.118499	9
																		5.9	0.607571	0.119831	9			5.9	0.29858	0.110411	9
																		5.95	0.61092	0.118793	9			5.95	0.296041	0.116017	9
																		6	0.618286	0.117506	9			6	0.294454	0.113113	9
																		6.05	0.61775	0.11907	9			6.05	0.287206	0.107944	9
																		6.1	0.616716	0.12053	9			6.1	0.292495	0.117462	9
																		6.15	0.616959	0.121067	9			6.15	0.288072	0.113103	9
																		6.2	0.623315	0.12482	9			6.2	0.291086	0.113629	9
																		6.25	0.613238	0.119348	9			6.25	0.277125	0.113873	9
																		6.3	0.618093	0.121529	9			6.3	0.281132	0.120047	9
																		6.35	0.611568	0.119789	9			6.35	0.263715	0.113036	9
																		6.4	0.622	0.117179	9			6.4	0.284834	0.110023	9
																		6.45	0.614881	0.120955	9			6.45	0.279473	0.11655	9
																		6.5	0.624603	0.121336	9			6.5	0.278243	0.110718	9
																		6.55	0.623987	0.122403	9			6.55	0.286013	0.117019	9
																		6.6	0.625233	0.12489	9			6.6	0.276126	0.117895	9
																		6.65	0.618332	0.116904	9			6.65	0.272023	0.110367	9
																		6.7	0.619323	0.115346	9			6.7	0.284739	0.114086	9
																		6.75	0.62186	0.117263	9			6.75	0.259522	0.114838	9
																		6.8	0.634133	0.118206	9			6.8	0.270867	0.117363	9
																		6.85	0.612727	0.117722	9			6.85	0.281581	0.117805	9
																		6.9	0.621226	0.120629	9			6.9	0.267976	0.115462	9
																		6.95	0.620553	0.123706	9			6.95	0.267949	0.118986	9
																		7	0.616628	0.120439	9			7	0.272573	0.118031	9
																		7.05	0.61503	0.116369	9			7.05	0.263547	0.112957	9
																		7.1	0.620947	0.119026	9			7.1	0.261947	0.116606	9
																		7.15	0.618347	0.118899	9			7.15	0.253248	0.118968	9
																		7.2	0.626931	0.115487	9			7.2	0.267744	0.118712	9
																		7.25	0.624426	0.115967	9			7.25	0.241861	0.119955	9
																		7.3	0.617983	0.120801	9			7.3	0.260486	0.11545	9
																		7.35	0.622874	0.116302	9			7.35	0.262478	0.114839	9
																		7.4	0.627867	0.119377	9			7.4	0.259066	0.119209	9
																		7.45	0.628658	0.118364	9			7.45	0.234172	0.123959	9
																		7.5	0.617034	0.123418	9			7.5	0.260931	0.115536	9
																		7.55	0.623791	0.123095	9			7.55	0.243126	0.114315	9
																		7.6	0.620709	0.120934	9			7.6	0.258159	0.111206	9
																		7.65	0.631709	0.118903	9			7.65	0.256682	0.117815	9
																		7.7	0.629475	0.115098	9			7.7	0.24663	0.11659	9
																		7.75	0.623692	0.115505	9			7.75	0.239222	0.118325	9
																		7.8	0.622886	0.114039	9			7.8	0.240345	0.116997	9
																		7.85	0.617432	0.117203	9			7.85	0.249317	0.114498	9
																		7.9	0.611626	0.119924	9			7.9	0.238651	0.116476	9
																		7.95	0.611173	0.11538	9			7.95	0.237114	0.114951	9
																		8	0.606867	0.113631	9			8	0.242623	0.117453	9
																		8.05	0.615457	0.115313	9			8.05	0.246037	0.118199	9
																		8.1	0.61214	0.113117	9			8.1	0.20452	0.125019	9
																		8.15	0.625961	0.119829	9			8.15	0.232194	0.118551	9
																		8.2	0.615564	0.113689	9			8.2	0.233095	0.113517	9
																		8.25	0.606114	0.118285	9			8.25	0.225143	0.11798	9
																		8.3	0.609815	0.119767	9			8.3	0.22625	0.118788	9
																		8.35	0.595011	0.116804	9			8.35	0.239559	0.114201	9
																		8.4	0.623455	0.117916	9			8.4	0.228884	0.112099	9
																		8.45	0.601914	0.114929	9			8.45	0.234512	0.119308	9
																		8.5	0.603981	0.113531	9			8.5	0.247402	0.121532	9
																		8.55	0.603983	0.114828	9			8.55	0.230053	0.116805	9
																		8.6	0.613544	0.113657	9			8.6	0.230842	0.117778	9
																		8.65	0.612163	0.11634	9			8.65	0.2281	0.12124	9
																		8.7	0.604406	0.121894	9			8.7	0.242267	0.111745	9
																		8.75	0.608684	0.12011	9			8.75	0.227293	0.11402	9
																		8.8	0.607634	0.117753	9			8.8	0.224982	0.117761	9
																		8.85	0.616289	0.113181	9			8.85	0.208851	0.114224	9
																		8.9	0.601873	0.111661	9			8.9	0.215211	0.112489	9
																		8.95	0.603243	0.11845	9			8.95	0.219508	0.119675	9
																		9	0.608631	0.115142	9			9	0.220225	0.118012	9
																		9.05	0.608636	0.108202	9			9.05	0.202124	0.114118	9
																		9.1	0.605726	0.119346	9			9.1	0.217751	0.116742	9
																		9.15	0.608274	0.11175	9			9.15	0.210205	0.118413	9
																		9.2	0.600436	0.118329	9			9.2	0.20588	0.121514	9
																		9.25	0.592038	0.113105	9			9.25	0.200747	0.117757	9
																		9.3	0.591504	0.117357	9			9.3	0.217873	0.115159	9
																		9.35	0.598413	0.116395	9			9.35	0.200685	0.121073	9
																		9.4	0.585474	0.109502	9			9.4	0.212785	0.111482	9
																		9.45	0.602986	0.111161	9			9.45	0.20966	0.115952	9
																		9.5	0.600819	0.109229	9			9.5	0.211105	0.120866	9
																		9.55	0.594075	0.113516	9			9.55	0.228133	0.12343	9
																		9.6	0.577883	0.115015	9			9.6	0.213357	0.121306	9
																		9.65	0.602072	0.112855	9			9.65	0.202646	0.121357	9
																		9.7	0.590708	0.114474	9			9.7	0.213907	0.122003	9
																		9.75	0.597478	0.117704	9			9.75	0.214706	0.118232	9
																		9.8	0.577154	0.120201	9			9.8	0.203144	0.110432	9
																		9.85	0.578085	0.116734	9			9.85	0.183017	0.111281	9
																		9.9	0.576041	0.117036	9			9.9	0.17205	0.105904	9
																		9.95	0.57276	0.114428	9			9.95	0.145221	0.106474	9
																		10	0.571447	0.112231	9			10	0.159324	0.104564	9
																		10.05	0.547271	0.112722	9			10.05	0.142799	0.0989174	9
																		10.1	0.544619	0.112411	9			10.1	0.12973	0.0956562	9
																		10.15	0.534301	0.108425	9			10.15	0.132342	0.102078	9
																		10.2	0.542486	0.109569	9			10.2	0.108135	0.099373	9
																		10.25	0.535446	0.105286	9			10.25	0.109806	0.0976163	9
																		10.3	0.540933	0.103776	9			10.3	0.0971171	0.0962492	9
																		10.35	0.510721	0.107282	9			10.35	0.102683	0.0994224	9
																		10.4	0.504644	0.10576	9			10.4	0.100381	0.0966277	9
																		10.45	0.506573	0.102474	9			10.45	0.10049	0.092397	9
																		10.5	0.500364	0.108263	9			10.5	0.0941292	0.0978756	9
																		10.55	0.507536	0.100369	9			10.55	0.0877928	0.0992132	9
																		10.6	0.485399	0.100387	9			10.6	0.0991338	0.0933304	9
																		10.65	0.485633	0.098886	9			10.65	0.0641766	0.0901846	9
																		10.7	0.463351	0.0982874	9			10.7	0.0844282	0.0974825	9
																		10.75	0.46677	0.0993393	9			10.75	0.0688437	0.0961355	9
																		10.8	0.461606	0.100072	9			10.8	0.057381	0.0955212	9
																		10.85	0.453901	0.0992894	9			10.85	0.0727985	0.0962158	9
																		10.9	0.463179	0.10236	9			10.9	0.0713239	0.0980049	9
																		10.95	0.467336	0.0953607	9			10.95	0.0600026	0.0944936	9
																		11	0.439676	0.102634	9			11	0.0641437	0.0962667	9
																		11.05	0.449443	0.0964232	9			11.05	0.0457931	0.0929801	9
																		11.1	0.453499	0.0948587	9			11.1	0.0565736	0.0974951	9
																		11.15	0.437368	0.0933289	9			11.15	0.0468167	0.0945405	9
																		11.2	0.437364	0.0964214	9			11.2	0.0376699	0.0944822	9
																		11.25	0.427572	0.0931424	9			11.25	0.0320176	0.100162	9
																		11.3	0.427866	0.0945286	9			11.3	0.0490973	0.0944978	9
																		11.35	0.422044	0.0925985	9			11.35	0.0342199	0.0946256	9
																		11.4	0.407512	0.0928705	9			11.4	0.0433075	0.0974994	9
																		11.45	0.413063	0.0935505	9			11.45	0.035163	0.0922966	9
																		11.5	0.400116	0.0935784	9			11.5	0.0291411	0.0932523	9
																		11.55	0.400636	0.0952469	9			11.55	0.023985	0.093822	9
																		11.6	0.406053	0.0955258	9			11.6	0.0177164	0.0908532	9
																		11.65	0.39671	0.0885498	9			11.65	0.0158564	0.0891111	9
																		11.7	0.39384	0.085559	9			11.7	0.0208415	0.0980677	9
																		11.75	0.393228	0.0895342	9			11.75	0.0101517	0.096587	9
																		11.8	0.381462	0.0899521	9			11.8	0.0233912	0.0976434	9
																		11.85	0.376465	0.0927068	9			11.85	0.00290664	0.0944263	9
																		11.9	0.379899	0.0851726	9			11.9	0.00955231	0.0911368	9
																		11.95	0.377832	0.0879952	9			11.95	0.00506516	0.0899401	9
																		12	0.376146	0.0868704	9			12	-0.00064503	0.0894888	9
																		12.05	0.36374	0.0879504	9			12.05	0.00125079	0.0885495	9
																		12.1	0.381744	0.0869611	9			12.1	-0.00309681	0.0902339	9
																		12.15	0.34964	0.0839023	9			12.15	0.00387364	0.0968938	9
																		12.2	0.356956	0.0852528	9			12.2	-0.00296008	0.0964019	9
																		12.25	0.360388	0.0810226	9			12.25	-0.00940568	0.0918403	9
																		12.3	0.341906	0.0829754	9			12.3	-0.00863304	0.0945331	9
																		12.35	0.345028	0.0828735	9			12.35	-0.0173727	0.090499	9
																		12.4	0.332541	0.0747334	9			12.4	-0.0137221	0.087652	9
																		12.45	0.326942	0.077065	9			12.45	-0.0170193	0.0922606	9
																		12.5	0.32591	0.0745772	9			12.5	-0.00476335	0.0924474	9
																		12.55	0.322621	0.0797486	9			12.55	-0.0075415	0.0958423	9
																		12.6	0.320047	0.0792902	9			12.6	0.000800329	0.0958591	9
																		12.65	0.308222	0.0778024	9			12.65	-0.0113635	0.0910989	9
																		12.7	0.307994	0.0743338	9			12.7	-0.00301971	0.093713	9
																		12.75	0.319774	0.0711566	9			12.75	-0.0107657	0.0952996	9
																		12.8	0.304198	0.0743515	9			12.8	-0.0118313	0.0897584	9
																		12.85	0.314229	0.0704698	9			12.85	-0.0132105	0.0890413	9
																		12.9	0.316916	0.0680536	9			12.9	-0.0222852	0.0881606	9
																		12.95	0.290478	0.0640942	9			12.95	-0.0208068	0.0862811	9
																		13	0.293855	0.0669649	9			13	-0.0302088	0.087916	9
																		13.05	0.281486	0.0689278	9			13.05	-0.0332063	0.0846377	9
																		13.1	0.282908	0.0652996	9			13.1	-0.017407	0.0850914	9
																		13.15	0.263807	0.0655294	9			13.15	-0.0308171	0.0827873	9
																		13.2	0.266113	0.0682708	9			13.2	-0.0334855	0.088841	9
																		13.25	0.278756	0.0637472	9			13.25	-0.031961	0.0858864	9
																		13.3	0.270691	0.0656542	9			13.3	-0.0189068	0.0876147	9
																		13.35	0.261616	0.0633438	9			13.35	-0.0572261	0.0778327	9
																		13.4	0.26258	0.0647839	9			13.4	-0.0404509	0.0843437	9
																		13.45	0.253039	0.0595068	9			13.45	-0.0138793	0.0888981	9
																		13.5	0.258345	0.0578684	9			13.5	-0.0363928	0.0859973	9
																		13.55	0.241736	0.0564304	9			13.55	-0.0394118	0.0812261	9
																		13.6	0.246461	0.0543458	9			13.6	-0.0404804	0.0846489	9
																		13.65	0.246057	0.0519321	9			13.65	-0.0472446	0.0825544	9
																		13.7	0.239834	0.0528224	9			13.7	-0.0357071	0.0812934	9
																		13.75	0.231255	0.0566754	9			13.75	-0.0312083	0.0868652	9
																		13.8	0.232164	0.0532313	9			13.8	-0.0431879	0.078991	9
																		13.85	0.226923	0.0568431	9			13.85	-0.0422131	0.0816833	9
																		13.9	0.209823	0.0553624	9			13.9	-0.0490083	0.0826425	9
																		13.95	0.219043	0.0554676	9			13.95	-0.035829	0.0838209	9
																		14	0.214711	0.0544895	9			14	-0.0517224	0.0823321	9
																		14.05	0.202054	0.0546963	9			14.05	-0.0502196	0.080389	9
																		14.1	0.196811	0.0535345	9			14.1	-0.042879	0.0801223	9
																		14.15	0.20127	0.0489405	9			14.15	-0.0381358	0.0814113	9
																		14.2	0.204307	0.0524398	9			14.2	-0.0418961	0.0820216	9
																		14.25	0.189228	0.0478642	9			14.25	-0.0601573	0.0760047	9
																		14.3	0.189331	0.0473748	9			14.3	-0.0464917	0.0785123	9
																		14.35	0.193312	0.0454368	9			14.35	-0.0470434	0.0818684	9
																		14.4	0.179799	0.0530826	9			14.4	-0.058834	0.0754831	9
																		14.45	0.188392	0.0480497	9			14.45	-0.059636	0.0775904	9
																		14.5	0.178713	0.0420884	9			14.5	-0.0627688	0.0734408	9
																		14.55	0.174316	0.0476298	9			14.55	-0.0486876	0.0753637	9
																		14.6	0.170417	0.0428732	9			14.6	-0.0581554	0.0775974	9
																		14.65	0.161743	0.0381521	9			14.65	-0.0601443	0.0723985	9
																		14.7	0.158579	0.0392505	9			14.7	-0.0650066	0.0747133	9
																		14.75	0.149547	0.0375681	9			14.75	-0.0486582	0.0775177	9
																		14.8	0.147412	0.0361329	9			14.8	-0.0672095	0.0717056	9
																		14.85	0.146641	0.0387083	9			14.85	-0.0678031	0.0728854	9
																		14.9	0.152862	0.0443652	9			14.9	-0.0569069	0.073464	9
																		14.95	0.13525	0.0401032	9			14.95	-0.0530489	0.0700396	9
																		15	0.140679	0.0421396	9			15	-0.051131	0.075713	9
																		15.05	0.147521	0.037287	9			15.05	-0.0614267	0.0756547	9
																		15.1	0.133607	0.0354579	9			15.1	-0.0629156	0.0716935	9
																		15.15	0.129724	0.0384469	9			15.15	-0.0851758	0.0642439	9
																		15.2	0.109037	0.0387136	9			15.2	-0.0693447	0.0737732	9
																		15.25	0.116319	0.0373668	9			15.25	-0.0796243	0.071294	9
																		15.3	0.127112	0.036128	9			15.3	-0.0597948	0.0725915	9
																		15.35	0.115101	0.0363523	9			15.35	-0.0651495	0.0755854	9
																		15.4	0.116071	0.0411217	9			15.4	-0.0688328	0.0659728	9
																		15.45	0.112323	0.0349358	9			15.45	-0.062407	0.0717134	9
																		15.5	0.11927	0.0314824	9			15.5	-0.0686564	0.0695242	9
																		15.55	0.10495	0.0369448	9			15.55	-0.0734285	0.0691656	9
																		15.6	0.0991207	0.0315332	9			15.6	-0.0674767	0.0714312	9
																		15.65	0.104489	0.0294331	9			15.65	-0.0717829	0.0694185	9
																		15.7	0.0968796	0.0302068	9			15.7	-0.0799953	0.0651758	9
																		15.75	0.0912756	0.0372501	9			15.75	-0.0651698	0.0706338	9
																		15.8	0.0979893	0.0285604	9			15.8	-0.073083	0.0685821	9
																		15.85	0.0942303	0.0277962	9			15.85	-0.0680286	0.0696347	9
																		15.9	0.0790642	0.0318976	9			15.9	-0.0685592	0.0678538	9
																		15.95	0.0879612	0.0276139	9			15.95	-0.0805599	0.0677024	9
																		16	0.0943664	0.0323446	9			16	-0.0634474	0.0671876	9
																		16.05	0.0779374	0.0371376	9			16.05	-0.0627444	0.0677652	9
																		16.1	0.0858935	0.0279664	9			16.1	-0.0820654	0.0703283	9
																		16.15	0.071142	0.0255463	9			16.15	-0.074035	0.0666249	9
																		16.2	0.0758728	0.0275779	9			16.2	-0.0729478	0.0637637	9
																		16.25	0.0733304	0.030621	9			16.25	-0.077105	0.0648401	9
																		16.3	0.0533623	0.0258379	9			16.3	-0.0747105	0.0606421	9
																		16.35	0.0699183	0.032125	9			16.35	-0.0732964	0.0645192	9
																		16.4	0.06873	0.0312825	9			16.4	-0.0736054	0.0640921	9
																		16.45	0.0553152	0.0277675	9			16.45	-0.0869444	0.0636262	9
																		16.5	0.0506829	0.025554	9			16.5	-0.0742305	0.0607809	9
																		16.55	0.0548949	0.031195	9			16.55	-0.0749442	0.059913	9
																		16.6	0.0616346	0.030742	9			16.6	-0.0710773	0.0631027	9
																		16.65	0.0635637	0.0265141	9			16.65	-0.073302	0.063671	9
																		16.7	0.0615875	0.0283034	9			16.7	-0.0676942	0.0676175	9
																		16.75	0.0634361	0.0285459	9			16.75	-0.0803406	0.0604296	9
																		16.8	0.0509958	0.0280602	9			16.8	-0.0837773	0.0663237	9
																		16.85	0.0663786	0.0297191	9			16.85	-0.0782403	0.0608368	9
																		16.9	0.0446797	0.0250633	9			16.9	-0.0842089	0.059003	9
																		16.95	0.0432369	0.025904	9			16.95	-0.0828742	0.0556052	9
																		17	0.0482226	0.0247223	9			17	-0.088329	0.0592288	9
																		17.05	0.05132	0.0258254	9			17.05	-0.0841951	0.0592222	9
																		17.1	0.040194	0.0280384	9			17.1	-0.101493	0.0526395	9
																		17.15	0.0532672	0.0239586	9			17.15	-0.0774093	0.0599429	9
																		17.2	0.0326154	0.0216156	9			17.2	-0.0814806	0.0602401	9
																		17.25	0.0456139	0.0217091	9			17.25	-0.0862228	0.0588539	9
																		17.3	0.0438178	0.0248182	9			17.3	-0.084026	0.0595801	9
																		17.35	0.0244441	0.0220947	9			17.35	-0.0991889	0.0562281	9
																		17.4	0.0300774	0.0231758	9			17.4	-0.0738681	0.0600558	9
																		17.45	0.0408243	0.0188902	9			17.45	-0.101879	0.0519313	9
																		17.5	0.0326004	0.0222617	9			17.5	-0.0739874	0.0596285	9
																		17.55	0.0247504	0.0228697	9			17.55	-0.0834371	0.0571371	9
																		17.6	0.0247938	0.0206229	9			17.6	-0.076003	0.0538951	9
																		17.65	0.0240907	0.0261561	9			17.65	-0.0872087	0.0536579	9
																		17.7	0.0275724	0.0210195	9			17.7	-0.0779866	0.0551355	9
																		17.75	0.023947	0.0207601	9			17.75	-0.0885767	0.0519474	9
																		17.8	0.0232741	0.0207582	9			17.8	-0.0754405	0.0599558	9
																		17.85	0.0162473	0.026564	9			17.85	-0.082893	0.0543738	9
																		17.9	0.0179818	0.0229887	9			17.9	-0.0906922	0.0518204	9
																		17.95	0.0246448	0.0250482	9			17.95	-0.0836886	0.0498468	9
																		18	0.00828962	0.0230271	9			18	-0.0929465	0.0523117	9
																		18.05	0.0171647	0.020677	9			18.05	-0.0870484	0.0579327	9
																		18.1	0.0201203	0.0198508	9			18.1	-0.0935934	0.0497632	9
																		18.15	0.014126	0.0224134	9			18.15	-0.0838209	0.0538367	9
																		18.2	0.0125241	0.0239784	9			18.2	-0.0945648	0.0543861	9
																		18.25	0.00234675	0.0224211	9			18.25	-0.10029	0.0522792	9
																		18.3	0.0046548	0.0219043	9			18.3	-0.0854056	0.0587272	9
																		18.35	0.00924052	0.0212294	9			18.35	-0.0973419	0.0480201	9
																		18.4	0.00553333	0.0229964	9			18.4	-0.106565	0.0485228	9
																		18.45	-0.00458513	0.0210206	9			18.45	-0.107161	0.0448187	9
																		18.5	0.0126917	0.0219826	9			18.5	-0.109888	0.0523207	9
																		18.55	0.00011113	0.0193124	9			18.55	-0.0973187	0.0470853	9
																		18.6	0.00213967	0.0192724	9			18.6	-0.10449	0.0508567	9
																		18.65	-0.00689241	0.0242443	9			18.65	-0.10071	0.0431336	9
																		18.7	0.00465424	0.0241987	9			18.7	-0.111318	0.0463715	9
																		18.75	0.0123403	0.0210663	9			18.75	-0.0941047	0.0484935	9
																		18.8	-0.0260839	0.0214974	9			18.8	-0.0950978	0.0470473	9
																		18.85	-0.0274201	0.0194397	9			18.85	-0.0951121	0.0472985	9
																		18.9	0.0346745	0.032798	9			18.9	-0.0940789	0.0472379	9
																		18.95	0.000558716	0.0242175	9			18.95	-0.103575	0.0461141	9
																		19	0.00355508	0.0185421	9			19	-0.102671	0.048672	9
																		19.05	0.000714211	0.0194444	9			19.05	-0.106599	0.0507725	9
																		19.1	-0.000907755	0.0241352	9			19.1	-0.108995	0.0417667	9
																		19.15	-0.00413096	0.0213605	9			19.15	-0.115554	0.0407861	9
																		19.2	-0.0100404	0.0196296	9			19.2	-0.100993	0.0404742	9
																		19.25	-0.00698716	0.0161069	9			19.25	-0.109956	0.0450362	9
																		19.3	-0.000400241	0.0154152	9			19.3	-0.110102	0.04504	9
																		19.35	-0.0173622	0.0213973	9			19.35	-0.124264	0.0387826	9
																		19.4	-0.0072396	0.0171274	9			19.4	-0.10035	0.0475957	9
																		19.45	-0.0137467	0.0188564	9			19.45	-0.096069	0.0444281	9
																		19.5	-0.0172243	0.0179643	9			19.5	-0.105011	0.0474794	9
																		19.55	-0.0265563	0.0226168	9			19.55	-0.104552	0.0418313	9
																		19.6	-0.0148686	0.0209124	9			19.6	-0.105503	0.0399046	9
																		19.65	-0.0194165	0.0185785	9			19.65	-0.115651	0.0413445	9
																		19.7	-0.0310023	0.0217777	9			19.7	-0.108781	0.0430418	9
																		19.75	-0.0126773	0.0224489	9			19.75	-0.112923	0.0367747	9
																		19.8	-0.0223219	0.0212043	9			19.8	-0.103083	0.0423864	9
																		19.85	-0.022624	0.0251294	9			19.85	-0.102929	0.04015	9
																		19.9	-0.0221429	0.0213904	9			19.9	-0.106119	0.0437642	9
																		19.95	-0.0286668	0.0189424	9			19.95	-0.113978	0.0381307	9
																		20	-0.0233892	0.0211615	9			20	-0.108267	0.0417503	9
																		20.05	-0.0262175	0.0205858	9			20.05	-0.110926	0.0393574	9
																		20.1	-0.028511	0.0224521	9			20.1	-0.108758	0.0365355	9
																		20.15	-0.0249318	0.024724	9			20.15	-0.113972	0.0411429	9
																		20.2	-0.0310024	0.0224778	9			20.2	-0.100607	0.038324	9
																		20.25	-0.0365723	0.0206842	9			20.25	-0.101498	0.0357058	9
																		20.3	-0.0235313	0.0172511	9			20.3	-0.117843	0.0350635	9
																		20.35	-0.0233486	0.019097	9			20.35	-0.108492	0.0374602	9
																		20.4	-0.0279715	0.0193556	9			20.4	-0.124433	0.0353014	9
																		20.45	-0.0309863	0.0179424	9			20.45	-0.118529	0.0351034	9
																		20.5	-0.0327191	0.0216852	9			20.5	-0.116678	0.0403775	9
																		20.55	-0.0321104	0.0184072	9			20.55	-0.102441	0.0375625	9
																		20.6	-0.0204767	0.0189439	9			20.6	-0.110896	0.0345763	9
																		20.65	-0.0339731	0.0184857	9			20.65	-0.106604	0.0359129	9
																		20.7	-0.0384036	0.0216255	9			20.7	-0.113456	0.0353437	9
																		20.75	-0.0449141	0.0214651	9			20.75	-0.116024	0.0356978	9
																		20.8	-0.0328882	0.0191295	9			20.8	-0.108558	0.038491	9
																		20.85	-0.0483872	0.0209744	9			20.85	-0.10884	0.0383819	9
																		20.9	-0.0394297	0.0200342	9			20.9	-0.105772	0.039069	9
																		20.95	-0.0396033	0.016173	9			20.95	-0.125366	0.0326033	9
																		21	-0.0446453	0.0186129	9			21	-0.112408	0.0363801	9
																		21.05	-0.0387506	0.023185	9			21.05	-0.12089	0.0347627	9
																		21.1	-0.0498713	0.0232413	9			21.1	-0.130172	0.029855	9
																		21.15	-0.0423387	0.0219072	9			21.15	-0.107987	0.0359919	9
																		21.2	-0.0516989	0.0200125	9			21.2	-0.120327	0.0341967	9
																		21.25	-0.035292	0.0194568	9			21.25	-0.12426	0.0298719	9
																		21.3	-0.0399456	0.0192328	9			21.3	-0.116817	0.0337481	9
																		21.35	-0.0520867	0.0208313	9			21.35	-0.119474	0.0306461	9
																		21.4	-0.0382543	0.0231509	9			21.4	-0.103278	0.0378272	9
																		21.45	-0.0495408	0.0177249	9			21.45	-0.111643	0.0311914	9
																		21.5	-0.0450253	0.0235625	9			21.5	-0.119024	0.0302002	9
																		21.55	-0.0400009	0.0210752	9			21.55	-0.131081	0.0336332	9
																		21.6	-0.0569109	0.0197611	9			21.6	-0.131334	0.0265067	9
																		21.65	-0.0652033	0.0187426	9			21.65	-0.120035	0.0354263	9
																		21.7	-0.0503515	0.0201801	9			21.7	-0.124242	0.0325666	9
																		21.75	-0.0572744	0.020412	9			21.75	-0.122764	0.0318764	9
																		21.8	-0.053456	0.0232474	9			21.8	-0.10966	0.0353214	9
																		21.85	-0.0391629	0.0190266	9			21.85	-0.113267	0.0363711	9
																		21.9	-0.0443084	0.0214193	9			21.9	-0.12227	0.0326847	9
																		21.95	-0.051264	0.0225151	9			21.95	-0.117809	0.0315059	9
																		22	-0.0497515	0.021616	9			22	-0.117657	0.0302979	9
																		22.05	-0.0588425	0.021905	9			22.05	-0.109741	0.0357948	9
																		22.1	-0.053488	0.0211194	9			22.1	-0.111596	0.0359695	9
																		22.15	-0.0397836	0.0214559	9			22.15	-0.10795	0.0319474	9
																		22.2	-0.0444022	0.0193998	9			22.2	-0.125022	0.0319996	9
																		22.25	-0.0460953	0.0191304	9			22.25	-0.116197	0.0343749	9
																		22.3	-0.0446875	0.0208974	9			22.3	-0.118259	0.0325078	9
																		22.35	-0.0476836	0.0213664	9			22.35	-0.12299	0.034603	9
																		22.4	-0.0448055	0.0229026	9			22.4	-0.123736	0.0346507	9
																		22.45	-0.0476013	0.0211036	9			22.45	-0.125965	0.034919	9
																		22.5	-0.0506844	0.021901	9			22.5	-0.111437	0.0391882	9
																		22.55	-0.0510098	0.0191459	9			22.55	-0.11313	0.0362902	9
																		22.6	-0.045188	0.0201951	9			22.6	-0.130586	0.0317457	9
																		22.65	-0.0573128	0.0228271	9			22.65	-0.111881	0.0296004	9
																		22.7	-0.0536425	0.0174275	9			22.7	-0.130401	0.0289612	9
																		22.75	-0.0429144	0.0193681	9			22.75	-0.128351	0.030758	9
																		22.8	-0.0558897	0.019218	9			22.8	-0.120448	0.03394	9
																		22.85	-0.0524627	0.0187776	9			22.85	-0.123808	0.0325585	9
																		22.9	-0.0626758	0.0230256	9			22.9	-0.12958	0.0320865	9
																		22.95	-0.048971	0.0168358	9			22.95	-0.127264	0.0274164	9
																		23	-0.0672322	0.0233034	9			23	-0.11751	0.0319469	9
																		23.05	-0.0568216	0.0197779	9			23.05	-0.118527	0.0315235	9
																		23.1	-0.0679249	0.0236474	9			23.1	-0.123683	0.0336508	9
																		23.15	-0.0600173	0.0224674	9			23.15	-0.128363	0.0300193	9
																		23.2	-0.0581717	0.0229754	9			23.2	-0.125144	0.0356072	9
																		23.25	-0.0642849	0.021224	9			23.25	-0.122088	0.0315513	9
																		23.3	-0.0590029	0.0236858	9			23.3	-0.131196	0.0319014	9
																		23.35	-0.0579001	0.0229248	9			23.35	-0.120461	0.0329363	9
																		23.4	-0.0531483	0.0237479	9			23.4	-0.131955	0.0306161	9
																		23.45	-0.0707037	0.0190241	9			23.45	-0.122683	0.032629	9
																		23.5	-0.0600296	0.024639	9			23.5	-0.121268	0.0298486	9
																		23.55	-0.0697753	0.0226457	9			23.55	-0.13121	0.0336085	9
																		23.6	-0.0646055	0.0189068	9			23.6	-0.134853	0.0302972	9
																		23.65	-0.0688836	0.0241427	9			23.65	-0.125098	0.0329498	9
																		23.7	-0.0631754	0.0234041	9			23.7	-0.129061	0.0308382	9
																		23.75	-0.0706229	0.0217532	9			23.75	-0.125593	0.0314488	9
																		23.8	-0.0514779	0.0236759	9			23.8	-0.131309	0.0312535	9
																		23.85	-0.0746034	0.0224634	9			23.85	-0.128793	0.0327562	9
																		23.9	-0.0735763	0.0279605	9			23.9	-0.120875	0.0315966	9
																		23.95	-0.0766391	0.0232416	9			23.95	-0.110538	0.0322978	9
																		24	-0.0751437	0.0259517	9			24	-0.13905	0.0311395	9
																		24.05	-0.0671296	0.022142	9			24.05	-0.120258	0.0293038	9
																		24.1	-0.0673904	0.0259376	9			24.1	-0.125949	0.0314966	9
																		24.15	-0.0704095	0.0227397	9			24.15	-0.126689	0.0297418	9
																		24.2	-0.0766445	0.0238306	9			24.2	-0.130446	0.0302942	9
																		24.25	-0.0664116	0.0244813	9			24.25	-0.132333	0.0260291	9
																		24.3	-0.0777035	0.0219334	9			24.3	-0.119183	0.0324205	9
																		24.35	-0.074468	0.0223369	9			24.35	-0.123019	0.0322889	9
																		24.4	-0.0706854	0.023489	9			24.4	-0.136173	0.0326595	9
																		24.45	-0.0660347	0.0223036	9			24.45	-0.135753	0.030736	9
																		24.5	-0.0714268	0.021978	9			24.5	-0.131131	0.0281113	9
																		24.55	-0.0823562	0.0204805	9			24.55	-0.128888	0.0283492	9
																		24.6	-0.0687022	0.0248394	9			24.6	-0.130405	0.0282387	9
																		24.65	-0.0743662	0.0220554	9			24.65	-0.138722	0.0293913	9
																		24.7	-0.0800203	0.0194838	9			24.7	-0.142331	0.0317554	9
																		24.75	-0.0763984	0.026113	9			24.75	-0.127551	0.0287528	9
																		24.8	-0.0670165	0.0196744	9			24.8	-0.129266	0.0287953	9
																		24.85	-0.0685648	0.0218583	9			24.85	-0.125309	0.0305874	9
																		24.9	-0.0699068	0.0208862	9			24.9	-0.140487	0.029853	9
																		24.95	-0.0825141	0.0221868	9			24.95	-0.131033	0.0320354	9
																		25	-0.0765359	0.0226995	9			25	-0.136851	0.0293404	9
																		25.05	-0.075428	0.0231242	9			25.05	-0.123593	0.0303987	9
																		25.1	-0.0770659	0.0223067	9			25.1	-0.130922	0.0276355	9
																		25.15	-0.0816045	0.0258916	9			25.15	-0.123024	0.0285279	9
																		25.2	-0.0835526	0.0275062	9			25.2	-0.132841	0.0321816	9
																		25.25	-0.084592	0.0215218	9			25.25	-0.135759	0.029847	9
																		25.3	-0.0750297	0.0224493	9			25.3	-0.149332	0.0254218	9
																		25.35	-0.0777721	0.0262949	9			25.35	-0.133626	0.0300468	9
																		25.4	-0.0688424	0.0219732	9			25.4	-0.134455	0.0280656	9
																		25.45	-0.0852602	0.021808	9			25.45	-0.134263	0.0307041	9
																		25.5	-0.0867649	0.0233596	9			25.5	-0.129047	0.0280408	9
																		25.55	-0.0883131	0.0276728	9			25.55	-0.127037	0.0270638	9
																		25.6	-0.0772819	0.0216725	9			25.6	-0.142065	0.0238339	9
																		25.65	-0.0846143	0.0251003	9			25.65	-0.13769	0.0286937	9
																		25.7	-0.0849808	0.0228884	9			25.7	-0.130503	0.0327275	9
																		25.75	-0.076573	0.0205832	9			25.75	-0.135556	0.0299392	9
																		25.8	-0.091564	0.0215261	9			25.8	-0.146461	0.0282969	9
																		25.85	-0.0734803	0.0279187	9			25.85	-0.132998	0.0298236	9
																		25.9	-0.0790152	0.0256679	9			25.9	-0.143716	0.0329303	9
																		25.95	-0.0766137	0.0265623	9			25.95	-0.129639	0.0297543	9
																		26	-0.0826989	0.0240086	9			26	-0.145399	0.0279549	9
																		26.05	-0.0762769	0.0248447	9			26.05	-0.144139	0.029668	9
																		26.1	-0.0785449	0.0265778	9			26.1	-0.139174	0.0284493	9
																		26.15	-0.0918771	0.0260171	9			26.15	-0.151715	0.0303289	9
																		26.2	-0.069036	0.0241319	9			26.2	-0.138807	0.0270139	9
																		26.25	-0.0807125	0.0218689	9			26.25	-0.142084	0.0285042	9
																		26.3	-0.0857939	0.0258604	9			26.3	-0.140062	0.0283176	9
																		26.35	-0.0788379	0.0213188	9			26.35	-0.145537	0.0312112	9
																		26.4	-0.0755496	0.0184571	9			26.4	-0.157149	0.0244649	9
																		26.45	-0.0796367	0.0266442	9			26.45	-0.142066	0.0270908	9
																		26.5	-0.0886764	0.02817	9			26.5	-0.142481	0.0313697	9
																		26.55	-0.0807965	0.0234209	9			26.55	-0.157386	0.0266338	9
																		26.6	-0.0809681	0.0263922	9			26.6	-0.135398	0.0294681	9
																		26.65	-0.0828813	0.0229023	9			26.65	-0.144481	0.0275015	9
																		26.7	-0.083972	0.0284394	9			26.7	-0.146281	0.0290893	9
																		26.75	-0.0901492	0.0249673	9			26.75	-0.142081	0.0299391	9
																		26.8	-0.0730466	0.0208101	9			26.8	-0.126785	0.0301184	9
																		26.85	-0.0868861	0.0227622	9			26.85	-0.15113	0.0272592	9
																		26.9	-0.0856886	0.0266423	9			26.9	-0.133668	0.0289629	9
																		26.95	-0.071679	0.0217587	9			26.95	-0.145033	0.0320461	9
																		27	-0.0884697	0.0215779	9			27	-0.145851	0.0252278	9

## Sheet: Figure 2-figure sup 1Ei
Figure 2-figure supplement 1E'
MAX GCaMP6s presynaptic responses 10s stim
						10s push DMSO vs TRO 10uM dF/F cell avg dot plot 190806
DMSO	TRO 19622 10 μM
0.4494	0.5273				Column B	TRO 19622 10 μM
0.4996	0.03402				vs.	vs.
0.5618	0.4042				Column A	DMSO
0.1951	0.01734
0.2887	0.106				Wilcoxon matched-pairs signed rank test
1.067	1.028				P value	0.0117
0.9722	0.32				Exact or approximate P value?	Exact
1.186	0.7511				P value summary	*
0.9162	0.4891				Significantly different (P < 0.05)?	Yes
					One- or two-tailed P value?	Two-tailed
					Sum of positive, negative ranks	2.000 , -43.00
					Sum of signed ranks (W)	-41
					Number of pairs	9
					Number of ties (ignored)	0
					Median of differences
					Median	-0.1827
					How effective was the pairing?
					rs (Spearman)	0.7333
					P value (one tailed)	0.0156
					P value summary	*
					Was the pairing significantly effective?	Yes
