# Supplementary material for: Synaptic mitochondria regulate hair-cell synapse size and function
Source: eLife journal article supplement (doi:10.7554/elife.48914), 2019-10-14
Supplement: supp [file elife-48914-supp-v1.zip › elife_poa_e48914_Figure_2_source_data_1.xlsx]

## Sheet: Figure 2B
Figure 2B
peak dF/F	peak dF/F
GCaMP6sCAAX	mitoRGECO					GCaMP6sCAAX	mitoRGECO
0.670536	0.328756				Number of values	136	136
0.319588	0.206668
0.451635	0.201185				Minimum	-0.187	-0.2204
0.0555278	0.0716655				Maximum	1.881	0.5313
0.164408	0.0683608				Range	2.068	0.7517
0.240163	0.069797
0.129159	0.0414158				Mean	0.217	0.02805
0.257387	0.0924208				Std. Deviation	0.3106	0.1303
0.079859	0.0540975				Std. Error of Mean	0.02664	0.01118
0.218491	0.0333162
0.591008	0.198464
0.455285	0.365378					GCaMP6sCAAX vs	mitoRGECO
0.0579669	0.056667				Pearson r
0.144154	0.0989796				r	0.7674
0.0801419	0.118269				95% confidence interval	0.6879 to 0.8287
0.68891	0.13197				R squared	0.5889
0.164801	0.0411214
0.0245723	0.0287547				P value
0.0925233	0.025966				P (two-tailed)	<0.0001
0.217876	0.0170708				P value summary	****
0.453329	0.0988849				Significant? (alpha = 0.05)	Yes
0.1309	0.0871698
0.101444	0.0429898				Number of XY Pairs	136
0.0873348	0.0235743
0.321796	0.121001
0.128304	0.019423				D'Agostino & Pearson test	GCaMP6sCAAX	mitoRGECO
0.22297	0.0353167				K2	91.37	37.66
1.12634	0.250816				P value	<0.0001	<0.0001
0.0732295	0.0314238				Passed normality test (alpha=0.05)?	No	No
0.0410973	0.012332				P value summary	****	****
0.0747011	0.0810003
0.0635388	0.0306842
0.569594	0.165754
0.8863	0.08878
0.2505	-0.009534
0.1443	0.009903
0.8941	0.1478
0.3863	0.01328
0.128	-0.000848
0.2476	0.01873
0.1185	0.01528
1.412	0.4833
0.2835	0.08253
0.1624	0.009036
0.1486	0.05823
0.07678	0.1151
0.07376	0.07694
0.1956	-0.02533
1.097	0.5313
0.2947	0.02725
0.1203	-0.03211
0.113	0.005241
0.1154	0.004826
0.2021	0.03508
0.5397	0.4391
1.125	0.2921
0.2109	-0.04775
0.1795	0.0294
0.1033	0.01399
0.1232	-0.008875
0.1328	0.0379
0.0907521	-0.11217
-0.00414187	-0.20058
0.0749239	-0.14752
0.0592082	-0.12524
1.05098	0.167197
0.127031	0.001887
0.0293061	-0.1172
0.0947741	-0.07419
0.412637	-0.01298
0.108352	-0.04481
0.0735256	0.020773
-0.000119102	-0.03022
0.423574	0.096471
0.435533	0.044579
-0.0152998	-0.15606
-0.125479	-0.17465
0.0734924	0.048903
-0.0285673	-0.11667
-0.068357	-0.15545
-0.050072	-0.12873
-0.0489573	-0.17663
0.0170526	-0.11845
0.330178	-0.06777
0.0819458	0.038634
-0.0218362	-0.0941
-0.054111	-0.03914
0.148523	0.069532
0.547092	0.139922
0.147057	-0.02529
0.119022	0.032985
0.474512	0.052977
0.0214672	-0.00031
0.237041	0.046031
0.0648934	-0.03289
0.112198	0.027954
0.122748	0.086779
0.153172	0.037723
0.051652	0.036101
0.0302741	0.092556
0.119181	0.023316
0.170702	-0.22044
0.0660762	-0.1864
0.0324467	-0.13024
0.949225	0.211378
1.88133	0.447144
0.193923	-0.03436
0.122081	0.016961
0.0355336	-0.1063
0.0945405	-0.1741
0.0652154	0.101592
0.0376088	-0.09427
0.0149956	-0.07908
0.10003	-0.03296
0.0492146	-0.02356
0.0923284	-0.0439
0.421302	0.123372
0.0237092	-0.17096
-0.0237242	-0.1223
0.724049	0.098829
-0.187028	-0.18712
-0.0371355	-0.04156
-0.0347782	-0.09222
0.162539	0.035171
0.308114	0.044303
-0.0262257	-0.16026
-0.0153821	0.010265
0.0521631	0.005928
0.226398	-0.0246
0.224857	0.028537
-0.00612298	0.004637
0.0365751	0.057189
-0.0637577	-0.06314
-0.0531665	-0.07527
0.209871	0.093349
-0.0202951	0.024999

## Sheet: Figure 2B i
Figure 2B'
	Inactive mitoRGECO peak dF/F	Active mitoRGECO peak dF/F
	GCaMP6sCAAX <0.25	>=0.25
	0.328756
	0.206668				Column B	Active
	0.201185				vs.	vs.
		0.0716655			Column A	Inactive
		0.0683608
		0.069797			Mann Whitney test
		0.0414158			P value	<0.0001
	0.0924208				Exact or approximate P value?	Exact
		0.0540975			P value summary	****
		0.0333162			Significantly different (P < 0.05)?	Yes
	0.198464				One- or two-tailed P value?	Two-tailed
	0.365378				Sum of ranks in column C,E	3441 , 5739
		0.056667			Mann-Whitney U	383
		0.0989796
		0.118269			Difference between medians
	0.13197				Median of column C	0.1359, n=32
		0.0411214			Median of column E	0.01027, n=103
		0.0287547			Difference: Actual	-0.1257
		0.025966			Difference: Hodges-Lehmann	-0.1597
		0.0170708
	0.0988849
		0.0871698
		0.0429898
		0.0235743
	0.121001
		0.019423
		0.0353167
	0.250816
		0.0314238
		0.012332
		0.0810003
		0.0306842
	0.165754
	0.08878
	-0.009534
		0.009903
	0.1478
	0.01328
		-0.000848
		0.01873
		0.01528
	0.4833
	0.08253
		0.009036
		0.05823
		0.1151
		0.07694
		-0.02533
	0.5313
	0.02725
		-0.03211
		0.005241
		0.004826
		0.03508
	0.4391
	0.2921
		-0.04775
		0.0294
		0.01399
		-0.008875
		0.0379
		-0.11217
		-0.20058
		-0.14752
		-0.12524
	0.167197
		0.001887
		-0.1172
		-0.07419
	-0.01298
		-0.04481
		0.020773
		-0.03022
	0.096471
	0.044579
		-0.15606
		-0.17465
		0.048903
		-0.11667
		-0.15545
		-0.12873
		-0.17663
		-0.11845
	-0.06777
		0.038634
		-0.0941
		-0.03914
		0.069532
	0.139922
		-0.02529
		0.032985
	0.052977
		-0.00031
		0.046031
		-0.03289
		0.027954
		0.086779
		0.037723
		0.036101
		0.092556
		0.023316
		-0.22044
		-0.1864
	0.211378
	0.447144
		-0.03436
		0.016961
		-0.1063
		-0.1741
		0.101592
		-0.09427
		-0.07908
		-0.03296
		-0.02356
		-0.0439
	0.123372
		-0.17096
		-0.1223
		0.098829
		-0.18712
		-0.04156
		-0.09222
		0.035171
	0.044303
		-0.16026
		0.010265
		0.005928
		-0.0246
		0.028537
		0.004637
		0.057189
		-0.06314
		-0.07527
		0.093349
		0.024999

## Sheet: Figure 2C
Figure 2C
5 dpf 0.2s stim																					#NAME?
pre-10uM Ru360					10uM Ru360																															10uM Ru360
Time (s)	average dF/F	SEM	n		average dF/F	SEM	n
-1.95	0.00461956	0.00665236	33		0.0119311	0.00563947	33
-1.9	0.00937568	0.00585749	33		0.0260068	0.00627532	33
-1.85	0.0130709	0.0058524	33		0.0134117	0.00600989	33
-1.8	0.00222838	0.00647507	33		0.00272602	0.00578307	33
-1.75	0.00640612	0.00609343	33		0.0194873	0.00699921	33
-1.7	0.00598711	0.00498183	33		0.0137577	0.00618725	33
-1.65	0.0041081	0.0044398	33		0.00908423	0.00481627	33
-1.6	0.0063542	0.00426912	33		0.0193009	0.00576892	33
-1.55	0.00309443	0.00449541	33		0.00830127	0.00484785	33
-1.5	-0.000370651	0.00359063	33		0.00863887	0.00584078	33
-1.45	0.00428721	0.00359551	33		0.0192302	0.00790968	33
-1.4	-0.000888443	0.00517182	33		0.0075816	0.00365272	33
-1.35	-0.00514478	0.0038452	33		0.00779299	0.00617348	33
-1.3	-0.00283631	0.00387151	33		0.000625238	0.00439945	33
-1.25	-0.000598757	0.00328158	33		0.00761212	0.00707034	33
-1.2	0.006345	0.00484119	33		-0.00433856	0.00640779	33
-1.15	-2.63261e-05	0.00367369	33		0.0111633	0.00563604	33
-1.1	0.00066215	0.00474932	33		0.00275754	0.00488688	33
-1.05	0.00158423	0.00374437	33		-0.00284565	0.00478871	33
-1	-0.00458113	0.00370697	33		-0.000719892	0.00472569	33
-0.95	0.00283899	0.00375692	33		-0.0202333	0.00670322	33
-0.9	-0.00327958	0.00308979	33		-0.00868524	0.00408917	33
-0.85	-0.00167427	0.00350948	33		-0.00244239	0.00364741	33
-0.8	0.00339222	0.00479578	33		-0.00399319	0.00633915	33
-0.75	-0.00103935	0.00313048	33		-0.0123817	0.00560955	33
-0.7	-0.00533189	0.00506064	33		0.00137663	0.00550973	33
-0.65	-0.00455473	0.00304609	33		-0.00599582	0.00665913	33
-0.6	-0.00764459	0.00396492	33		-0.00289482	0.00442626	33
-0.55	-0.00928358	0.00392205	33		-0.0104684	0.00388396	33
-0.5	-0.00461376	0.00414934	33		-0.0126202	0.00504218	33
-0.45	-0.00701368	0.00439076	33		-0.0160873	0.00565395	33
-0.4	-0.00288342	0.00469773	33		-0.014474	0.00454772	33
-0.35	-0.0107885	0.00415325	33		-0.0100466	0.00502842	33
-0.3	-0.00527941	0.00370297	33		-0.0141587	0.00494119	33
-0.25	-0.000881976	0.0046846	33		-0.0103268	0.00541512	33
-0.2	-0.0119383	0.00508305	33		-0.00913794	0.00577353	33
-0.15	-0.00850304	0.00507355	33		-0.00811514	0.00479614	33
-0.0999999	-0.00845089	0.00422653	33		-0.0169974	0.00467209	33
-0.05	-0.0139438	0.00487149	33		-0.0238518	0.00611092	33
0	0.0471969	0.0107615	33		0.0200294	0.00799499	33
0.05	0.187524	0.0370228	33		0.0913213	0.0208224	33
0.0999999	0.258061	0.0486773	33		0.13397	0.023988	33
0.15	0.29789	0.0562966	33		0.150143	0.0291185	33
0.2	0.305398	0.0595915	33		0.174674	0.028805	33
0.25	0.26639	0.0559737	33		0.144375	0.0275942	33
0.3	0.248261	0.054449	33		0.11764	0.026584	33
0.35	0.218764	0.0486783	33		0.13088	0.0248137	33
0.4	0.207359	0.0501447	33		0.109863	0.0263812	33
0.45	0.182704	0.0459987	33		0.110984	0.0234563	33
0.5	0.172915	0.0447738	33		0.0916823	0.0234355	33
0.55	0.155573	0.044024	33		0.100873	0.0228653	33
0.6	0.143319	0.0419135	33		0.0831875	0.021678	33
0.65	0.138893	0.0386233	33		0.0786692	0.0211736	33
0.7	0.121448	0.0370626	33		0.0718325	0.0201846	33
0.75	0.112635	0.034948	33		0.0584567	0.0203897	33
0.8	0.109239	0.0329661	33		0.0659292	0.0194573	33
0.85	0.10299	0.0315853	33		0.0765476	0.0187343	33
0.9	0.0906749	0.0313616	33		0.0430831	0.018369	33
0.95	0.0897286	0.0299744	33		0.0659214	0.0171762	33
1	0.0756026	0.0273566	33		0.0496599	0.0159504	33
1.05	0.0756592	0.0271105	33		0.0498545	0.0163452	33
1.1	0.0638192	0.025109	33		0.0401392	0.0156407	33
1.15	0.0653983	0.0257246	33		0.0271335	0.0154186	33
1.2	0.0611635	0.0238403	33		0.0477406	0.0146628	33
1.25	0.055371	0.0227675	33		0.0422687	0.0142507	33
1.3	0.048241	0.022431	33		0.0364747	0.0139017	33
1.35	0.0427426	0.0198446	33		0.0289562	0.0135729	33
1.4	0.0426553	0.0178664	33		0.0269556	0.0128905	33
1.45	0.0460992	0.0240287	33		0.039516	0.0138637	33
1.5	0.0409544	0.0193185	33		0.0253931	0.0134846	33
1.55	0.0363988	0.0179468	33		0.0111677	0.0134322	33
1.6	0.0301656	0.0163986	33		0.0233833	0.0120608	33
1.65	0.026557	0.017148	33		0.0211683	0.0128462	33
1.7	0.0337401	0.0173773	33		0.0272317	0.0113568	33
1.75	0.0193611	0.0173157	33		0.0235575	0.01347	33
1.8	0.0210014	0.015811	33		0.0238736	0.01188	33
1.85	0.016317	0.0160007	33		0.0112408	0.0105924	33
1.9	0.0192198	0.0149999	33		0.00638689	0.0114493	33
1.95	0.020852	0.0161363	33		0.0130281	0.0123964	33
2	0.0078185	0.0140537	33		0.00926975	0.0117071	33
2.05	0.0101537	0.0138633	33		0.00873246	0.0103148	33
2.1	0.0128359	0.0144665	33		0.00720348	0.0106469	33
2.15	0.0114446	0.0136779	33		0.00922024	0.00936996	33
2.2	0.0161422	0.013281	33		-0.00614949	0.0109126	33
2.25	0.00719539	0.0145072	33		0.0184574	0.00981125	33
2.3	-0.000933981	0.0131295	33		0.0153372	0.0107278	33
2.35	0.00801659	0.0126095	33		-0.000866938	0.0105579	33
2.4	0.00947855	0.0128056	33		-0.00812109	0.0109027	33
2.45	0.00258671	0.0123524	33		0.0136157	0.00940371	33
2.5	1.31248e-05	0.012561	33		-0.000484897	0.00835976	33
2.55	-0.000818277	0.0125495	33		-0.00432423	0.00854191	33
2.6	0.00423718	0.0120735	33		-0.0188683	0.00992949	33
2.65	-0.00434285	0.0120413	33		0.00426491	0.00857406	33
2.7	-0.00140799	0.0126271	33		-0.00628762	0.00853127	33
2.75	-0.00296982	0.0116237	33		-0.00377612	0.00839719	33
2.8	-0.0104903	0.0113445	33		-0.0015735	0.00905245	33
2.85	-0.00930238	0.0117062	33		-0.0063073	0.00933402	33
2.9	-0.00886677	0.0113517	33		-0.00554507	0.00963973	33
2.95	-0.0184163	0.0122634	33		-0.00725821	0.00836023	33
3	-0.0138951	0.0114124	33		-0.00761555	0.0078283	33
3.05	-0.0182874	0.0114232	33		-0.00582508	0.00763045	33
3.1	-0.0125964	0.00975929	33		-0.00748642	0.00933039	33
3.15	-0.00657144	0.00999683	33		-0.0148729	0.00923813	33
3.2	-0.0103767	0.0116093	33		-0.0126097	0.00902803	33
3.25	-0.00700143	0.0117123	33		-0.0172215	0.008632	33
3.3	-0.0108641	0.0111855	33		-0.0164018	0.00754103	33
3.35	-0.012572	0.0102923	33		-0.00737319	0.00788134	33
3.4	-0.0145948	0.00979114	33		-0.00290629	0.00859062	33
3.45	-0.0145039	0.0107494	33		-0.0130234	0.00936087	33
3.5	-0.0205378	0.00928314	33		-0.0116105	0.00728938	33
3.55	-0.0187006	0.0101067	33		-0.0181989	0.00811708	33
3.6	-0.0208279	0.00950665	33		-0.020336	0.00790806	33
3.65	-0.0151247	0.0125676	33		-0.0189547	0.00927282	33
3.7	-0.0151497	0.00992708	33		-0.0137708	0.0072181	33
3.75	-0.0179345	0.00984848	33		-0.0182966	0.0060756	33
3.8	-0.0174259	0.0104199	33		-0.0100188	0.00700779	33
3.85	-0.0210583	0.00990181	33		-0.0202627	0.00805034	33
3.9	-0.0257986	0.01015	33		-0.0172882	0.00730773	33
3.95	-0.0218378	0.00901707	33		-0.0210519	0.00981309	33
4	-0.0193384	0.00920535	33		-0.0171496	0.00739509	33
4.05	-0.0234266	0.00958922	33		-0.0174967	0.00782418	33
4.1	-0.0294592	0.00871505	33		-0.0179164	0.00883659	33
4.15	-0.0280423	0.0111316	33		-0.024261	0.00813482	33
4.2	-0.0214304	0.0103199	33		-0.0141229	0.00765021	33
4.25	-0.0218593	0.0101088	33		-0.0190548	0.00861892	33
4.3	-0.0235719	0.00943926	33		-0.0165354	0.00760479	33
4.35	-0.0286499	0.00955671	33		-0.0196908	0.0096631	33
4.4	-0.0247245	0.00987684	33		-0.0206429	0.00931895	33
4.45	-0.0216895	0.0101783	33		-0.0296262	0.00821734	33
4.5	-0.0236539	0.00896148	33		-0.0153809	0.00861154	33
4.55	-0.0307116	0.0101424	33		-0.0255384	0.00766875	33
4.6	-0.0273211	0.010428	33		-0.0215037	0.00682499	33
4.65	-0.0302181	0.010176	33		-0.0264917	0.00967458	33
4.7	-0.0243106	0.0109819	33		-0.0228534	0.0095976	33
4.75	-0.0312605	0.0109013	33		-0.0212621	0.00750341	33
4.8	-0.0376928	0.01125	33		-0.0323636	0.00941684	33
4.85	-0.0344504	0.00974763	33		-0.0288064	0.00779209	33
4.9	-0.0239522	0.0106808	33		-0.0431481	0.00693488	33
4.95	-0.0320516	0.0110606	33		-0.0290989	0.00841409	33
5	-0.0259509	0.0115159	33		-0.0268465	0.0101072	33

## Sheet: Figure 2C i
Figure 2C'
5 dpf 0.2s stim	peak dF/F				Column B	Ru360 10 μM
	DMSO	Ru360 10 μM			vs.	vs.
Cell1	0.08655	0.05877			Column A	DMSO
Cell2	0.04898	0.03823
Cell3	0.07064	0.04181			Wilcoxon matched-pairs signed rank test
Cell4	0.08137	0.04424			P value	0.0001
Cell5	0.06164	0.09832			Exact or approximate P value?	Exact
Cell6	0.7108	0.2242			P value summary	***
Cell7	0.1356	0.1258			Significantly different (P < 0.05)?	Yes
Cell8	0.1468	0.1215			One- or two-tailed P value?	Two-tailed
Cell9	0.09084	0.04234			Sum of positive, negative ranks	77.00 , -484.0
Cell10	0.7009	0.2493			Sum of signed ranks (W)	-407
Cell11	0.1024	0.0717			Number of pairs	33
Cell12	0.1332	0.09308			Number of ties (ignored)	0
Cell13	0.06345	0.1555
Cell14	0.153	0.04722			Median of differences
Cell15	0.1798	0.07927			Median	-0.0513
Cell16	0.1225	0.126
Cell17	0.4252	0.3809			How effective was the pairing?
Cell18	0.1826	0.03222			rs (Spearman)	0.7443
Cell19	0.07129	0.01731			P value (one tailed)	<0.0001
Cell20	0.1495	0.06286			P value summary	****
Cell21	0.0593	0.01433			Was the pairing significantly effective?	Yes
Cell22	0.3384	0.2627
Cell23	0.2401	0.06453
Cell24	1.207	0.1795
Cell25	0.3627	0.3114
Cell26	0.2274	0.414
Cell27	0.2465	0.09452
Cell28	1.096	0.4794
Cell29	1.061	0.5451
Cell30	0.2856	0.4228
Cell31	0.7116	0.4807
Cell32	0.1622	0.105
Cell33	0.2568	0.1012

## Sheet: Figure 2D
Figure 2D
5 dpf 10s stim
pre-2uM Ru360	dF/F				2 uM Ru360	dF/F
Time (s)	average dF/F	SEM	n		average dF/F	SEM	n
-1.95	0.0225591	0.00781062	11		0.0235742	0.00941833	11
-1.9	0.00282608	0.00733334	11		0.0319126	0.00550328	11
-1.85	0.00374116	0.00921651	11		0.0104535	0.00567916	11
-1.8	0.0136579	0.0107581	11		0.0221671	0.00972615	11
-1.75	0.0312354	0.0171888	11		0.0148324	0.00725762	11
-1.7	0.0252884	0.011048	11		0.0198499	0.0102977	11
-1.65	0.00187537	0.0127678	11		0.0188439	0.0079649	11
-1.6	0.016119	0.0109507	11		0.01015	0.00372523	11
-1.55	-0.0034218	0.00813397	11		0.013834	0.0035055	11
-1.5	-0.004725	0.00524865	11		0.0105919	0.00654238	11
-1.45	-0.000274093	0.00619689	11		0.0132439	0.00831078	11
-1.4	-0.0146009	0.0097368	11		0.0218104	0.00646696	11
-1.35	0.00480695	0.0108159	11		0.00657413	0.00537514	11
-1.3	-0.00371946	0.00496202	11		0.00534639	0.00640585	11
-1.25	0.00900557	0.00627034	11		0.00206834	0.00576826	11
-1.2	0.010662	0.00616619	11		0.00120108	0.00675239	11
-1.15	0.00453121	0.00713051	11		0.00282007	0.00532719	11
-1.1	-0.0102298	0.00951769	11		0.0138175	0.00835437	11
-1.05	-0.000904729	0.00895404	11		0.0013469	0.0057362	11
-1	-0.0144606	0.0139471	11		-0.00109082	0.00522627	11
-0.95	-0.0149584	0.0050686	11		-0.00703634	0.00512094	11
-0.9	-0.015739	0.00623902	11		-0.00951546	0.00514322	11
-0.85	0.0100767	0.00560992	11		0.00347988	0.00614518	11
-0.8	-0.000362535	0.00861018	11		-0.00936356	0.006672	11
-0.75	0.0145768	0.0105357	11		-0.0105819	0.00434318	11
-0.7	0.00127995	0.00847348	11		-0.00441134	0.0063246	11
-0.65	0.00275557	0.00674448	11		-0.00670009	0.00720492	11
-0.6	0.00537168	0.00591583	11		-0.0201831	0.00928147	11
-0.55	0.00450595	0.00719731	11		-0.0132235	0.0055032	11
-0.5	-0.0045181	0.00532645	11		-0.00871547	0.00952535	11
-0.45	-0.0095851	0.0115333	11		-0.00683614	0.00874185	11
-0.4	-0.00134154	0.00709742	11		-0.0126845	0.0069519	11
-0.35	-0.0126812	0.0105577	11		-0.00638265	0.00844311	11
-0.3	-0.0322731	0.00892608	11		-0.0148442	0.00673036	11
-0.25	-0.00967745	0.00738962	11		-0.0182112	0.00781429	11
-0.2	-0.0122321	0.00521685	11		-0.0221842	0.00862576	11
-0.15	-0.00483953	0.00902755	11		-0.0182782	0.0088992	11
-0.0999999	-0.012992	0.00959874	11		-0.0132345	0.00822617	11
-0.05	0.00445349	0.00786794	11		-0.0294011	0.00827696	11
0	-0.00579178	0.00777896	11		-0.0150394	0.009441	11
0.05	0.0769849	0.0222186	11		0.0245422	0.0124074	11
0.0999999	0.108701	0.0358981	11		0.0171276	0.0181473	11
0.15	0.170579	0.0519705	11		0.0393407	0.0210467	11
0.2	0.213042	0.0633407	11		0.0347452	0.0220653	11
0.25	0.253661	0.0719363	11		0.0397437	0.0294698	11
0.3	0.282984	0.0800794	11		0.0423816	0.0275603	11
0.35	0.298023	0.0882436	11		0.0618134	0.030087	11
0.4	0.329874	0.0903216	11		0.0550082	0.0286695	11
0.45	0.331298	0.0923371	11		0.0624805	0.0270984	11
0.5	0.344515	0.0980329	11		0.0562192	0.0304493	11
0.55	0.364704	0.0965206	11		0.0545466	0.0290193	11
0.6	0.367555	0.0971238	11		0.0527457	0.031344	11
0.65	0.370663	0.0979262	11		0.0578053	0.0267021	11
0.7	0.380404	0.0989944	11		0.052364	0.0285369	11
0.75	0.387453	0.0996601	11		0.058007	0.0285094	11
0.8	0.388966	0.100846	11		0.0460322	0.0306129	11
0.85	0.401935	0.100886	11		0.0489525	0.0311576	11
0.9	0.405392	0.104363	11		0.0394243	0.0280028	11
0.95	0.419215	0.101234	11		0.0539646	0.0264326	11
1	0.436261	0.100448	11		0.0559069	0.0270877	11
1.05	0.41246	0.100561	11		0.0568841	0.0278902	11
1.1	0.432101	0.104204	11		0.0398815	0.0261323	11
1.15	0.449063	0.0998603	11		0.0393046	0.0286618	11
1.2	0.443939	0.10326	11		0.0321313	0.029971	11
1.25	0.455557	0.101166	11		0.049319	0.0297024	11
1.3	0.468314	0.10397	11		0.0339847	0.0285121	11
1.35	0.460427	0.106354	11		0.0377156	0.0269155	11
1.4	0.466536	0.102993	11		0.0593498	0.0287049	11
1.45	0.484843	0.103947	11		0.0485403	0.0272942	11
1.5	0.489131	0.105615	11		0.0353316	0.0275571	11
1.55	0.475904	0.108083	11		0.0562332	0.0291933	11
1.6	0.487732	0.109818	11		0.0408782	0.0259447	11
1.65	0.487683	0.110314	11		0.0320243	0.0304152	11
1.7	0.508248	0.115864	11		0.0376796	0.0302208	11
1.75	0.505026	0.109645	11		0.0344335	0.0309532	11
1.8	0.508187	0.110279	11		0.0290702	0.0286823	11
1.85	0.527748	0.118287	11		0.0336563	0.027758	11
1.9	0.518076	0.118405	11		0.0306626	0.0254037	11
1.95	0.534896	0.125561	11		0.0282238	0.0259948	11
2	0.528715	0.117209	11		0.0398885	0.0283835	11
2.05	0.547776	0.124777	11		0.024442	0.0278795	11
2.1	0.53974	0.119834	11		0.0332814	0.0249626	11
2.15	0.540872	0.122157	11		0.00544357	0.0318625	11
2.2	0.538751	0.121885	11		0.0388309	0.0283163	11
2.25	0.539182	0.121641	11		0.0267123	0.0265178	11
2.3	0.555828	0.135545	11		0.0315729	0.0293723	11
2.35	0.558308	0.129268	11		0.0244026	0.024492	11
2.4	0.563459	0.135684	11		0.0221119	0.0273871	11
2.45	0.569033	0.130751	11		0.0308976	0.0265606	11
2.5	0.562274	0.125638	11		0.00859363	0.0318911	11
2.55	0.578106	0.133134	11		0.0234481	0.0302929	11
2.6	0.57018	0.134678	11		0.0216379	0.0279992	11
2.65	0.581475	0.139429	11		0.00998396	0.0297148	11
2.7	0.584154	0.132267	11		0.00861656	0.0305746	11
2.75	0.567121	0.136363	11		0.0189523	0.0301445	11
2.8	0.58063	0.137093	11		0.015935	0.0311299	11
2.85	0.572094	0.13684	11		0.0153284	0.0317167	11
2.9	0.57752	0.136476	11		0.0274393	0.0258443	11
2.95	0.590778	0.143843	11		0.0202655	0.0276117	11
3	0.586828	0.149036	11		0.0198831	0.0277412	11
3.05	0.591043	0.143112	11		0.0251697	0.0256042	11
3.1	0.5909	0.137262	11		0.00524911	0.0313982	11
3.15	0.586647	0.146746	11		0.0270831	0.0249116	11
3.2	0.589235	0.136592	11		0.028748	0.0247857	11
3.25	0.577045	0.138342	11		0.0207499	0.0288801	11
3.3	0.58199	0.140243	11		0.0299593	0.0262192	11
3.35	0.589571	0.138029	11		0.0314473	0.0214513	11
3.4	0.587992	0.138936	11		0.0135244	0.0250421	11
3.45	0.5775	0.135419	11		0.020703	0.0311252	11
3.5	0.603186	0.14846	11		0.0135904	0.0254775	11
3.55	0.601993	0.142074	11		0.0242313	0.026371	11
3.6	0.601883	0.149393	11		0.0339514	0.0241388	11
3.65	0.603482	0.146896	11		0.0102698	0.0255576	11
3.7	0.596671	0.145043	11		0.0164208	0.0250932	11
3.75	0.601822	0.151604	11		0.0214228	0.0245459	11
3.8	0.591949	0.139438	11		0.0133245	0.0245433	11
3.85	0.605897	0.14656	11		0.0319522	0.0260719	11
3.9	0.593533	0.14439	11		0.0116738	0.0279854	11
3.95	0.60943	0.146962	11		0.00951347	0.0269985	11
4	0.596189	0.151646	11		0.0159965	0.0236397	11
4.05	0.595954	0.142408	11		0.0185122	0.0237988	11
4.1	0.600836	0.148753	11		0.0222384	0.0245673	11
4.15	0.600094	0.142135	11		0.00621983	0.0264749	11
4.2	0.604515	0.148229	11		0.0180187	0.0264215	11
4.25	0.605185	0.146139	11		0.016615	0.0267085	11
4.3	0.598408	0.145577	11		0.00971198	0.0263103	11
4.35	0.599342	0.15139	11		0.0135671	0.0256944	11
4.4	0.597221	0.146955	11		0.00287168	0.0243012	11
4.45	0.603057	0.150849	11		0.00611359	0.0285168	11
4.5	0.599278	0.143503	11		0.00187692	0.0289675	11
4.55	0.594026	0.143646	11		0.0111878	0.0229211	11
4.6	0.605465	0.144524	11		-0.000977683	0.0297969	11
4.65	0.595133	0.147698	11		0.00242972	0.0239289	11
4.7	0.609242	0.145723	11		0.0162989	0.0230724	11
4.75	0.607878	0.143835	11		0.0050871	0.0323199	11
4.8	0.607953	0.152883	11		-0.00449359	0.027245	11
4.85	0.602982	0.142488	11		0.000252362	0.0272729	11
4.9	0.612656	0.148016	11		-0.00148591	0.0257377	11
4.95	0.612811	0.148359	11		-3.938e-05	0.0272068	11
5	0.593227	0.142912	11		0.00530065	0.0241931	11
5.05	0.596555	0.149649	11		0.01268	0.0236645	11
5.1	0.607087	0.146107	11		0.00233025	0.0227499	11
5.15	0.594421	0.150946	11		0.00209958	0.0277421	11
5.2	0.593457	0.143545	11		1.06255e-05	0.0245052	11
5.25	0.599891	0.14232	11		-0.000771085	0.0263998	11
5.3	0.606718	0.149254	11		-0.00276997	0.0312869	11
5.35	0.606665	0.146409	11		0.0116799	0.0263472	11
5.4	0.594374	0.151162	11		-0.00105094	0.0287018	11
5.45	0.610183	0.142339	11		0.0190056	0.0231127	11
5.5	0.618871	0.144983	11		-0.00031422	0.0232192	11
5.55	0.590959	0.13809	11		0.0142492	0.0282345	11
5.6	0.593397	0.141635	11		-0.00131611	0.0271861	11
5.65	0.595802	0.143551	11		0.00127312	0.0284416	11
5.7	0.602579	0.145873	11		0.00352909	0.0258666	11
5.75	0.606074	0.149299	11		-0.00220773	0.0312171	11
5.8	0.604923	0.140532	11		-0.00508315	0.0290909	11
5.85	0.595566	0.14602	11		0.011486	0.0233277	11
5.9	0.600707	0.145907	11		0.00389954	0.0275282	11
5.95	0.593187	0.140372	11		6.06627e-05	0.0248094	11
6	0.610157	0.145433	11		0.00549674	0.0279704	11
6.05	0.592369	0.14258	11		-0.00431639	0.0235923	11
6.1	0.595193	0.155007	11		0.000257848	0.0228467	11
6.15	0.593981	0.138712	11		-0.000384723	0.0261192	11
6.2	0.596547	0.153589	11		0.00665551	0.0241587	11
6.25	0.609138	0.151825	11		0.00357582	0.0240011	11
6.3	0.595256	0.14365	11		0.00384916	0.0304423	11
6.35	0.600116	0.144007	11		0.00945282	0.0227668	11
6.4	0.596898	0.136335	11		0.00161047	0.0250362	11
6.45	0.589138	0.145097	11		0.00194026	0.026983	11
6.5	0.585303	0.142328	11		-0.0109407	0.0274308	11
6.55	0.581888	0.1402	11		-0.0104081	0.0254677	11
6.6	0.59405	0.144927	11		-0.00577518	0.0289718	11
6.65	0.586485	0.137102	11		-0.0135516	0.0277236	11
6.7	0.58125	0.142221	11		-0.00238877	0.0257755	11
6.75	0.581854	0.139708	11		0.00337019	0.029793	11
6.8	0.576183	0.14468	11		0.00343943	0.0231665	11
6.85	0.587988	0.140458	11		0.00911801	0.0248744	11
6.9	0.586712	0.137331	11		0.0135363	0.0219354	11
6.95	0.594798	0.143704	11		0.00315844	0.025443	11
7	0.580466	0.134635	11		0.00145961	0.0259883	11
7.05	0.578305	0.142858	11		-0.00471867	0.0263196	11
7.1	0.584733	0.140169	11		-0.00555973	0.0249476	11
7.15	0.570199	0.138507	11		0.000747576	0.0285876	11
7.2	0.574905	0.136003	11		-0.0103627	0.0254735	11
7.25	0.586734	0.138523	11		0.0106884	0.0259453	11
7.3	0.584445	0.145074	11		-3.32209e-05	0.0261783	11
7.35	0.579674	0.137475	11		-0.00960943	0.0302364	11
7.4	0.578757	0.14096	11		-0.0088545	0.0320704	11
7.45	0.576856	0.141513	11		-0.00338552	0.0294381	11
7.5	0.579502	0.136923	11		-0.0271871	0.0302222	11
7.55	0.581862	0.140747	11		-0.0122322	0.0323019	11
7.6	0.575455	0.133554	11		-0.0178792	0.031291	11
7.65	0.571066	0.135255	11		-0.00634114	0.0249135	11
7.7	0.585535	0.143477	11		0.00223566	0.0275752	11
7.75	0.583472	0.13495	11		-0.0201674	0.0274658	11
7.8	0.576066	0.133474	11		-0.00764223	0.0315793	11
7.85	0.578511	0.130681	11		-0.000344091	0.0269356	11
7.9	0.576309	0.133235	11		-0.010905	0.0282216	11
7.95	0.566264	0.132011	11		-0.00990232	0.0292263	11
8	0.56827	0.13268	11		-0.00183305	0.0284034	11
8.05	0.568527	0.130342	11		-0.0100615	0.0282284	11
8.1	0.577834	0.134259	11		-0.00967712	0.0249271	11
8.15	0.563999	0.13836	11		-0.00473485	0.0259429	11
8.2	0.560884	0.130851	11		-0.00204924	0.0259002	11
8.25	0.566341	0.133387	11		-0.0144934	0.0261471	11
8.3	0.556473	0.125697	11		-0.0186423	0.0304239	11
8.35	0.559425	0.132734	11		-0.0112731	0.024159	11
8.4	0.56287	0.130606	11		-0.0191965	0.0298495	11
8.45	0.575965	0.136414	11		-0.0240426	0.029424	11
8.5	0.572664	0.13702	11		-0.0058801	0.0241089	11
8.55	0.565454	0.132169	11		-0.0165956	0.0289225	11
8.6	0.565759	0.132286	11		-0.00808504	0.0240053	11
8.65	0.55344	0.127183	11		-0.0148502	0.0254347	11
8.7	0.560108	0.133324	11		-0.0203871	0.028054	11
8.75	0.577963	0.14077	11		-0.014675	0.0280326	11
8.8	0.559941	0.12781	11		-0.0242247	0.0321413	11
8.85	0.559087	0.138756	11		-0.0137427	0.0242802	11
8.9	0.552294	0.133046	11		-0.00578749	0.0249981	11
8.95	0.551004	0.129012	11		-0.0198559	0.029777	11
9	0.555716	0.133888	11		-0.017572	0.0271432	11
9.05	0.550965	0.13116	11		-0.0176256	0.0266932	11
9.1	0.546171	0.128831	11		-0.037752	0.0296319	11
9.15	0.554526	0.124017	11		-0.022571	0.0267396	11
9.2	0.546733	0.125155	11		-0.0202611	0.0303504	11
9.25	0.54374	0.127878	11		-0.0200643	0.0307803	11
9.3	0.552106	0.132417	11		-0.0211632	0.0293976	11
9.35	0.556329	0.132135	11		-0.021558	0.0300401	11
9.4	0.55755	0.13	11		-0.0322213	0.0310235	11
9.45	0.56728	0.137569	11		-0.0099651	0.0270771	11
9.5	0.540755	0.127004	11		-0.0252784	0.0262203	11
9.55	0.559066	0.12967	11		-0.0191446	0.0298481	11
9.6	0.543891	0.130448	11		-0.0289186	0.0299452	11
9.65	0.552006	0.131752	11		-0.0313455	0.0274009	11
9.7	0.555275	0.13596	11		-0.0250971	0.0264448	11
9.75	0.555668	0.12992	11		-0.0381634	0.0304664	11
9.8	0.550609	0.132492	11		-0.0265183	0.0241528	11
9.85	0.559753	0.121931	11		-0.0382358	0.0250507	11
9.9	0.541541	0.122666	11		-0.0193672	0.0227859	11
9.95	0.543539	0.120667	11		-0.0308203	0.0219643	11
10	0.545652	0.117853	11		-0.036722	0.0220305	11
10.05	0.527235	0.118852	11		-0.0356984	0.0224696	11
10.1	0.508969	0.107285	11		-0.0528331	0.0247288	11
10.15	0.498963	0.11174	11		-0.0459634	0.0216556	11
10.2	0.486411	0.105048	11		-0.0678365	0.0255049	11
10.25	0.49018	0.10729	11		-0.043858	0.0213024	11
10.3	0.471847	0.111466	11		-0.0426726	0.0206964	11
10.35	0.474324	0.103971	11		-0.0599527	0.0190397	11
10.4	0.473449	0.108165	11		-0.0457009	0.0176432	11
10.45	0.45373	0.0928187	11		-0.0330195	0.0168818	11
10.5	0.461807	0.101315	11		-0.0539936	0.0238668	11
10.55	0.450119	0.101417	11		-0.0494092	0.0216895	11
10.6	0.436685	0.0976084	11		-0.0541778	0.0212421	11
10.65	0.436734	0.0968559	11		-0.0597246	0.0220401	11
10.7	0.420423	0.0893627	11		-0.0513342	0.0238907	11
10.75	0.414967	0.0943661	11		-0.0688977	0.0250224	11
10.8	0.400266	0.0891624	11		-0.0587488	0.0215772	11
10.85	0.420409	0.087799	11		-0.051146	0.0151163	11
10.9	0.411885	0.0869124	11		-0.0616632	0.0239907	11
10.95	0.385976	0.0844804	11		-0.0519697	0.0165402	11
11	0.382418	0.0914509	11		-0.0644064	0.0210469	11
11.05	0.376691	0.082392	11		-0.0717635	0.0218147	11
11.1	0.379217	0.0886875	11		-0.0796644	0.0231216	11
11.15	0.378316	0.0791124	11		-0.0632538	0.0173523	11
11.2	0.38372	0.0835007	11		-0.075088	0.0234326	11
11.25	0.359999	0.0871155	11		-0.0664062	0.0221393	11
11.3	0.358827	0.0790607	11		-0.0594135	0.0215126	11
11.35	0.363868	0.086917	11		-0.0761126	0.0194336	11
11.4	0.359826	0.0809872	11		-0.066248	0.0216225	11
11.45	0.3414	0.0790644	11		-0.0740868	0.020899	11
11.5	0.348303	0.0764689	11		-0.0769997	0.0179925	11
11.55	0.32661	0.0775114	11		-0.0897165	0.0205328	11
11.6	0.325528	0.0739854	11		-0.082245	0.0240472	11
11.65	0.32021	0.0701055	11		-0.0734771	0.0223403	11
11.7	0.312885	0.0739963	11		-0.0803982	0.0216761	11
11.75	0.330569	0.0716096	11		-0.0779896	0.0206802	11
11.8	0.328267	0.0742523	11		-0.0689133	0.0187003	11
11.85	0.309399	0.0700611	11		-0.0727598	0.0201731	11
11.9	0.30963	0.0693861	11		-0.0813594	0.0171609	11
11.95	0.301564	0.0724649	11		-0.0802555	0.0168767	11
12	0.287342	0.0628939	11		-0.0886491	0.0230725	11
12.05	0.308693	0.0693061	11		-0.0781378	0.018054	11
12.1	0.287953	0.066548	11		-0.0808148	0.0179067	11
12.15	0.293759	0.067093	11		-0.0817694	0.0189661	11
12.2	0.285079	0.0696737	11		-0.071985	0.0147459	11
12.25	0.300464	0.0662431	11		-0.0854088	0.0180049	11
12.3	0.281541	0.0721989	11		-0.0810223	0.0152896	11
12.35	0.27905	0.0656046	11		-0.0877625	0.0177454	11
12.4	0.294078	0.0751961	11		-0.0869454	0.0197428	11
12.45	0.275355	0.0608308	11		-0.0860711	0.0161813	11
12.5	0.259136	0.0610755	11		-0.0991157	0.0232559	11
12.55	0.267707	0.0694877	11		-0.0654416	0.0150471	11
12.6	0.251299	0.0603252	11		-0.0843817	0.0196445	11
12.65	0.248376	0.063164	11		-0.0820352	0.014734	11
12.7	0.243503	0.0552806	11		-0.0960488	0.0161103	11
12.75	0.232774	0.0618023	11		-0.0771583	0.017143	11
12.8	0.238694	0.0576103	11		-0.10089	0.0201745	11
12.85	0.226939	0.0582823	11		-0.0814883	0.0201352	11
12.9	0.226308	0.0593998	11		-0.0842947	0.018895	11
12.95	0.221102	0.0521687	11		-0.0782925	0.0153779	11
13	0.214221	0.0543599	11		-0.106344	0.0225318	11
13.05	0.202278	0.0500612	11		-0.0995979	0.0210972	11
13.1	0.200282	0.0560252	11		-0.0914456	0.015762	11
13.15	0.208838	0.0556612	11		-0.0747655	0.016188	11
13.2	0.204622	0.0508157	11		-0.0926492	0.0194308	11
13.25	0.203483	0.056886	11		-0.077663	0.0175638	11
13.3	0.212315	0.0531651	11		-0.0827013	0.0203751	11
13.35	0.188831	0.0554044	11		-0.0905096	0.0187801	11
13.4	0.177994	0.0481804	11		-0.0884516	0.0184313	11
13.45	0.179798	0.0472163	11		-0.0920235	0.0223868	11
13.5	0.18844	0.0521668	11		-0.0982046	0.0213831	11
13.55	0.175074	0.0525222	11		-0.0996793	0.0209723	11
13.6	0.165066	0.0502991	11		-0.0874148	0.0156741	11
13.65	0.154805	0.0448981	11		-0.0923593	0.0167169	11
13.7	0.151745	0.0460219	11		-0.0927108	0.0147181	11
13.75	0.14629	0.0541482	11		-0.0931964	0.0199106	11
13.8	0.152417	0.0423699	11		-0.0933297	0.0207926	11
13.85	0.171646	0.0509398	11		-0.0949956	0.0191134	11
13.9	0.158525	0.043389	11		-0.100616	0.0190329	11
13.95	0.144354	0.0436939	11		-0.0932286	0.018594	11
14	0.144825	0.0419177	11		-0.10671	0.0214549	11
14.05	0.152907	0.0453749	11		-0.0970564	0.0169853	11
14.1	0.153174	0.0472147	11		-0.0880295	0.0161364	11
14.15	0.131851	0.0426253	11		-0.0882445	0.015535	11
14.2	0.141447	0.0452099	11		-0.0942798	0.0173138	11
14.25	0.132416	0.0403946	11		-0.0905133	0.0174588	11
14.3	0.144539	0.0438579	11		-0.0955812	0.0170387	11
14.35	0.142714	0.0417971	11		-0.101164	0.0196235	11
14.4	0.126014	0.0353517	11		-0.104859	0.0180322	11
14.45	0.122733	0.0416638	11		-0.101252	0.0199077	11
14.5	0.124273	0.0372241	11		-0.0947124	0.0163697	11
14.55	0.120161	0.043725	11		-0.0834176	0.0130332	11
14.6	0.11402	0.0354947	11		-0.0863524	0.0181441	11
14.65	0.0994991	0.0368758	11		-0.0943915	0.0165169	11
14.7	0.101143	0.0402445	11		-0.0884388	0.0165901	11
14.75	0.117184	0.0402479	11		-0.101399	0.0201107	11
14.8	0.0934717	0.0388071	11		-0.0953268	0.018971	11
14.85	0.102387	0.0338006	11		-0.104579	0.0196306	11
14.9	0.0812676	0.0374347	11		-0.0885366	0.0152571	11
14.95	0.106721	0.0349142	11		-0.0849184	0.0147598	11
15	0.0939224	0.0343727	11		-0.079859	0.0140372	11
15.05	0.103104	0.0384333	11		-0.0971679	0.0188821	11
15.1	0.0876087	0.0341296	11		-0.0993558	0.0163569	11
15.15	0.0846372	0.0402986	11		-0.103902	0.017141	11
15.2	0.0877723	0.0284816	11		-0.102609	0.0200847	11
15.25	0.0773693	0.0351652	11		-0.100314	0.0213664	11
15.3	0.0778121	0.0295073	11		-0.0911007	0.0172209	11
15.35	0.0741842	0.0308553	11		-0.0965743	0.0174925	11
15.4	0.0708937	0.0340922	11		-0.089099	0.0146641	11
15.45	0.0747553	0.0296371	11		-0.103872	0.0209518	11
15.5	0.0499761	0.0343289	11		-0.088655	0.0149292	11
15.55	0.0471815	0.0296971	11		-0.0965569	0.0152598	11
15.6	0.0504025	0.0324035	11		-0.0984003	0.0145244	11
15.65	0.053133	0.0305711	11		-0.0960311	0.0179828	11
15.7	0.0506839	0.0317052	11		-0.106544	0.0196397	11
15.75	0.0428337	0.0343196	11		-0.105737	0.0187243	11
15.8	0.03788	0.0251944	11		-0.102355	0.0182568	11
15.85	0.0432245	0.0347018	11		-0.0898128	0.0140562	11
15.9	0.0376901	0.026313	11		-0.0919022	0.0137381	11
15.95	0.0357267	0.0340315	11		-0.0957642	0.016751	11
16	0.0273407	0.0280576	11		-0.0996761	0.0136749	11
16.05	0.0365151	0.0263146	11		-0.089088	0.0150723	11
16.1	0.0412553	0.0325813	11		-0.0943323	0.0163654	11
16.15	0.0457332	0.0267851	11		-0.0911085	0.0166627	11
16.2	0.0230436	0.0276866	11		-0.100625	0.0178735	11
16.25	0.0234391	0.0249989	11		-0.0943051	0.0156739	11
16.3	0.0207077	0.0285984	11		-0.110536	0.0199344	11
16.35	0.032041	0.0283269	11		-0.0923639	0.0136793	11
16.4	0.00847339	0.0249487	11		-0.091024	0.0136732	11
16.45	-0.00836756	0.0347978	11		-0.097714	0.0161844	11
16.5	-0.000273307	0.0260598	11		-0.097795	0.0159641	11
16.55	0.0012674	0.0293315	11		-0.103874	0.0165719	11
16.6	-0.00113186	0.0259853	11		-0.107078	0.0182071	11
16.65	-0.00451704	0.0317257	11		-0.110749	0.0178903	11
16.7	0.00219895	0.0259427	11		-0.100013	0.0190668	11
16.75	-0.00826433	0.0283994	11		-0.100411	0.0161541	11
16.8	-0.014036	0.0319742	11		-0.105034	0.0150713	11
16.85	-0.00497913	0.0230136	11		-0.0931639	0.0142529	11
16.9	-0.0202983	0.0300661	11		-0.10941	0.0193455	11
16.95	-0.0119701	0.0254348	11		-0.0949175	0.0167021	11
17	-0.00891559	0.0317106	11		-0.107563	0.0158321	11
17.05	-0.0192283	0.0262573	11		-0.104375	0.0162089	11
17.1	-0.00616662	0.0236806	11		-0.0954319	0.0152336	11
17.15	-0.0256488	0.0284787	11		-0.100597	0.0153649	11
17.2	-0.02636	0.0249611	11		-0.0963201	0.0155989	11
17.25	-0.0294248	0.028701	11		-0.0866964	0.0146084	11
17.3	-0.0291512	0.0314405	11		-0.0945756	0.0161563	11
17.35	-0.0315662	0.023847	11		-0.0985849	0.0172149	11
17.4	-0.0279499	0.0289153	11		-0.0955012	0.0140551	11
17.45	-0.032143	0.0240277	11		-0.103512	0.0157939	11
17.5	-0.0474902	0.030142	11		-0.0960369	0.0124027	11
17.55	-0.04456	0.0241659	11		-0.105217	0.0143979	11
17.6	-0.0470109	0.031295	11		-0.104155	0.0178534	11
17.65	-0.0556317	0.0272941	11		-0.0984257	0.0153343	11
17.7	-0.0598524	0.0269236	11		-0.105088	0.0176668	11
17.75	-0.0538582	0.0297935	11		-0.0979867	0.0147556	11
17.8	-0.047442	0.0288046	11		-0.100757	0.0171302	11
17.85	-0.0583264	0.0337505	11		-0.0997428	0.015256	11
17.9	-0.0385484	0.0250453	11		-0.0930777	0.0119362	11
17.95	-0.0559515	0.0242412	11		-0.100217	0.016976	11
18	-0.064891	0.0305497	11		-0.0901862	0.0138163	11
18.05	-0.046358	0.0288222	11		-0.100502	0.0160586	11
18.1	-0.0641803	0.0280049	11		-0.102182	0.0148569	11
18.15	-0.050718	0.0254184	11		-0.0862369	0.0129823	11
18.2	-0.057898	0.0286445	11		-0.0978533	0.0137493	11
18.25	-0.0693411	0.0260767	11		-0.0908915	0.0136525	11
18.3	-0.0675078	0.0299539	11		-0.102821	0.016134	11
18.35	-0.0627872	0.0311229	11		-0.107461	0.0177072	11
18.4	-0.0704501	0.0264477	11		-0.108235	0.0155676	11
18.45	-0.0734905	0.0328626	11		-0.102658	0.0160478	11
18.5	-0.0641182	0.0240728	11		-0.104612	0.0145189	11
18.55	-0.0648007	0.0287441	11		-0.0993503	0.0109988	11
18.6	-0.0721842	0.0254926	11		-0.115952	0.0161469	11
18.65	-0.0627408	0.0282965	11		-0.11572	0.0163801	11
18.7	-0.0865998	0.0335414	11		-0.105479	0.0155407	11
18.75	-0.0804708	0.025452	11		-0.0985468	0.0167947	11
18.8	-0.0819313	0.0274571	11		-0.113024	0.0144932	11
18.85	-0.0563141	0.0243461	11		-0.110015	0.0150409	11
18.9	-0.0723822	0.0328573	11		-0.112735	0.016148	11
18.95	-0.0649185	0.0279149	11		-0.107907	0.014863	11
19	-0.0789807	0.0280753	11		-0.0890638	0.0119359	11
19.05	-0.0676266	0.0269081	11		-0.104202	0.0121203	11
19.1	-0.0844572	0.0278831	11		-0.108605	0.0128797	11
19.15	-0.0832037	0.0315188	11		-0.100576	0.0181193	11
19.2	-0.0764359	0.0282625	11		-0.125241	0.0150261	11
19.25	-0.0775098	0.0310324	11		-0.109486	0.0138746	11
19.3	-0.0936527	0.0285175	11		-0.111095	0.0108595	11
19.35	-0.0702787	0.0254489	11		-0.0969818	0.0127482	11
19.4	-0.0819394	0.0271807	11		-0.103462	0.012756	11
19.45	-0.0793254	0.0270983	11		-0.0990682	0.0143612	11
19.5	-0.076878	0.0325504	11		-0.0864677	0.0114951	11
19.55	-0.0754745	0.0284862	11		-0.110484	0.0148627	11
19.6	-0.085566	0.0297518	11		-0.112827	0.0156534	11
19.65	-0.0897094	0.0337044	11		-0.107573	0.0128947	11
19.7	-0.0896684	0.028741	11		-0.0903179	0.0111218	11
19.75	-0.076155	0.0298557	11		-0.112686	0.0147964	11
19.8	-0.0815359	0.0252798	11		-0.103731	0.0161427	11
19.85	-0.0840548	0.030657	11		-0.103676	0.0143584	11
19.9	-0.0735256	0.0259386	11		-0.102795	0.0147	11
19.95	-0.0728611	0.029809	11		-0.104438	0.016356	11
20	-0.078063	0.0304907	11		-0.104397	0.0140791	11
20.05	-0.0881252	0.0274788	11		-0.115304	0.0138132	11
20.1	-0.0881828	0.033335	11		-0.104037	0.0125021	11
20.15	-0.0816007	0.0264696	11		-0.102258	0.0122332	11
20.2	-0.0912851	0.0344025	11		-0.104808	0.0138783	11
20.25	-0.102913	0.0287212	11		-0.114181	0.0158162	11
20.3	-0.0825385	0.032828	11		-0.104898	0.0162946	11
20.35	-0.0838474	0.0276378	11		-0.110569	0.0136189	11
20.4	-0.090549	0.025956	11		-0.102223	0.0166087	11
20.45	-0.0973559	0.0286626	11		-0.108881	0.0131316	11
20.5	-0.0875907	0.0250451	11		-0.106797	0.0144843	11
20.55	-0.0823597	0.0273924	11		-0.101569	0.0159428	11
20.6	-0.0837797	0.0237986	11		-0.113957	0.0187494	11
20.65	-0.0943657	0.0252555	11		-0.104179	0.0163507	11
20.7	-0.0959101	0.028127	11		-0.106464	0.0175908	11
20.75	-0.0899986	0.0293759	11		-0.118772	0.01536	11
20.8	-0.0943971	0.0265234	11		-0.121489	0.0171391	11
20.85	-0.0781419	0.0231287	11		-0.125309	0.0146678	11
20.9	-0.1023	0.0271018	11		-0.119188	0.0166565	11
20.95	-0.0976957	0.0257568	11		-0.109699	0.0170619	11
21	-0.0875623	0.0255337	11		-0.109252	0.0165327	11
21.05	-0.09074	0.0290522	11		-0.116534	0.0144941	11
21.1	-0.0957628	0.0249413	11		-0.123079	0.0193773	11
21.15	-0.0966915	0.032012	11		-0.106865	0.0150892	11
21.2	-0.097485	0.0287125	11		-0.116751	0.0152299	11
21.25	-0.0853689	0.0231263	11		-0.11057	0.017091	11
21.3	-0.101623	0.0267585	11		-0.110525	0.0132406	11
21.35	-0.0917881	0.0270678	11		-0.108343	0.0208617	11
21.4	-0.0991063	0.0234495	11		-0.105123	0.0120385	11
21.45	-0.087998	0.0271252	11		-0.102939	0.0165626	11
21.5	-0.102122	0.029181	11		-0.12227	0.0164463	11
21.55	-0.0810035	0.026471	11		-0.121345	0.0167933	11
21.6	-0.109818	0.0328581	11		-0.115647	0.0169629	11
21.65	-0.0970624	0.028856	11		-0.114872	0.0183149	11
21.7	-0.103543	0.0261851	11		-0.119752	0.0177316	11
21.75	-0.105194	0.0254939	11		-0.112316	0.0139137	11
21.8	-0.0981735	0.0239728	11		-0.114245	0.0168395	11
21.85	-0.104806	0.0319668	11		-0.121618	0.0181446	11
21.9	-0.102661	0.027441	11		-0.122561	0.0180911	11
21.95	-0.109601	0.0263171	11		-0.124039	0.0179418	11
22	-0.112267	0.022134	11		-0.117927	0.0168687	11
22.05	-0.101302	0.0260948	11		-0.123361	0.0167909	11
22.1	-0.105978	0.0241474	11		-0.124771	0.0186909	11
22.15	-0.106758	0.0227088	11		-0.114853	0.0131781	11
22.2	-0.118678	0.032247	11		-0.121716	0.0176258	11
22.25	-0.0999536	0.0257201	11		-0.112614	0.0175116	11
22.3	-0.10481	0.0300013	11		-0.118717	0.0158798	11
22.35	-0.103246	0.0269244	11		-0.126917	0.0170647	11
22.4	-0.112916	0.0275539	11		-0.113411	0.013813	11
22.45	-0.111946	0.0288345	11		-0.121239	0.017356	11
22.5	-0.117818	0.0240376	11		-0.130013	0.0172216	11
22.55	-0.11389	0.0265055	11		-0.119342	0.0174908	11
22.6	-0.113224	0.026023	11		-0.120502	0.0169635	11
22.65	-0.117321	0.0291403	11		-0.125972	0.0157702	11
22.7	-0.115456	0.0290946	11		-0.108792	0.015272	11
22.75	-0.112937	0.0246219	11		-0.120916	0.0179075	11
22.8	-0.116754	0.0257836	11		-0.122873	0.0176576	11
22.85	-0.123312	0.0206792	11		-0.11651	0.0156284	11
22.9	-0.111134	0.0308805	11		-0.117791	0.0171331	11
22.95	-0.116913	0.0259453	11		-0.118422	0.0178355	11
23	-0.111821	0.0232068	11		-0.115844	0.018009	11
23.05	-0.118732	0.0316634	11		-0.109703	0.0162617	11
23.1	-0.127216	0.0312009	11		-0.113408	0.0150197	11
23.15	-0.127435	0.0290244	11		-0.118031	0.0175848	11
23.2	-0.0938049	0.0309319	11		-0.122172	0.0186835	11
23.25	-0.125459	0.0306541	11		-0.118508	0.0159251	11
23.3	-0.12288	0.0310998	11		-0.113889	0.0186347	11
23.35	-0.124709	0.0228508	11		-0.12372	0.0155697	11
23.4	-0.12084	0.0276058	11		-0.124841	0.0193838	11
23.45	-0.116016	0.0226106	11		-0.124921	0.0199047	11
23.5	-0.111993	0.0245323	11		-0.115727	0.0166268	11
23.55	-0.13196	0.0309336	11		-0.131315	0.0186768	11
23.6	-0.11296	0.0311758	11		-0.127215	0.0175464	11
23.65	-0.127233	0.0281036	11		-0.128976	0.0180051	11
23.7	-0.123765	0.0255326	11		-0.120699	0.0169252	11
23.75	-0.130727	0.027988	11		-0.119724	0.017627	11
23.8	-0.116982	0.0269687	11		-0.136894	0.0211566	11
23.85	-0.118389	0.0257062	11		-0.137391	0.0182508	11
23.9	-0.123582	0.0257139	11		-0.126545	0.0175828	11
23.95	-0.114577	0.0265855	11		-0.121849	0.0180733	11
24	-0.128977	0.0249304	11		-0.133209	0.0180211	11
24.05	-0.119613	0.0234656	11		-0.128566	0.0215928	11
24.1	-0.123706	0.0307298	11		-0.121147	0.0164733	11
24.15	-0.128334	0.0272678	11		-0.124945	0.0178128	11
24.2	-0.116701	0.0310766	11		-0.129879	0.016813	11
24.25	-0.126206	0.0256296	11		-0.125848	0.0175881	11
24.3	-0.130616	0.0267918	11		-0.121672	0.0178192	11
24.35	-0.114373	0.027329	11		-0.13403	0.0211714	11
24.4	-0.120991	0.0263867	11		-0.125268	0.0171109	11
24.45	-0.119572	0.0258304	11		-0.123969	0.0151054	11
24.5	-0.120722	0.025289	11		-0.120005	0.0189572	11
24.55	-0.132035	0.0262152	11		-0.128317	0.0211182	11
24.6	-0.117434	0.0251526	11		-0.118771	0.0169968	11
24.65	-0.115148	0.0244942	11		-0.134826	0.0202519	11
24.7	-0.127776	0.027382	11		-0.132214	0.0196991	11
24.75	-0.115683	0.0298156	11		-0.126191	0.0220206	11
24.8	-0.1248	0.0287751	11		-0.136373	0.0198623	11
24.85	-0.120483	0.0291577	11		-0.135297	0.020563	11
24.9	-0.120945	0.0267877	11		-0.120417	0.0168651	11
24.95	-0.120173	0.0250722	11		-0.122219	0.0196975	11
25	-0.121553	0.0250997	11		-0.136814	0.0204826	11
25.05	-0.118583	0.0296112	11		-0.119505	0.0173513	11
25.1	-0.118546	0.0255904	11		-0.143069	0.0175098	11
25.15	-0.12223	0.0269035	11		-0.125853	0.018125	11
25.2	-0.112218	0.0295346	11		-0.134055	0.0207133	11
25.25	-0.120359	0.0279791	11		-0.137852	0.0183955	11
25.3	-0.113965	0.0264994	11		-0.134158	0.0213492	11
25.35	-0.107241	0.0273158	11		-0.11315	0.0198173	11
25.4	-0.116398	0.0265609	11		-0.127516	0.0198487	11
25.45	-0.126309	0.0291042	11		-0.137281	0.0196546	11
25.5	-0.118543	0.0259318	11		-0.129559	0.0197197	11
25.55	-0.113493	0.0261714	11		-0.121736	0.0176339	11
25.6	-0.117333	0.0284565	11		-0.138578	0.0197848	11
25.65	-0.11677	0.0255712	11		-0.14202	0.0177777	11
25.7	-0.118223	0.0285123	11		-0.133906	0.0159702	11
25.75	-0.128305	0.028215	11		-0.120604	0.0186417	11
25.8	-0.131068	0.0298071	11		-0.129346	0.017398	11
25.85	-0.116881	0.026642	11		-0.129959	0.0174732	11
25.9	-0.137356	0.0250022	11		-0.135588	0.021633	11
25.95	-0.133581	0.0268786	11		-0.137083	0.0180464	11
26	-0.128519	0.0286881	11		-0.13875	0.0196555	11
26.05	-0.138514	0.0281309	11		-0.137227	0.0224519	11
26.1	-0.13675	0.0328099	11		-0.128773	0.019202	11
26.15	-0.127099	0.0279293	11		-0.136529	0.0194566	11
26.2	-0.13499	0.0354876	11		-0.136854	0.018928	11
26.25	-0.145333	0.0300057	11		-0.127984	0.0188524	11
26.3	-0.129458	0.0279908	11		-0.134162	0.0195779	11
26.35	-0.141197	0.0285683	11		-0.133024	0.0155148	11
26.4	-0.137851	0.0253586	11		-0.136357	0.022845	11
26.45	-0.129206	0.0297845	11		-0.13775	0.0197543	11
26.5	-0.130037	0.0278796	11		-0.13077	0.0174912	11
26.55	-0.128564	0.027335	11		-0.148541	0.017972	11
26.6	-0.138918	0.0307781	11		-0.146638	0.0184249	11
26.65	-0.139177	0.0283807	11		-0.136192	0.0183365	11
26.7	-0.141624	0.0308818	11		-0.128347	0.0154321	11
26.75	-0.13558	0.0294271	11		-0.138887	0.0222552	11
26.8	-0.140902	0.0283533	11		-0.129163	0.0190842	11
26.85	-0.139604	0.0288217	11		-0.136247	0.018681	11
26.9	-0.132403	0.0293133	11		-0.133004	0.0176641	11
26.95	-0.129225	0.0303811	11		-0.138362	0.0204064	11
27	-0.145794	0.0316273	11		-0.141048	0.0204594	11

## Sheet: Figure 2D i
Figure 2D'
5 dpf 10 s stim	peak dF/F
	DMSO	Ru360 2 μM	DMSO	Ru360 10 μM			Column B	Ru360 2 μM		Column D	Ru360 10 μM
Cell1	1.001	0.1742					vs.	vs.		vs.	vs.
Cell2	1.81	0.1433					Column A	DMSO		Column C	DMSO
Cell3	1.085	0.3378
Cell4	0.2934	-0.00308					Wilcoxon matched-pairs signed rank test			Wilcoxon matched-pairs signed rank test
Cell5	0.4584	0.1796					P value	0.001		P value	0.0003
Cell6	0.7085	0.05322					Exact or approximate P value?	Exact		Exact or approximate P value?	Exact
Cell7	0.2288	0.09057					P value summary	***		P value summary	***
Cell8	0.5477	0.04263					Significantly different (P < 0.05)?	Yes		Significantly different (P < 0.05)?	Yes
Cell9	0.353	0.0596					One- or two-tailed P value?	Two-tailed		One- or two-tailed P value?	Two-tailed
Cell10	0.1936	0.1156					Sum of positive, negative ranks	0.000 , -66.00		Sum of positive, negative ranks	13.00 , -177.0
Cell11	0.3022	0.1055					Sum of signed ranks (W)	-66		Sum of signed ranks (W)	-164
							Number of pairs	11		Number of pairs	19
							Number of ties (ignored)	0		Number of ties (ignored)	0
Cell1			0.3445	0.002339			Median of differences			Median of differences
Cell2			0.533	0.2687			Median	-0.2965		Median	-0.2713
Cell3			0.5389	0.2234
Cell4			1.196	0.5242			How effective was the pairing?			How effective was the pairing?
Cell5			0.4162	0.4895			rs (Spearman)	0.4091		rs (Spearman)	0.4386
Cell6			0.4313	0.5969			P value (one tailed)	0.107		P value (one tailed)	0.0302
Cell7			0.9818	0.5387			P value summary	ns		P value summary	*
Cell8			1.261	0.6302			Was the pairing significantly effective?	No		Was the pairing significantly effective?	Yes
Cell9			0.4106	0.5891
Cell10			0.3362	0.1698
Cell11			0.684	0.2774
Cell12			0.8834	0.03139
Cell13			0.3436	0.07812
Cell14			0.2345	-0.03678
Cell15			0.2223	0.1361
Cell16			0.7173	0.04048
Cell17			0.2546	0.1365
Cell18			0.3054	0.188
Cell19			0.501	0.1155

## Sheet: Figure 2G
Figure 2G
CaV1.3+MAGUK % per NM		MAGUK ONLY per NM				Table Analyzed	Cav1.3+MAGUK % total		MAGUK only % total
DMSO	Ru360 2 μM	DMSO	Ru360 2 μM
100	100	0	0			Column B	Ru360 2 μM		Ru360 2 μM
83.0189	100	16.9811	0			vs.	vs.		vs.
90.9091	86.4865	9.09091	13.5135			Column A	DMSO		DMSO
100	96.7742	0	3.22581
90.9091	97.7273	9.09091	2.27273			Unpaired t test with Welch's correction
92	81.25	8	18.75			P value	0.3347		0.3347
90	90.9091	10	9.09091			P value summary	ns		ns
72.2222	94.9153	27.7778	5.08475			Significantly different (P < 0.05)?	No		No
93.617	96.5517	6.38298	3.44828			One- or two-tailed P value?	Two-tailed		Two-tailed
						Welch-corrected t, df	t=0.9971, df=14.85		t=0.9971, df=14.85
						How big is the difference?
						Mean of column A	90.3		9.703
						Mean of column B	93.85		6.154
						Difference between means (B - A) ± SEM	3.549 ± 3.559		-3.549 ± 3.559
						95% confidence interval	-4.044 to 11.14		-11.14 to 4.044
						R squared (eta squared)	0.06273		0.06273
						F test to compare variances
						F, DFn, Dfd	1.770, 8, 8		1.770, 8, 8
						P value	0.4369		0.4369
						P value summary	ns		ns
						Significantly different (P < 0.05)?	No		No
						Data analyzed
						Sample size, column A	9		9
						Sample size, column B	9		9

## Sheet: Figure 2H
Figure 2H
Cav1.3 integrated intensity
DMSO	Ru360 2 μM			Table Analyzed	Cav1.3 integrated intensity
19.63	18.79
18.64	21.57			Column B	Ru360 2 μM
10.01	18.64			vs.	vs.
12.68	24.81			Column A	DMSO
19.12	14.68
14.74	19.95			Unpaired t test with Welch's correction
16.05	21.19			P value	0.0169
	26.1			P value summary	*
	34.87			Significantly different (P < 0.05)?	Yes
				One- or two-tailed P value?	Two-tailed
				Welch-corrected t, df	t=2.724, df=13.49
				How big is the difference?
				Mean of column A	15.84
				Mean of column B	22.29
				Difference between means (B - A) ± SEM	6.450 ± 2.368
				95% confidence interval	1.352 to 11.55
				R squared (eta squared)	0.3549
				F test to compare variances
				F, DFn, Dfd	2.588, 8, 6
				P value	0.263
				P value summary	ns
				Significantly different (P < 0.05)?	No
				Data analyzed
				Sample size, column A	7
				Sample size, column B	9
