# Supplementary material for: Synaptic mitochondria regulate hair-cell synapse size and function
Source: eLife journal article supplement (doi:10.7554/elife.48914), 2019-10-14
Supplement: supp [file elife-48914-supp-v1.zip › elife_poa_e48914_Figure_3_figure_supplement_1_source_data_1.xlsx]

## Sheet: Figure 3-figure sup1 A-C
Figure 3-figure supplement 1 A-C
								Table Analyzed	Area RibB		Area MAGUK		Area Rib b ALL only
		5 dpf
Ribeye b Area				MAGUK Area				Column B	PLL		PLL		Ru360 2 μM
ALL	Ru360 2 μM	PLL		ALL	PLL			vs.	vs.		vs.		vs.
0.3052	0.3202	0.2801		0.2194	0.1931			Column A	ALL		ALL		DMSO
0.2922	0.3563	0.2932		0.2242	0.1945
0.243	0.36	0.4031		0.1953	0.2298			Unpaired t test with Welch's correction
0.3716	0.3464	0.3651		0.1859	0.188			P value	0.2309		0.0601		0.7153
0.3223	0.3869	0.3296		0.2593	0.2014			P value summary	ns		ns		ns
0.4426	0.4348	0.2869		0.1831	0.2584			Significantly different (P < 0.05)?	No		No		No
0.3241	0.332	0.3174		0.1862	0.2156			One- or two-tailed P value?	Two-tailed		Two-tailed		Two-tailed
0.4173	0.405	0.3309		0.1931	0.2431			Welch-corrected t, df	t=1.241, df=17.75		t=1.992, df=20.13		t=0.3703, df=18.76
0.3614	0.2344	0.2739		0.1667	0.2468
0.3329	0.2808	0.3388		0.1648	0.2112			How big is the difference?
0.346	0.1887	0.2982		0.1632	0.2462			Mean of column A	0.3417		0.1947		0.3417
		0.2799			0.1855			Mean of column B	0.3164		0.2178		0.3314
								Difference between means (B - A) ± SEM	-0.02527 ± 0.02037		0.02315 ± 0.01162		-0.01028 ± 0.02776
								95% confidence interval	-0.06810 to 0.01757		-0.001078 to 0.04737		-0.06844 to 0.04788
								R squared (eta squared)	0.0798		0.1647		0.007258
								F test to compare variances
								F, DFn, Dfd	2.041, 10, 11		1.266, 10, 11		1.693, 10, 10
								P value	0.2577		0.7017		0.4193
								P value summary	ns		ns		ns
								Significantly different (P < 0.05)?	No		No		No
								Data analyzed
								Sample size, column A	11		11		11
								Sample size, column B	12		12		11
