# Supplementary material for: Synaptic mitochondria regulate hair-cell synapse size and function
Source: eLife journal article supplement (doi:10.7554/elife.48914), 2019-10-14
Supplement: supp [file elife-48914-supp-v1.zip › elife_poa_e48914_Figure_3_figure_supplement_2_source_data_1.xlsx]

## Sheet: FIGURE 3 S2
5d
							Column B	Ru360 2 μM 1 hr	Ru360 10 μM 30'	Ru360 10 μM 1 hr
DMSO	Ru360 2 μM 1 hr	DMSO	Ru360 10 μM 30'	DMSO	Ru360 10 μM 1hr		vs.	vs.	vs.	vs.
0.1931	0.1414	0.1462	0.1781	0.2441	0.2419		Column A	DMSO	DMSO	DMSO
0.1945	0.1783	0.1521	0.1922	0.13	0.198
0.2298	0.1203	0.1451	0.1439	0.1339	0.2085		Unpaired t test with Welch's correction
0.188	0.2357	0.1712	0.1878	0.1211	0.1662		P value	0.1386	0.5954	0.4777
0.2014	0.177	0.2075	0.1374	0.1722	0.08		P value summary	ns	ns	ns
0.2584	0.2434	0.1748	0.206	0.1953	0.2182		Significantly different (P < 0.05)?	No	No	No
0.2156	0.2264	0.1658	0.1964	0.2401	0.2201		One- or two-tailed P value?	Two-tailed	Two-tailed	Two-tailed
0.2431	0.1782	0.2336	0.1833	0.2343	0.2566		t, df	t=1.537, df=22	t=0.5389, df=22	t=0.7244, df=19
0.2468	0.2394	0.1601	0.1776	0.2144	0.2281
0.2112	0.2434	0.2064	0.124		0.253		How big is the difference?
0.2462	0.1715	0.1961	0.1501		0.1963		Mean of column A	0.2178	0.1775	0.1873
0.1855	0.1965	0.1714	0.1825		0.1681		Mean of column B	0.196	0.1716	0.2029
							Difference between means (B - A) ± SEM	-0.02184 ± 0.01421	-0.005917 ± 0.01098	0.01565 ± 0.02160
							95% confidence interval	-0.05132 to 0.007633	-0.02869 to 0.01685	-0.02957 to 0.06087
							R squared (eta squared)	0.09695	0.01303	0.02688
							F test to compare variances
							F, DFn, Dfd	2.564, 11, 11	1.126, 11, 11	1.052, 8, 11
							P value	0.1336	0.8475	0.9124
							P value summary	ns	ns	ns
							Significantly different (P < 0.05)?	No	No	No
							Data analyzed
							Sample size, column A	12	12	9
							Sample size, column B	12	12	12
