# Supplementary material for: Synaptic mitochondria regulate hair-cell synapse size and function
Source: eLife journal article supplement (doi:10.7554/elife.48914), 2019-10-14
Supplement: supp [file elife-48914-supp-v1.zip › elife_poa_e48914_Figure_3_source_data_1.xlsx]

## Sheet: Figure 3E
Figure 3E
Synapse/Hair cell
DMSO	Ru360 2 μM 1 hr	DMSO	Ru360 10 μM 30'	DMSO	Ru360 10 μM 1 hr		Table Analyzed	5 dpf HC counts 10uM Ru360		Table Analyzed	5 dpf HC counts 10uM Ru360		Table Analyzed	5 dpf HC counts 10uM Ru360
3.25	2	3.3125	3.07143	2.76471	2.4
3.38462	3.33333	3.5	2.07692	2.83333	2.55556		Column B	Ru360 2 μM 1 hr		Column D	Ru360 10 μM 30'		Column F	Ru360 10 μM 1hr
3.33333	3	3	2.71429	3.21053	2		vs.	vs.		vs.	vs.		vs.	vs.
2.64286	3	2.61111	2.93333	3.63158	2.38462		Column A	DMSO		Column C	DMSO		Column E	DMSO
3.58333	3	3.25	2.94118	3.13333	2.7
2.66667	3.125	3.35714	2.9375	3.17647	1.83333		Unpaired t test			Unpaired t test			Unpaired t test
3.2	3.07692	3.10526	2.71429	2.38889	3.5		P value	>0.9999		P value	0.5288		P value	<0.0001
3.15385	2.92857	2.1	2.70588	2.52174	3		P value summary	ns		P value summary	ns		P value summary	****
2.71429	3.5	2.84211	2.21429	3.17647	2.09091		Significantly different (P < 0.05)?	No		Significantly different (P < 0.05)?	No		Significantly different (P < 0.05)?	Yes
3.71429	2.8	3	2.5		2.92308		One- or two-tailed P value?	Two-tailed		One- or two-tailed P value?	Two-tailed		One- or two-tailed P value?	Two-tailed
3.3	4.22222	4	2.7		1.64706		t, df	t=0.000, df=22		t, df	t=0.6400, df=22		t, df	t=6.268, df=19
2.33333	2.83333	3.21053	2.85714		1.71429
							How big is the difference?			How big is the difference?			How big is the difference?
							Mean of column A	12.17		Mean of column C	16.25		Mean of column E	18.11
							Mean of column B	12.17		Mean of column D	15.5		Mean of column F	12
							Difference between means (B - A) ± SEM	0.000 ± 0.9101		Difference between means (D - C) ± SEM	-0.7500 ± 1.172		Difference between means (F - E) ± SEM	-6.111 ± 0.9750
							95% confidence interval	-1.887 to 1.887		95% confidence interval	-3.180 to 1.680		95% confidence interval	-8.152 to -4.070
							R squared (eta squared)	0		R squared (eta squared)	0.01828		R squared (eta squared)	0.674
							F test to compare variances			F test to compare variances			F test to compare variances
							F, DFn, Dfd	1.504, 11, 11		F, DFn, Dfd	2.699, 11, 11		F, DFn, Dfd	1.010, 11, 8
							P value	0.5098		P value	0.1143		P value
							P value summary	ns		P value summary	ns		P value summary
							Significantly different (P < 0.05)?	No		Significantly different (P < 0.05)?	No		Significantly different (P < 0.05)?	No
							Data analyzed			Data analyzed			Data analyzed
							Sample size, column A	12		Sample size, column C	12		Sample size, column E	9
							Sample size, column B	12		Sample size, column D	12		Sample size, column F	12

## Sheet: Figure 3F
Figure 3F
Ribbon area
DMSO	Ru360 2 μM 1 hr	DMSO	Ru360 10 μM 30'	DMSO	Ru360 10 μM 1 hr		Column B	Ru360 2 μM 1 hr		Column D	Ru360 10 μM 30'		Column F	Ru360 10 μM 1 hr
0.2801	0.3111	0.3285	0.5113	0.3441	0.432		vs.	vs.		vs.	vs.		vs.	vs.
0.2932	0.3046	0.2915	0.5611	0.3611	0.5152		Column A	DMSO		Column C	DMSO		Column E	DMSO
0.4031	0.2989	0.3505	0.4725	0.3785	0.3818
0.3651	0.3295	0.3546	0.4367	0.2773	0.5604		Unpaired t test with Welch's correction			Unpaired t test with Welch's correction			Unpaired t test with Welch's correction
0.3296	0.3364	0.3505	0.3966	0.3375	0.3767		P value	0.3753		P value	<0.0001		P value	<0.0001
0.2869	0.2836	0.2963	0.5246	0.3449	0.5446		P value summary	ns		P value summary	****		P value summary	****
0.3174	0.305	0.3034	0.4393	0.3911	0.4455		Significantly different (P < 0.05)?	No		Significantly different (P < 0.05)?	Yes		Significantly different (P < 0.05)?	Yes
0.3309	0.2599	0.3287	0.4553	0.4136	0.5083		One- or two-tailed P value?	Two-tailed		One- or two-tailed P value?	Two-tailed		One- or two-tailed P value?	Two-tailed
0.2739	0.2765	0.3942	0.4721	0.3446	0.5122		Welch-corrected t, df	t=0.9069, df=19.83		Welch-corrected t, df	t=6.794, df=20.05		Welch-corrected t, df	t=5.600, df=18.42
0.3388	0.2923	0.3437	0.4966		0.4997
0.2982	0.2872	0.4157	0.3687		0.4375		How big is the difference?			How big is the difference?			How big is the difference?
0.2799	0.3608	0.2891	0.5113		0.5451		Mean of column A	0.3164		Mean of column C	0.3372		Mean of column E	0.3547
							Mean of column B	0.3038		Mean of column D	0.4705		Mean of column F	0.4799
							Difference between means (B - A) ± SEM	-0.01261 ± 0.01390		Difference between means (D - C) ± SEM	0.1333 ± 0.01962		Difference between means (F - E) ± SEM	0.1252 ± 0.02235
							95% confidence interval	-0.04162 to 0.01641		95% confidence interval	0.09237 to 0.1742		95% confidence interval	0.07829 to 0.1721
							R squared (eta squared)	0.03982		R squared (eta squared)	0.6972		R squared (eta squared)	0.6299
							F test to compare variances			F test to compare variances			F test to compare variances
							F, DFn, Dfd	1.987, 11, 11		F, DFn, Dfd	1.907, 11, 11		F, DFn, Dfd	2.664, 11, 8
							P value	0.27		P value	0.2994		P value	0.1747
							P value summary	ns		P value summary	ns		P value summary	ns
							Significantly different (P < 0.05)?	No		Significantly different (P < 0.05)?	No		Significantly different (P < 0.05)?	No
							Data analyzed			Data analyzed			Data analyzed
							Sample size, column A	12		Sample size, column C	12		Sample size, column E	9
							Sample size, column B	12		Sample size, column D	12		Sample size, column F	12
