# Supplementary material for: Synaptic mitochondria regulate hair-cell synapse size and function
Source: eLife journal article supplement (doi:10.7554/elife.48914), 2019-10-14
Supplement: supp [file elife-48914-supp-v1.zip › elife_poa_e48914_Figure_4_figure_supplement_1_source_data_1.xlsx]

## Sheet: Figure 4-figure sup1 B
Figure 4-figure supplement 1B
Time (sec)	caax 1	caax 2	caax 3	caax 4	caax 5	caax 6	caax 7	caax 8	mito 1	mito 2	mito 3	mito 4	mito 5	mito 6	mito 7	mito 8
0	0.076514	0.13309	-0.014888	0.017239	0.071605	0.033302	0.090793	0.008689	0.093578	0.077164	0.042316	0.082226	0.085273	0.042209	0.067854	0.085836
5	0.055865	0.11746	-0.0002676	-0.0096661	0.069458	0.087342	0.11531	-0.019419	0.18073	-0.0028345	0.070765	0.096718	0.087521	0.075705	0.090325	0.085001
10	0.050246	0.089308	0.06101	-0.039741	0.039067	0.01652	0.12531	-0.014133	0.035318	-0.0014276	0.14069	0.021192	0.11758	0.031934	0.15599	0.093016
15	0.096473	0.074664	-0.0028759	0.022433	0.05675	0.064258	0.076723	-0.0061124	0.081653	0.1093	0.099237	0.070806	0.11472	0.031405	0.10382	0.019562
20	0.071615	0.10892	0.015356	0.035409	0.039365	0.027135	0.12247	0.022285	0.085797	0.09168	0.082884	-0.014219	0.015297	0.062053	0.076881	0.043726
25	0.054647	0.080411	0.0089136	0.022375	0.043644	0.029549	0.11151	0.045195	0.10316	0.10384	0.04104	0.062839	0.10032	0.030826	0.11578	0.0818
30	0.096181	0.052352	0.025451	0.01056	0.05366	0.048984	0.09605	0.067103	0.037362	0.058321	0.057487	0.014325	0.018518	0.096474	0.11943	0.099533
35	0.066442	0.031689	0.0016875	0.015009	0.021084	0.043175	0.028457	0.043505	-0.031788	0.051716	0.0084052	0.052557	0.033121	0.031874	0.036017	0.12075
40	0.026456	0.025916	0.034811	0.0094785	0.03043	0.012212	0.033576	0.073169	0.081211	0.094285	0.11637	0.041395	0.02957	0.11178	0.085888	0.067646
45	0.043138	-0.0077413	0.055176	0.049489	0.043927	0.064199	0.10696	0.01578	0.099543	0.070235	0.092629	0.075757	0.099832	0.10862	0.037272	0.12019
50	0.12566	0.040899	0.086822	0.077007	0.070406	0.025216	0.076669	0.0441	0.040971	0.064224	0.066963	0.10374	0.048987	0.073618	0.11968	0.094803
55	-0.0027123	0.0035943	0.037809	0.064655	0.08436	0.0072079	0.01452	0.018824	0.058074	0.055347	0.088487	0.065312	0.086341	0.11418	0.11583	0.073309
60	0.028853	0.045145	0.071408	0.047332	0.095677	0.0049814	0.017406	0.10925	0.076402	0.054843	0.10513	0.097442	0.073762	0.074999	0.016972	0.054701
65	0.036156	-0.023367	0.097325	0.068114	0.016803	0.021883	-0.010382	0.071814	0.050835	0.14187	0.021785	-0.0053699	0.010548	0.046031	-0.0047815	0.0092066
70	0.023712	0.07202	0.063228	0.057617	0.091438	0.059665	0.083146	0.069211	0.052926	0.099594	0.095495	0.10413	0.050064	0.030142	0.14766	0.14471
75	0.024733	0.036509	0.047699	0.046998	0.033807	0.046002	0.021006	0.082855	0.077007	0.098862	0.075895	0.085368	0.14592	0.10507	0.078814	0.1126
80	0.011456	-0.0027165	0.014171	0.082486	0.030754	0.001676	0.018014	0.091334	0.035639	0.060735	0.00507	0.049873	0.052414	0.088533	0.065272	0.12476
85	0.0037355	0.001934	0.030743	0.077319	0.047379	0.040302	0.025045	0.094132	0.00015651	0.13149	0.010334	0.033471	0.070804	0.053693	0.054425	0.059209
90	0.057468	0.0014412	0.037817	0.064044	0.031595	0.10231	-0.021196	0.10266	0.065413	0.078462	0.010484	0.056697	0.038203	0.082661	0.060278	0.032639
95	-0.023929	0.013111	0.031482	0.074135	0.066206	0.012146	-0.0087925	0.080136	0.14672	0.10712	0.038665	0.059987	0.016806	0.10899	-0.025149	0.097904
100	-0.016151	0.031146	0.05858	0.049925	0.052833	-0.01929	-0.060194	0.13368	0.002653	0.074376	0.036057	0.078953	0.060462	0.10073	0.038708	0.12308
105	0.0083676	0.03508	0.081739	0.072466	0.0082017	0.032592	-0.034895	0.12836	0.1117	0.12466	0.033374	0.051323	0.078888	0.070487	0.045001	0.074107
110	0.045768	-0.04077	0.028731	0.065491	0.05176	0.071915	0.0035168	0.10059	0.022076	0.11595	0.022117	0.089365	0.057838	0.086	-0.0086216	0.063892
115	0.0162	0.037684	0.034657	0.056406	0.060884	0.035947	0.018416	0.10649	0.014832	0.055997	0.069786	0.012362	0.076341	0.041226	0.027228	0.11703
120	0.036945	0.037881	0.057376	0.074168	0.029794	0.045833	0.046599	0.06952	0.065011	0.046468	0.13014	0.088737	0.15564	0.057668	0.12132	0.063974
125	0.029004	0.0084172	0.039338	0.057923	0.031034	0.014427	0.0061019	0.094057	0.015815	0.060903	0.047585	-0.011566	0.075227	-0.035652	0.071701	0.079731
130	0.047701	0.0020772	0.061718	0.076626	0.003523	0.027199	0.031602	0.098522	0.015525	0.075072	0.035984	0.055091	0.065957	0.023235	0.11215	0.019088
135	0.041089	0.013406	0.038787	0.034558	0.052312	0.039749	0.036026	0.086152	0.07206	0.029127	0.087933	0.038439	0.059539	0.034146	-0.0011	0.083472
140	0.060075	0.022195	0.020655	0.079069	0.0010611	0.045476	0.040343	0.062897	0.039723	0.037488	0.04559	0.055774	0.070327	0.019284	0.12184	0.013573
145	0.039623	0.057621	0.036262	0.042663	0.02974	0.023061	0.013712	0.063371	0.056289	0.058105	0.07466	0.034303	0.12551	-0.010485	0.071308	0.020495
150	0.016015	0.060852	0.031303	0.032983	0.016952	0.040999	0.019896	0.09818	0.17641	0.074895	0.06888	0.15598	0.042019	0.079584	0.085335	0.11442
155	0.062575	0.04215	0.035192	0.013781	0.0082274	0.020491	0.056679	0.080638	0.089203	0.15469	0.043697	0.081868	0.034191	0.061837	0.094749	0.0015936
160	0.049717	0.052527	0.079601	0.022997	0.031458	0.019309	0.061473	0.093845	0.050018	0.027425	0.074782	0.076746	-0.0090397	0.076534	0.11	0.080807
165	-0.0035995	0.084291	0.031296	0.0076337	0.01145	0.019934	-0.0090966	0.030763	0.017093	0.07606	0.073543	0.036655	0.048324	0.038644	0.049711	0.08736
170	-0.0078013	0.072954	0.036	0.024536	0.0058511	0.039735	0.045809	0.10975	0.049182	0.11166	0.077077	0.044116	0.083939	0.025654	0.0076838	0.20884
175	-0.025829	0.055982	0.042229	0.036195	0.062055	0.057307	0.027633	0.14917	0.051084	0.096304	-0.023629	-0.0058987	0.02026	0.056881	0.022824	0.099202
180	0.024741	0.017668	0.06476	0.058214	0.0032714	0.052653	0.03306	0.10433	-0.010714	0.10212	0.15166	0.052706	0.065536	0.048028	0.058688	0.073202
185	0.052832	0.028889	0.034081	0.032846	0.0063448	0.030236	0.023524	0.066504	0.056	0.12312	0.075685	0.096591	-0.018178	0.018534	0.069786	0.079879
190	-0.0003191	0.053285	0.058945	0.033762	-0.019568	0.0036455	-0.02431	0.098716	0.076093	0.14229	0.033544	0.037409	0.079538	0.12474	0.0043167	0.076034
195	0.01291	0.074149	0.039227	0.042979	0.015131	0.05529	0.065774	0.076185	0.084466	0.037276	0.039599	0.049199	0.0070621	0.064643	0.017576	0.047204
200	0.0098713	0.045504	0.023195	0.022996	-0.0039525	0.013107	0.040258	0.039083	0.023379	0.04856	-0.015195	0.052727	0.026288	-0.019908	0.051549	0.070181
205	0.084208	0.0073715	0.060538	0.070582	-0.0010893	0.027307	0.083794	0.12354	0.079577	0.040594	0.017497	0.068752	0.054104	0.039244	0.041037	0.081912
210	0.041454	0.064007	0.03098	0.051365	0.033299	0.035668	0.079229	0.020074	0.049764	0.06965	0.054191	0.077559	0.04596	0.010079	0.042823	0.027579
215	0.014599	0.055744	0.0012218	0.046369	0.055178	0.032637	0.025532	0.077392	0.050454	0.027289	0.014444	0.054998	0.039235	0.058894	-0.03663	-0.0081084
220	0.037093	0.044822	0.027637	0.021513	0.031086	0.024535	0.075459	0.038852	0.077877	0.068092	0.097042	0.088354	0.065254	0.049632	0.090489	0.11345
225	0.040914	0.085399	0.026553	0.040393	0.055211	0.0092244	0.03578	0.021024	0.067792	0.08294	0.064965	0.09777	0.048699	0.094571	0.050636	0.027314
230	0.060529	0.048969	0.0010517	0.0075471	0.015705	0.023455	0.067924	-0.015878	0.04094	0.16333	0.067094	0.02366	0.018563	0.04584	0.010959	0.077271
235	0.029869	0.050696	0.033721	-0.013239	0.069455	0.047998	0.079619	0.0099063	0.088974	0.08539	0.057135	0.056781	-0.012274	0.053947	0.13744	0.071823
240	0.034794	0.074719	0.01895	0.044226	0.016018	0.016551	0.10689	-0.0024535	0.13002	0.080097	0.086011	0.032053	0.087141	0.055463	0.019797	-0.029715
245	0.065792	0.049441	0.011067	-0.0007528	0.046868	0.021001	0.039785	-0.035074	0.096212	-0.018498	0.041366	0.036909	0.095212	0.051608	0.071386	0.027034
250	0.027563	0.093244	0.018112	0.013848	0.012118	0.015925	0.094116	-0.025891	0.049289	0.023346	0.026656	0.035852	0.093471	-0.017857	0.057685	-0.057773
255	0.051227	0.053783	0.010672	0.0090012	-0.0025648	0.037402	0.042914	0.018511	0.11789	0.058239	0.030999	0.04792	0.048719	0.0069967	0.013802	0.0065876
260	0.0736	0.075413	0.038611	0.016642	0.065333	0.051866	0.08826	0.050248	0.08795	0.0045778	0.078655	0.048874	0.085058	0.073521	0.094619	0.048703
265	0.095176	0.058955	0.062305	0.057487	0.016907	0.015844	0.067768	0.02609	0.063232	0.022045	0.024158	0.029496	0.051034	0.018059	0.13807	0.073702
270	0.065305	0.020089	0.031409	0.025421	0.014906	0.039782	0.071059	0.034432	0.053273	0.071058	0.082654	0.093608	0.03356	0.02006	0.024692	0.040274
275	0.081746	0.088243	0.054755	0.036066	0.047243	0.064207	0.062569	0.023386	0.069084	0.049381	0.051625	0.079535	0.06063	0.015252	0.087068	0.047291
280	0.073389	0.10427	0.032037	0.058902	0.037668	0.028382	0.10343	0.081948	0.058913	0.056778	0.12055	-0.000403	0.082892	0.089541	0.13759	0.12222
285	0.07193	0.099763	0.033358	0.01517	0.023565	0.024664	0.11358	0.065252	0.030823	0.1092	0.11514	0.10753	0.12541	0.050901	0.10017	0.097859
290	0.09147	0.057231	0.036835	0.042837	0.0044254	0.015427	0.11444	0.026474	0.10566	0.099589	0.071581	0.018741	0.056164	0.077036	0.10387	0.11563
295	0.087477	0.066249	0.067802	0.037764	0.044755	0.03129	0.11508	0.0026944	0.10624	0.019027	0.044382	0.033063	0.078356	0.017671	0.040911	0.045284
300	0.062893	0.063298	0.011855	0.029088	0.049608	0.034654	0.091524	0.019759	0.13764	0.061596	0.066566	0.15619	0.16154	0.054524	0.15143	0.074254
305	0.048947	0.1006	0.036719	-0.015248	0.032897	0.0054739	0.053999	0.023615	0.10285	0.088234	0.10864	0.047454	0.066527	0.062749	0.033446	0.034313
310	0.060491	0.061795	0.062128	0.009748	0.058648	0.047493	0.069927	0.042775	0.039237	0.093891	0.061673	0.044875	0.090013	0.067201	0.065234	0.041744
315	0.071532	0.040054	0.012556	0.0087068	0.017401	0.037931	0.047707	-0.005547	0.060818	0.11388	0.046421	0.017465	0.071628	0.066259	0.044651	0.068776
320	0.030281	0.069716	0.026448	0.008379	0.045436	0.012642	0.07778	-0.044562	0.12478	0.025612	0.010751	0.096548	0.05205	0.0018967	0.11029	0.026994
325	0.080871	0.066028	0.057265	0.053901	0.084394	0.023054	0.096678	0.024016	0.1561	0.037245	0.061584	-0.0070255	0.046628	0.09222	0.11594	0.022706
330	0.061955	0.038397	-0.002256	0.020287	0.067021	0.080002	0.060554	0.033619	0.086954	-0.033142	0.083283	0.052547	0.10286	0.047578	0.072574	0.081738
335	0.06731	0.066334	0.025419	0.040613	0.073055	0.051799	0.052216	-0.005773	0.073664	0.11643	0.046421	0.077372	0.05558	0.1298	0.15177	0.1143
340	0.040101	0.045803	0.027939	0.027025	0.078568	0.038069	0.066699	0.025969	0.14476	0.11024	0.039914	0.070684	0.10502	0.09761	0.095959	0.078847
345	0.052289	0.084853	0.052084	0.020416	0.067431	0.052075	0.066785	0.015557	0.024255	0.089594	0.11044	0.072285	0.053813	0.044785	0.17313	0.06436
350	0.050833	0.049134	-0.004008	0.00028117	0.0528	0.0069077	0.099872	0.021074	0.099295	0.038212	0.06675	0.060651	0.14754	0.10133	0.14012	0.053025
355	0.10616	0.037217	0.051764	0.069694	0.064276	0.048344	0.07082	0.09134	0.10619	0.11056	0.12196	0.11101	0.06502	0.026024	0.067968	0.089175
360	0.048305	0.069901	0.026353	0.0465	0.077548	0.04268	0.083216	0.046845	0.057313	0.036714	0.072161	-0.0070825	0.092646	0.072843	0.10521	0.12621
365	0.0808	0.01494	0.013623	0.060432	0.074231	0.045957	0.051369	0.068149	0.032264	0.011948	0.0025027	0.083029	0.07732	0.043545	0.00024644	0.0010326
370	0.075884	0.053464	0.049631	0.05949	0.085375	0.065035	0.087472	0.059273	0.040997	0.026159	-0.016005	0.10856	0.13377	0.027834	0.041275	0.037043
375	0.054785	0.044123	0.026854	0.081208	0.098748	0.055363	0.052563	0.10548	0.045914	0.055286	0.0012505	0.10948	0.056363	0.079609	0.056282	0.09807
380	0.0085621	0.055482	0.036739	0.062849	0.096723	0.066114	0.049594	0.052962	0.034598	-0.023215	0.055435	0.067274	0.1519	0.068268	0.055436	0.086212
385	0.011045	-0.019404	0.011858	0.065215	0.095968	0.047225	0.056392	0.062882	0.046788	0.10842	0.023542	0.020647	0.1809	0.12108	0.036125	0.092628
390	0.041452	0.030872	-0.0060015	0.034884	0.073081	0.018039	0.055279	0.040037	-0.0048111	0.12146	0.005598	0.041394	0.092903	0.074012	0.08136	0.12593
395	0.038341	0.011677	0.010701	0.078006	0.087018	0.0070843	0.032238	0.089904	0.08014	0.029768	0.11827	0.075735	0.10085	0.14949	0.072753	0.15384
400	0.029481	0.034365	0.024977	0.03791	0.084796	0.020175	-0.019558	0.028728	0.0922	0.1609	0.065029	0.085876	0.0094898	0.092538	0.079761	0.10818
405	0.015658	0.036233	0.012573	0.066692	0.089753	-0.018847	0.040086	0.06777	-0.016256	0.0077539	0.05042	0.066798	-0.014087	-0.0076761	-0.0052475	-0.027762
410	-0.0095954	0.048146	0.013713	0.071928	0.054951	0.005863	0.040793	0.058188	-0.056528	0.086558	0.063432	0.023048	0.11955	0.044146	-0.0050889	0.12251
415	0.05354	0.061278	0.048106	0.054942	0.042163	0.047131	0.028936	0.10201	0.011144	-0.0063102	0.04046	0.096375	0.051007	0.026738	0.041925	0.084562
420	0.056609	0.013204	0.075045	0.031724	0.058104	0.056392	0.072403	0.026976	0.083435	0.09246	0.049248	0.047398	0.075727	0.11662	0.096685	0.11717
425	0.052663	0.044099	0.043904	0.054918	0.030886	0.029458	0.032691	0.097934	0.029505	0.088705	0.10357	0.048221	0.013083	0.11295	0.022405	0.12678
430	-0.013803	0.034872	0.052037	0.050625	0.032294	0.060592	0.027691	0.025845	0.086862	0.04714	0.089019	0.11392	0.037217	0.029689	0.042458	0.01573
435	0.0039051	0.0014823	0.00015128	0.026672	0.045238	0.060035	0.065692	0.11822	0.043344	0.10089	-0.016618	0.098414	0.10805	0.053288	0.0168	0.084895
440	0.014733	-0.0045865	0.033799	0.028992	0.024559	0.036234	0.012642	0.085458	0.016814	0.038622	-0.0035596	0.042211	0.0016635	0.029607	0.078038	0.04707
445	0.045431	0.042479	0.048204	0.047267	0.03605	0.048808	0.013878	0.078034	0.1032	0.01017	0.040462	0.03525	0.030263	0.012575	0.010105	0.073838
450	0.0448	-0.0072349	3e-05	0.011252	0.073288	0.050339	0.073854	0.060834	0.02001	0.040013	0.030664	0.027595	0.1032	0.053392	0.070949	0.10329
455	0.020075	-0.018552	0.022073	0.04524	0.02709	0.074591	0.018238	0.13143	0.01071	0.053097	0.070804	0.0044768	0.056135	0.09024	0.089776	0.070277
460	0.051397	0.0069467	0.010365	0.045983	0.10243	0.050726	0.068917	0.12869	0.074577	0.092544	0.1089	0.11358	0.10354	0.14132	0.19143	0.17438
465	0.045873	0.0079613	0.087381	0.039115	0.094098	-0.0082648	0.027664	0.058385	-0.037095	0.089017	-0.0092046	0.010678	-0.015903	0.029226	0.016568	0.063311
470	0.052627	0.025348	0.020111	0.081351	0.022722	-0.017253	0.055416	0.076964	0.098715	0.061899	0.025823	0.086194	0.10792	0.047192	0.029495	0.039661
475	0.078954	0.042828	0.045106	0.08865	0.066324	0.049388	0.095024	0.092542	0.097512	0.00055055	0.025433	0.10203	0.065823	0.096345	0.080342	0.10926
480	0.066093	0.025472	0.034326	0.11384	0.071448	0.040306	0.073476	0.05121	0.051167	0.079503	0.089096	0.09397	0.049269	0.075257	0.12869	0.15628
485	0.071296	0.050731	0.037803	0.090759	0.059002	-0.011064	0.10726	0.0597	0.054695	0.069737	0.079125	0.057889	0.072083	0.07557	0.07377	0.070249
490	0.086541	0.03353	0.054977	0.045421	0.034949	-0.0016065	0.098296	0.055768	-0.014821	0.14963	0.037044	0.061199	0.00047246	0.0076738	0.012791	0.11301
495	0.060751	0.032346	0.023882	0.087827	0.063694	0.01154	0.10649	0.05936	0.0037246	0.045625	0.070652	0.018274	0.052102	-0.035011	0.010388	0.073788
500	0.053757	0.039677	0.039564	0.060401	0.063861	0.007423	0.036976	0.049723	0.046088	0.10395	0.11225	0.047161	0.064928	0.10609	-0.027475	0.10717
505	0.021501	0.025079	0.016589	0.013511	0.011723	0.038252	0.0035231	0.031538	0.12163	0.085872	0.0074209	0.041254	0.077228	0.018862	0.19914	0.065253
510	0.05965	0.05202	0.028645	0.055106	0.043896	-0.01453	0.020283	0.039895	-0.0008972	0.12081	-0.019574	0.034056	0.018201	0.012422	0.041071	0.095168
515	0.065037	0.017627	0.048589	0.059267	0.059985	0.067723	0.0023467	0.087116	0.12563	0.14261	0.087981	0.078614	0.033964	0.058741	0.16241	0.095841
520	0.023319	0.054937	0.083916	0.06153	0.030547	0.024815	0.05493	0.065333	0.074161	0.13904	0.058389	0.068547	0.13349	0.078304	0.040945	0.092397
525	0.051011	0.096565	0.065749	0.057691	0.0001364	0.0041316	0.021372	0.05461	0.064031	0.10728	0.083793	0.045588	0.031738	0.11013	0.058009	0.13109
530	0.016107	0.081164	0.060007	-0.0031136	0.051332	0.023233	0.032743	0.076192	0.10605	0.041026	0.14047	0.085414	0.10656	0.10117	0.11334	0.14025
535	-0.0097085	0.037057	0.031062	0.037874	0.032381	0.04566	0.031177	0.068107	0.019623	0.098016	0.046013	0.043928	0.15155	0.064774	0.052595	0.1071
540	0.023467	0.090231	0.075285	0.031507	0.037435	0.040336	0.028645	0.08456	0.11229	0.076474	0.065427	0.066953	0.049754	0.030698	0.10211	-0.015869
545	0.018343	0.10578	0.069846	0.03845	0.048452	0.038624	0.041883	0.053175	0.1225	0.07111	0.13445	0.029154	-0.0096658	0.031902	0.091346	0.083315
550	0.035832	0.096627	0.027588	0.010908	0.051841	0.028598	0.036966	0.06303	0.12595	0.080288	0.034667	0.078986	0.12858	0.035118	0.027793	0.049285
555	0.031211	0.035696	0.034517	0.030361	-0.011644	0.057876	0.071052	0.019119	0.017697	0.1439	0.055078	0.043256	0.048985	0.040162	0.017948	0.08389
560	0.063459	0.042077	0.056973	0.0050604	0.011826	0.075684	0.050364	0.040506	0.09906	0.064645	0.020093	0.032484	-0.041216	0.10876	0.074831	0.051163
565	0.026954	0.065069	0.044331	0.010776	0.03909	0.039438	0.068572	0.048856	0.02901	0.022991	0.067396	0.058484	0.11558	0.04439	0.13519	0.051113
570	0.0763	0.035956	0.052158	0.060502	0.034627	0.020528	0.034778	0.014868	0.061998	-0.031567	0.053263	0.065356	0.026274	-0.0015691	0.10106	0.083611
575	0.068087	0.047597	0.03731	0.068832	0.041376	0.079706	0.038684	0.0541	0.12777	0.087236	0.060184	0.087241	0.054589	0.061725	0.072632	0.070606
580	0.052941	0.032106	0.0016087	0.036542	0.030264	0.0024745	0.045333	0.090502	0.023181	0.034838	0.123	0.068141	0.029723	0.047617	0.045171	0.010129
585	0.035613	0.042092	0.045867	0.034004	0.085863	0.043319	0.01893	0.10302	0.10313	0.089762	0.026182	0.037402	0.0046141	0.033654	0.089206	0.080107
590	0.033719	0.039526	0.024519	0.038306	0.00067427	0.036063	0.031679	0.041786	0.081159	0.081769	0.08977	0.073302	0.13722	0.088199	0.035823	0.13661
595	0.029397	0.027452	0.071856	0.011763	0.081809	0.057368	0.060763	0.072793	0.052083	0.035413	0.072086	0.049605	0.12023	0.069589	0.013175	0.16602
600	0.044024	0.029208	0.067021	0.040711	0.033398	0.039657	0.015068	0.06377	0.12296	0.11082	0.10734	0.03295	0.076415	0.07341	0.10328	0.058811
605	0.056788	0.016062	0.022697	0.051569	-0.012773	0.021459	0.011567	0.095732	0.085421	0.094422	0.13883	0.093515	0.11097	0.13755	0.13087	0.10167
610	0.031083	0.062242	0.058274	0.017608	0.06624	0.019267	0.051091	0.078217	0.12722	0.081674	0.070527	0.122	-0.0030852	0.047479	0.0345	0.061019
615	0.0031823	0.031951	0.06389	0.024957	0.089874	0.024124	0.04057	0.030709	-0.0068108	0.090956	0.12389	0.10251	0.061684	0.11136	0.011066	0.0039239
620	-0.033266	0.066683	0.021758	0.065454	0.050249	0.044661	0.083514	0.079709	0.11762	0.16391	0.084386	0.067726	0.0036413	0.065876	0.031617	0.07914
625	0.035243	0.040364	0.068662	0.079314	0.035889	0.079114	0.034174	0.096338	0.031392	-0.015138	0.018165	0.05825	-0.0049435	0.024194	0.14508	0.085854
630	0.010203	0.099759	0.048852	0.0075087	0.01956	0.044048	0.067319	0.071079	0.11987	0.093518	-0.00088	0.089807	0.046455	0.077604	0.19162	0.11571
635	0.0042028	0.064302	-0.020631	0.015879	0.019191	0.02788	0.0073048	0.045873	0.012645	0.081624	0.091179	0.037132	0.11149	0.071674	0.045664	0.058221
640	0.023939	0.060846	0.062668	0.0029042	0.03396	0.04278	-0.0049623	0.0461	0.099683	0.091956	0.1124	-0.010958	0.12412	-0.0037427	0.002162	0.015391
645	0.046021	0.06222	0.079865	0.040631	0.017498	0.054362	0.06989	0.048416	0.059102	0.086835	0.068791	0.055052	0.046828	0.044134	0.087451	0.0031636
650	-0.0017326	0.026611	0.013149	0.0046816	0.011	0.027497	0.026514	0.024953	0.058883	0.0088024	-0.016163	0.085261	0.050172	-0.0030283	0.15518	-0.042482
655	0.027913	0.11191	0.070571	0.054268	0.017308	0.019556	0.019366	0.091054	0.051694	0.10914	0.109	0.053953	0.10884	0.091886	0.14175	0.10787
660	0.054724	0.083979	0.050658	0.070716	0.044162	0.025713	0.034753	0.084717	0.039101	0.036854	0.10518	-0.053342	0.023873	0.00011398	-0.014112	0.065709
665	0.036416	0.043311	0.02646	0.025786	-0.028064	0.034783	0.11804	0.080644	0.071553	0.084393	0.065601	0.045327	0.018974	0.086304	0.084602	0.092637
670	0.10204	0.0076883	0.055898	0.037938	-0.019429	0.076344	0.044111	0.086262	0.14556	0.045017	0.090966	-0.013687	0.10066	0.018756	0.059296	0.1019
675	0.058824	0.10968	0.039306	0.021228	0.011998	0.022548	0.076063	0.10006	0.11522	0.097265	0.079378	-0.0083802	0.084698	-0.019206	0.064758	0.061865
680	0.045997	0.060434	0.024787	-0.014424	0.028648	0.043586	0.062093	0.054489	0.11069	0.13934	0.091744	0.052525	0.10267	0.094046	0.047831	0.083185
685	0.045215	0.012775	0.028708	0.010593	0.030488	0.028988	0.088048	0.045123	0.028294	-0.024803	0.071126	-0.026335	0.010941	0.039066	0.058757	0.051664
690	0.037088	0.021169	-0.0035835	0.031256	0.02543	0.066747	-0.0018075	0.063071	0.043588	0.12011	0.074426	0.13315	0.054457	0.1271	0.14424	0.09354
695	0.061805	0.025591	0.0015851	0.02406	0.025554	0.025019	0.01404	-0.025273	0.0271	0.083984	0.070911	0.074255	0.063864	0.11299	0.0067084	0.024335
700	0.031675	0.033483	-0.0008538	-0.0081247	-2.13e-05	0.036082	0.0048994	0.031682	0.048841	0.12281	0.07361	0.040021	0.052139	0.08048	0.071703	0.1284
705	0.040829	0.0095107	-0.0022994	0.0048637	0.023034	0.017231	0.030166	0.018708	0.048641	0.089811	0.057351	0.011435	0.024772	-0.0017153	0.093833	0.046149
710	0.041043	0.063576	0.0083318	0.032876	0.02531	0.015763	0.044768	0.0014704	0.065924	0.08056	0.054479	0.05758	0.084912	0.082423	0.0027408	0.11386
715	0.072151	0.025609	0.056791	-2.96e-05	-0.0059182	0.019233	0.048573	0.069864	0.051438	0.14605	0.059721	0.010993	0.037575	0.088794	0.12422	0.071318
720	0.052403	0.062776	0.025449	0.021895	0.0032832	0.052031	0.063799	0.031216	0.084269	0.10838	0.12239	0.10006	0.10814	0.078408	0.095243	0.12715
725	0.027725	0.094142	0.021898	0.015307	0.018465	0.029954	0.025855	0.028175	0.09208	0.18515	0.047787	0.07853	0.085402	0.1424	0.08464	0.013411
730	0.037472	0.058287	0.014789	-0.002769	0.044979	0.061692	0.092503	0.031994	0.12688	0.1601	0.0028414	0.088347	0.091763	0.083253	0.029737	0.044482
735	0.047098	0.059039	0.014454	0.0042165	0.0020288	0.027304	0.034404	0.010882	0.047521	0.085209	0.10908	0.037082	0.10676	0.079316	0.059972	0.020631
740	0.052281	0.03977	0.019048	0.001475	0.020573	0.022515	0.072721	0.012139	0.10203	0.089919	0.065774	0.04174	0.057645	0.011123	0.043982	-0.044446
745	0.056982	0.073342	0.028914	0.057872	0.053196	0.066822	0.13673	0.012259	0.04782	0.032031	0.073247	0.0058598	-0.0065784	0.011268	0.039375	0.06367
750	0.058735	0.063659	-0.028559	0.00579	0.060699	0.073554	0.034929	0.086459	0.11846	0.07528	0.080711	0.10541	0.055565	0.073355	0.09742	0.041272
755	0.04952	0.045815	0.009467	0.0098323	0.065027	0.070765	0.030584	0.089563	0.017298	0.092891	0.040561	0.068498	0.15061	0.032345	0.089749	0.067297
760	0.060818	0.052993	0.012811	0.040438	0.04567	0.0039647	0.045011	0.045756	0.086948	0.12721	0.045521	0.0024643	0.073966	0.04613	0.061634	0.093269
765	0.071467	0.082828	0.099861	0.069818	0.054063	0.016425	0.085751	0.094336	0.032738	0.059769	0.073952	0.065378	0.04532	0.045068	0.14112	0.19987
770	0.056639	0.082512	0.05686	0.02757	0.025425	0.057608	0.032678	0.069876	0.016773	0.015307	-0.024408	0.067253	0.063976	0.071803	0.02057	0.12792
775	0.055294	0.073687	0.07441	0.053613	0.058578	0.046371	0.060176	0.08367	0.051634	0.028312	0.01966	0.076729	0.042189	0.075367	0.076145	0.14024
780	0.057867	0.014513	0.035902	0.070002	0.065169	0.012479	0.11011	0.091763	0.10105	0.044831	0.057539	0.030367	-0.03722	0.056247	0.12453	0.0068886
785	0.04271	-0.0047526	0.047721	0.067016	0.032403	0.037485	0.072224	0.035885	-0.017915	0.00053749	0.08134	0.12282	0.099594	0.037733	0.028418	0.089849
790	0.06088	0.024572	0.045543	0.063662	0.056955	0.030418	0.058098	0.073872	0.056776	0.048062	0.019155	0.062391	0.068016	0.055086	0.081372	0.035922
795	0.04682	0.038935	0.032383	0.068784	0.040596	0.026416	0.042744	0.020856	0.14863	0.0038859	0.074432	0.084624	0.015391	0.029785	0.077538	-0.028286
800	0.029491	0.050931	0.060186	0.072782	0.070699	0.049726	0.056482	0.055618	0.067644	0.0088007	0.01239	0.11027	0.075117	0.094084	0.069838	0.092141
805	0.039765	0.068234	-0.0024844	0.016668	0.059674	-0.021275	0.035338	0.04051	0.026419	0.044612	0.00881	0.088406	0.052333	0.096741	0.12387	0.10967
810	0.035918	0.04007	0.058984	0.067341	0.061666	0.023533	0.082883	0.072087	0.091186	0.11766	0.10213	0.095313	0.16716	0.11276	0.14383	0.096963
815	0.018013	0.043625	0.043664	0.056184	0.094383	0.02283	0.054548	0.053338	0.043381	0.11218	0.062044	0.10025	0.071908	0.035163	0.0066143	0.072906
820	0.03168	0.037484	0.03355	0.069643	0.088835	0.04662	0.067256	0.11286	-0.0027065	-0.012335	0.030263	0.047405	0.063428	0.053669	0.0017211	0.029047
825	0.038454	0.052977	0.069195	0.068466	0.0373	-0.0025526	0.070334	0.034905	0.010763	0.10173	0.14007	0.036482	0.0078988	-0.0077532	0.010812	0.076302
830	0.058644	0.024981	0.05551	0.10519	0.089579	0.074416	0.053072	0.075973	0.016702	0.056306	-0.0057717	-0.027695	0.064292	0.0011844	-0.013655	0.067984
835	0.021372	0.027109	0.042351	0.061348	0.056819	-0.0037517	0.021803	0.074013	0.1157	0.16838	0.015045	0.097123	0.17696	0.061959	0.064976	0.090467
840	0.018181	-0.0079873	0.01363	0.025067	0.019231	0.03468	0.018814	0.00094998	0.094268	-0.042245	0.026466	0.04039	0.059618	0.040462	0.092087	0.035986
845	0.069869	0.043687	0.023425	0.028673	0.065578	0.028089	0.0436	0.080257	0.075003	0.04982	0.073323	0.075819	0.04304	0.052439	0.053953	0.13616

## Sheet: Figure 4-figure sup1 C
Figure 4-figure supplement 1C
	caax 1	caax 2	caax 3	caax 4	caax 5	caax 6	caax 7	caax 8
mito 1	0.102516	0.263487	-0.0165151	-0.198277	-0.0622591	0.154682	0.123839	-0.160916
mito 2	-0.132177	0.000407633	0.00375914	-0.077402	-0.179055	-0.11661	-0.183065	0.0804609
mito 3	0.0870322	0.203151	0.110355	-0.0843883	-0.0619197	-0.0635063	0.129302	-0.0678821
mito 4	-0.025677	0.022236	-0.0558122	0.0563902	0.170214	0.0978742	-0.014992	0.0225084
mito 5	-0.0554484	0.0497938	-0.157594	-0.0610123	0.0851954	0.0822848	0.0572948	-0.0600071
mito 6	-0.0907311	-0.0846132	-0.0499021	-0.00494836	0.135024	0.0428989	-0.120296	0.119406
mito 7	0.210124	0.15648	0.0222674	-0.159852	-0.0098407	0.112097	0.186741	-0.0961006
mito 8	-0.00441035	0.00276656	0.117901	0.135384	0.127318	0.0497516	-0.00247072	0.293033
