# Supplementary material for: Synaptic mitochondria regulate hair-cell synapse size and function
Source: eLife journal article supplement (doi:10.7554/elife.48914), 2019-10-14
Supplement: supp [file elife-48914-supp-v1.zip › elife_poa_e48914_Figure_4_source_data_1.xlsx]

## Sheet: Figure 4A''
Figure 4A'''
	caax 1	caax 2	caax 3	caax 4	caax 5	caax 6	caax 7	caax 8	caax 9	caax 10	caax 11	caax 12
mito 1	0.197085	0.15197	0.153778	0.118692	0.00604944	-0.0263098	0.137414	0.0609353	0.119402	-0.000891797	-0.0435564	0.0317568
mito 2	0.117797	0.510943	0.209643	0.180259	0.169065	0.061903	0.262453	0.239363	-0.104308	0.0823878	0.174884	0.24599
mito 3	-0.225533	0.251124	0.618149	0.335029	0.207211	0.0811702	0.337889	0.183283	-0.192674	0.0309623	0.142531	0.401087
mito 4	-0.277328	0.173227	0.332158	0.429007	0.14519	-0.0452522	0.15896	0.0099407	-0.209887	-0.100327	-0.0626882	0.163031
mito 5	-0.0264813	0.0912346	0.0811281	0.172173	0.803411	0.0214381	0.155197	0.0436426	-0.0216468	-0.241183	-0.261014	0.135787
mito 6	0.0187311	0.105456	-0.0793013	0.202273	0.109448	0.824908	0.586352	-0.109039	0.0366096	0.093471	0.170339	0.346049
mito 7	0.082886	0.187172	0.0250859	0.273817	0.121117	0.492275	0.596714	-0.0367003	0.166424	0.228228	0.310873	0.279241
mito 8	0.127155	0.402463	0.441266	0.135144	0.189803	0.0248951	0.265867	0.435756	0.0704417	-0.0528817	0.161212	0.140143
mito 9	0.346723	0.0649344	0.129101	-0.0114165	-0.0668885	0.0888061	0.226516	0.22613	0.638514	-0.0455146	0.152736	-0.174684
mito 10	-0.293976	-0.033379	-0.378221	0.127735	-0.0726723	0.452328	0.451412	-0.12812	0.0359826	0.785425	0.382204	0.111859
mito 11	-0.0112526	0.343809	0.182656	0.23249	0.0493271	0.341806	0.681634	0.237369	0.100539	0.255688	0.667422	0.406483
mito 12	-0.097798	0.283373	0.19281	0.0419432	0.0596119	0.22717	0.227316	0.0187613	-0.337254	-0.00707665	0.1704	0.636916

## Sheet: Figure 4Aiii
Figure 4A'''
plotted in Figure 4A'''
3 dpf spontaneous GCaMP6sCAAX;mitoRGECO dF/F (F = 0.15 of intensity range for caax, 0.21 of intensity range for mito)
Time (s)	caax 1	caax 2	caax 3	caax 4	caax 5	caax 6	caax 7	caax 8	caax 9	caax 10	caax 11	caax 12	mito 1	mito 2	mito 3	mito 4	mito 5	mito 6	mito 7	mito 8	mito 9	mito 10	mito 11	mito 12
0	0.11032	0.20735	0.39445	0.11984	0.56136	0.81139	0.18955	0.50064	0.96339	0.57425	0.579	1.5367	0.17457	0.15341	0.21457	0.15696	0.23092	0.43479	0.14813	0.097295	0.16741	0.46925	0.34073	0.20048
5	0.067214	0.24965	0.37539	0.12496	0.48712	0.98145	0.1692	0.26102	0.97434	0.42209	0.42871	1.7703	0.10129	0.12925	0.28806	0.17901	0.16793	0.56751	0.11648	0.14853	0.23202	0.42296	0.28477	0.18855
10	0.083184	0.36464	0.2987	0.085351	0.66229	1.1376	0.11505	0.1354	0.67409	0.36161	0.48269	1.5266	0.081326	0.29734	0.25217	0.12564	0.18285	0.62545	0.14146	0.17338	0.19293	0.32855	0.27581	0.25768
15	0.2572	0.55551	0.15138	0.12056	0.84908	1.2278	0.16331	0.25897	0.56238	0.39055	0.6229	1.5421	0.09384	0.22155	0.10662	0.11659	0.18044	0.7466	0.1343	0.11224	0.071584	0.32825	0.24293	0.15781
20	0.052776	0.19895	0.13364	0.061462	0.60363	1.0713	0.15201	0.15303	0.35541	0.39157	0.51583	1.8225	0.071623	0.15242	0.14188	0.12309	0.19292	0.61015	0.14857	0.059307	0.0067184	0.3174	0.30461	0.13515
25	0.043513	0.26611	0.063985	0.0055381	0.50789	1.1253	0.13844	0.10801	0.61274	0.23387	0.38791	1.2643	0.12724	0.1162	0.12806	0.081338	0.27222	0.77622	0.1161	0.10541	0.18194	0.19369	0.32067	0.15103
30	0.031763	0.34434	0.079178	0.036501	0.74645	1.1754	0.10069	0.22507	0.37195	0.31413	0.45934	1.5553	-0.013748	0.072479	0.16432	0.082709	0.25577	0.62279	0.050868	0.062738	0.054937	0.20146	0.19735	0.15946
35	0.074699	0.42819	0.11687	0.10531	0.85169	1.1439	0.20626	0.30561	0.84654	0.27523	0.32059	1.8458	0.078495	0.24443	0.1799	0.11725	0.25729	0.80451	0.17477	0.01066	0.12061	0.13431	0.4089	0.17328
40	0.12886	0.39778	0.13079	0.094296	0.61459	0.69956	0.071039	0.28999	0.69073	0.23987	0.21342	1.1643	0.084984	0.10772	0.095858	0.020976	0.24229	0.59103	0.13929	0.055098	0.031288	0.20785	0.27433	0.2467
45	0.25095	0.46236	0.21343	0.113	0.64487	0.21386	0.04401	0.2912	0.85511	0.26408	0.17738	0.6708	0.049767	0.15529	0.10454	0.044329	0.25139	0.40716	0.12119	0.061546	0.15472	0.25061	0.18998	0.17771
50	0.082085	0.42304	0.25675	0.077802	0.4209	0.093924	0.057759	0.31985	0.76103	0.20029	0.24751	0.6491	0.076245	0.081219	0.1017	0.096927	0.18985	0.24496	0.031635	0.10949	0.11234	0.082336	0.19154	0.16293
55	0.18672	0.31238	0.23254	0.06062	0.27443	-0.18139	0.034578	0.13822	0.57019	0.25945	0.22617	0.69315	0.17116	0.22132	0.10116	0.06087	0.26815	0.17214	0.006055	0.095959	0.054038	0.20175	0.17	0.20531
60	0.17718	0.24147	0.23598	0.056149	0.29446	0.14253	0.04563	0.28666	0.65745	0.39059	0.22947	0.82186	0.059112	0.24991	0.16552	0.070977	0.22379	0.074069	0.015083	0.099651	0.093473	0.13347	0.09068	0.091805
65	0.091568	0.11439	0.23785	0.054469	0.34592	0.40189	0.06477	0.38875	0.54405	0.40521	0.21708	0.67773	0.01056	0.071415	0.13855	0.0082982	0.16401	0.15536	0.019927	0.028724	0.07544	0.13657	0.085882	0.063048
70	0.076604	0.16732	0.1951	0.036604	0.50721	0.28119	0.028554	0.37546	0.62225	0.47626	0.11923	0.57338	0.07918	0.12774	0.1931	0.076152	0.13285	0.11559	0.025213	0.1257	0.014311	0.18615	0.022349	0.10688
75	-0.0032847	0.038981	0.21301	0.045937	0.40036	0.13975	0.026874	0.26307	0.49568	0.37705	0.11617	0.60008	0.088743	0.1554	0.18008	0.037242	0.1571	0.060549	0.019115	0.06099	0.057004	0.22989	0.057355	0.12707
80	-0.017955	-0.090006	0.11071	0.0056552	0.24775	0.27556	0.039349	0.012175	0.61569	0.42361	0.11544	0.5837	0.031825	0.0046395	0.16055	0.021762	0.10491	0.10836	0.10138	0.0079529	0.052097	0.174	-0.0095256	0.010576
85	-0.022838	-0.090632	0.12098	9.68e-05	0.30713	0.90953	0.060829	0.026411	0.42896	0.53022	0.20281	0.67851	0.048777	-0.030091	0.095454	0.070597	0.084911	0.29639	0.033023	0.070714	0.081799	0.23451	0.12377	0.044646
90	-0.08532	0.030596	0.18676	0.065572	0.28752	0.8757	0.06509	0.1949	0.21071	0.55309	0.23126	0.65568	0.036432	0.047152	0.15521	0.073022	0.12404	0.44178	0.022176	-0.00714	0.016007	0.27606	0.11253	0.13854
95	-0.0235	-0.055703	0.1451	0.037532	0.20114	0.6132	0.066652	0.22093	0.59176	0.48885	0.32795	0.35661	-0.029801	0.08258	0.092841	0.058338	0.16724	0.49313	-0.0069275	0.046831	0.087464	0.39955	0.095424	0.069427
100	-0.059905	-0.020167	0.18911	0.042391	0.17566	0.7996	0.03968	0.0075536	0.55643	0.50108	0.30668	0.2574	0.030494	0.068567	0.14115	0.088481	0.12088	0.26676	0.085405	0.091084	0.087276	0.28927	0.071688	0.1592
105	0.011174	-0.12591	0.21307	0.036986	0.13951	0.83665	0.028503	0.042207	0.63363	0.45152	0.38594	0.27403	0.070255	0.010344	0.10113	0.03806	0.1306	0.45018	0.071893	0.055489	0.02081	0.28419	0.10566	0.088813
110	0.0086974	-0.13278	0.13441	0.053392	0.20801	0.4503	0.030905	-0.0009329	0.99535	0.32077	0.34525	0.257	-0.024446	-0.065096	0.19538	0.019592	0.16056	0.27036	0.055246	0.061701	0.11033	0.29549	0.1405	0.12858
115	-0.029762	-0.059704	0.1213	0.019998	0.30647	0.19019	0.023345	0.0084261	1.6945	0.18628	0.24736	0.087258	-0.016104	0.043015	0.093363	0.071267	0.16711	0.18696	0.057102	0.034738	0.22016	0.24266	0.084475	0.13365
120	0.027753	-0.027132	0.080243	0.032965	0.17433	0.47734	0.035772	0.041177	1.6099	0.23963	0.32305	0.189	0.080633	-0.036721	0.101	0.081044	0.12604	0.15621	0.045968	0.05854	0.28257	0.17945	0.092248	0.087486
125	0.048564	-0.0054066	0.11141	0.044876	0.16674	0.26238	0.033382	0.059869	0.80048	0.39316	0.30452	0.35812	0.023124	0.057763	0.09102	0.11256	0.17311	0.22688	0.017186	-0.018207	0.17159	0.16881	0.084322	0.061077
130	0.052641	-0.040367	0.08306	0.065067	0.14337	0.086301	0.047916	0.0027014	0.90298	0.45759	0.2598	0.30345	0.086158	-0.012085	0.0099774	0.053648	0.15224	0.12255	0.050333	-0.042524	0.16386	0.24967	0.055859	0.068028
135	0.042923	0.081717	0.05981	0.067198	0.27151	0.26438	0.028962	-0.051781	0.60036	0.60186	0.11751	0.40478	0.059708	-0.04229	0.092966	0.087089	0.06361	0.080658	0.059677	0.020379	0.079298	0.34597	0.077276	0.019648
140	0.092983	0.109	0.059037	0.052462	0.22241	0.1512	0.035794	-0.0078594	0.34589	0.60907	0.08331	0.56775	0.10836	-0.01377	0.0018913	0.070225	0.14033	0.0093108	-0.010885	0.022095	0.04857	0.29626	-0.0069921	0.01723
145	0.032228	0.053546	-0.02536	0.017011	0.22548	0.13408	-0.0080499	0.048709	0.40564	0.643	0.11117	0.48106	-0.0093168	0.0077352	0.0084848	0.03016	0.17551	-0.20273	-0.015803	0.003799	0.06989	0.50068	0.0036747	0.12035
150	0.013939	0.022871	-0.032858	0.026624	0.17411	-0.040035	-0.0095505	0.097213	0.60722	0.55309	0.11058	0.26684	0.053132	0.018725	-0.026763	0.052962	0.1296	-0.091861	0.024056	0.093412	0.14304	0.42247	0.017325	0.026018
155	-0.001983	0.087152	-0.063672	-0.0074065	0.1254	0.16547	0.0079726	0.20544	0.94826	0.40304	0.10296	0.21769	0.11669	0.033265	-0.044649	0.042475	0.088897	-0.09255	0.028377	0.010075	0.16011	0.40801	-0.058434	0.10937
160	0.056483	0.10946	-0.04005	0.028207	0.13211	0.12298	-0.012805	0.10245	0.3674	0.28177	0.19284	-0.014017	0.13619	0.032644	0.0050861	0.081638	0.15437	-0.070684	0.0042507	-0.014628	0.10283	0.36251	-0.047509	0.017005
165	0.053578	0.018455	-0.042093	-0.017127	0.19477	0.33284	0.0046447	-0.012983	0.46076	0.27868	0.084318	0.04198	0.030509	-0.07732	-0.084528	0.04993	0.1613	0.018016	-0.047218	0.040311	-0.0005893	0.29922	0.021499	0.038692
170	0.18773	0.028776	-0.088846	0.0003765	0.27068	0.44655	-0.028521	-0.035831	0.47698	0.11029	0.086086	-0.093062	0.12821	0.040198	-0.041672	-0.0065046	0.14074	0.10564	0.040022	0.0035289	0.069087	0.29759	0.031505	0.051845
175	0.20141	0.01723	-0.035656	-0.012583	0.26347	0.66106	-0.0094377	0.0067065	0.036557	-0.0050276	0.052191	0.14853	0.10656	0.052162	-0.10564	-0.050521	0.1302	0.1864	-0.02105	0.023913	-0.0014349	0.15337	-0.019103	0.035409
180	0.22953	0.099446	-0.017219	0.034251	0.26065	0.76091	0.014324	0.026253	-0.31421	-0.069797	-0.026916	0.13841	0.0054835	0.029274	-0.07086	-0.027997	0.11856	0.4706	0.028215	0.084076	0.11056	0.10292	0.026045	-0.010953
185	0.17252	0.12207	0.015094	0.027511	0.22774	0.59891	0.0014261	0.010062	-0.20319	0.028647	0.17888	0.30825	0.041936	0.04899	-0.0031424	0.022963	0.16487	0.29902	-0.0007547	0.013014	-0.027977	0.020317	0.0011393	0.044691
190	0.10257	0.15596	0.070746	0.039319	0.24589	0.78367	0.033431	0.089658	1.6207	0.079042	0.14387	0.17893	0.037626	0.043853	-0.025334	0.04973	0.18441	0.43175	0.056186	-0.026727	0.080767	-0.002458	0.10632	0.028621
195	0.1742	0.15662	0.059965	0.047503	0.23079	0.41122	0.013108	0.10607	1.8122	0.02703	0.0020792	0.27957	0.12246	0.061247	0.049227	0.039081	0.15704	0.48753	0.080565	0.065929	0.24819	0.099035	0.061651	0.057779
200	0.18036	0.099865	0.071214	0.080566	0.20603	0.35441	0.027599	0.064299	1.5948	0.011562	-0.10255	0.15402	0.045293	0.0095798	0.033645	0.037593	0.1374	0.26723	0.024326	0.06519	0.17254	-0.062976	-0.010523	-0.024086
205	0.17001	0.17908	0.032401	0.05368	0.19824	0.62011	-0.016326	0.13297	1.2741	0.12022	0.0041985	0.1032	0.18276	0.10531	-0.01158	0.05082	0.10754	0.35885	0.026257	0.060463	0.20254	0.10239	-0.061498	0.0078927
210	0.17183	0.19718	0.10609	0.065833	0.33757	0.10087	0.009029	0.20849	2.0113	0.1074	-0.032602	-0.31502	0.026212	0.011115	0.066074	0.010268	0.23068	0.23449	0.019696	0.046598	0.22688	-0.026843	-0.099202	-0.033263
215	0.18744	0.20419	0.12574	0.092748	0.3037	0.11165	0.012874	0.22569	1.8962	0.03744	0.077885	-0.17321	0.051383	0.079091	0.025644	0.077185	0.15666	0.18911	0.051899	0.074861	0.22161	-0.054429	-0.026514	-0.0086813
220	0.16315	0.13566	0.17254	0.038237	0.31219	0.31355	-0.0050756	0.35004	1.8423	-0.0066324	0.22107	-0.20782	0.08819	0.054745	0.041516	0.07516	0.14844	0.21633	-0.0083341	0.0017169	0.32087	-0.037724	-0.05218	0.030109
225	0.2457	0.20246	0.17395	0.04924	0.26777	0.22629	-0.023375	0.3891	1.5829	0.085717	0.29804	-0.22996	0.069539	0.071972	0.074413	0.040704	0.12048	0.13365	0.047395	0.032676	0.34209	-0.042631	-0.022961	-0.025419
230	0.21098	0.3576	0.15972	0.11758	0.28304	0.34232	0.067104	0.41923	1.3928	0.1323	0.446	-0.11229	0.11437	0.056569	0.10975	0.06179	0.070156	0.067815	0.011441	0.043596	0.2535	0.013042	0.11619	0.089494
235	0.23855	0.20784	0.18601	0.03324	0.37336	0.47245	0.037072	0.50514	1.4244	0.087607	0.39823	-0.05479	-0.0045785	0.1196	0.0013128	-0.0055947	0.15788	0.10519	0.017269	0.082928	0.25166	-0.068875	0.16989	0.023696
240	0.24327	0.21671	0.16435	0.05654	0.37762	0.11339	0.05909	0.59033	1.951	0.048833	0.424	0.095526	0.066535	0.079529	0.09194	0.07655	0.15526	0.044144	0.049021	0.11482	0.31387	-0.071159	0.10844	-0.0052711
245	0.18721	0.18497	0.18236	0.018379	0.33025	-0.13326	0.047894	0.60929	1.7285	0.35502	0.58465	0.03241	0.014965	0.12939	0.029689	-0.021958	0.081361	-0.078553	0.05732	0.11351	0.3343	0.0091897	0.18589	0.026147
250	0.15312	0.15048	0.2207	0.091172	0.47349	0.010122	0.13142	0.57693	1.9992	0.28836	0.5092	0.3555	0.1022	0.016429	0.044538	0.035905	0.11214	-0.038733	0.037405	0.11111	0.5303	-0.052797	0.24265	0.0073766
255	0.14854	0.17721	0.1895	0.083252	0.33877	-0.18992	0.081246	0.44175	1.432	0.3413	0.42057	0.38029	0.0459	0.068663	0.067434	0.011548	0.13029	-0.075322	0.012062	0.052829	0.36694	0.037307	0.18685	-0.022448
260	0.14277	0.48258	0.19915	0.034564	0.52544	-0.30447	0.021747	0.40315	1.6149	0.45295	0.21539	0.040518	0.12264	0.22889	0.092073	0.071718	0.23378	-0.016556	0.094291	0.13303	0.40293	0.10921	0.18893	0.03281
265	0.1579	0.39916	0.29013	0.062356	0.44176	-0.20441	0.11439	0.43252	1.7932	0.4129	0.33661	0.21201	0.13332	0.098675	0.11751	0.073747	0.22635	-0.23003	0.043534	0.19489	0.554	0.061507	0.21231	0.076539
270	0.12221	0.26187	0.2732	0.063539	0.37391	0.33617	0.10935	0.35129	2.0132	0.38343	0.31538	0.29697	0.12998	0.1213	0.10546	0.026881	0.14644	-0.054151	0.06143	0.15274	0.55883	0.11941	0.19696	0.0097291
275	0.15923	0.22756	0.26023	0.015344	0.2879	0.31757	0.094633	0.36903	0.65056	0.44784	0.42562	0.42498	0.07482	0.14898	0.10437	0.043879	0.19533	0.04246	0.098602	0.13339	0.35961	0.1471	0.25707	0.05482
280	0.15433	0.19583	0.24327	0.008487	0.26337	0.47649	0.07833	0.2333	0.58432	0.56595	0.42901	0.90329	0.10607	0.12948	0.13188	0.047052	0.18909	-0.013833	0.067168	0.10839	0.25107	0.32981	0.20612	0.11925
285	0.21294	0.129	0.19141	0.035174	0.28973	0.4444	0.060827	0.11656	1.1283	0.48694	0.39498	0.98835	0.083316	0.065542	0.13168	0.033214	0.13161	0.026521	0.10186	0.069988	0.33586	0.2777	0.19717	0.049182
290	0.11973	0.10704	0.19753	0.015888	0.25908	0.39549	0.071585	0.086998	1.0091	0.4036	0.38997	0.71723	0.13287	0.061762	0.12092	0.051478	0.21225	0.056749	-0.000858	0.062413	0.29071	0.25518	0.19726	0.090519
295	0.10147	0.21779	0.16711	0.021162	0.35907	0.76168	0.050453	0.055488	0.66099	0.34387	0.22284	0.23149	0.10764	0.083757	0.061004	0.053103	0.11893	0.17374	0.10095	0.12958	0.18471	0.30137	0.098176	0.0030834
300	0.051416	0.12658	0.2478	0.027825	0.31366	1.0159	0.075543	0.12159	0.87055	0.40668	0.048344	0.2786	0.0079682	0.12285	0.10729	0.054293	0.17074	0.24932	0.030515	0.040413	0.10813	0.1781	0.13197	0.0011661
305	0.09704	0.14273	0.23151	0.04525	0.305	0.80593	0.06853	0.11624	1.2363	0.33559	0.06177	0.40263	0.18438	0.12845	0.065972	0.093872	0.18917	0.35854	0.079328	0.067653	0.14817	0.30081	0.10737	0.049053
310	0.12791	0.14263	0.18373	0.031757	0.26292	0.63087	0.081696	0.10795	0.95143	0.29277	0.05858	0.92165	0.096525	0.10707	0.098503	0.018118	0.19523	0.32363	0.044395	0.13008	0.21349	0.2438	0.067268	0.033029
315	0.010092	0.13926	0.13443	0.020409	0.27304	0.61499	0.065766	0.11509	0.66731	0.41953	0.22283	1.1268	0.072545	0.067671	0.15141	0.016857	0.2279	0.29539	0.0024008	0.092111	0.051972	0.15088	0.094165	0.040417
320	0.071263	0.1456	0.12594	0.0024579	0.30674	0.48403	0.072187	0.059502	1.0098	0.39966	0.24107	1.8446	0.11434	0.044193	0.077105	0.05417	0.165	0.40943	0.067459	0.015237	0.14635	0.14604	0.11018	0.10168
325	0.11809	0.16108	0.15497	0.027901	0.38518	0.85026	0.073675	0.0063238	0.90115	0.39199	0.28324	1.9463	0.10251	0.12699	0.11553	0.038121	0.24532	0.37253	0.094024	0.074024	0.23835	0.24625	0.17728	0.20722
330	0.097459	0.11788	0.15379	0.048486	0.40978	1.0492	0.10524	0.026982	1.338	0.27483	0.30648	1.6896	0.054304	0.010519	0.087474	0.0084032	0.15785	0.35344	0.08049	0.058297	0.15277	0.19575	0.16218	0.15392
335	0.10929	0.14425	0.16275	0.031936	0.44299	1.0741	0.10284	0.099382	1.3445	0.35502	0.37886	1.7847	0.036697	0.066145	0.12307	0.044029	0.21663	0.55385	0.099497	0.046572	0.2327	0.18556	0.1573	0.17809
340	0.1158	0.12981	0.19266	0.071674	0.47218	1.273	0.15236	0.20718	1.5515	0.46968	0.30891	1.3403	0.10526	0.056305	0.15629	0.028082	0.23303	0.56058	0.10126	0.064118	0.30432	0.30398	0.21567	0.19657
345	0.092281	0.19585	0.16701	0.054905	0.41241	1.0902	0.13425	0.052925	1.183	0.32612	0.22526	1.0251	0.16789	0.14424	0.14268	0.054121	0.22576	0.61486	0.12336	0.095756	0.24381	0.22579	0.18446	0.21638
350	0.12296	0.33081	0.1362	0.073244	0.40152	1.3815	0.12965	0.081527	1.4396	0.30993	0.047043	0.75842	0.076183	0.049353	0.12405	0.064657	0.16945	0.7246	0.1165	0.036583	0.28352	0.31614	0.15588	0.14775
355	0.12507	0.23072	0.16834	0.083989	0.41603	1.0661	0.085326	0.17722	0.97655	0.24988	-0.024394	0.020677	0.021441	0.040166	0.12239	0.04542	0.12509	0.64996	0.042101	0.082432	0.30712	0.21334	0.080965	0.11236
360	0.13227	0.20118	0.17582	0.11321	0.40167	0.94875	0.093882	0.11526	0.80709	0.36502	-0.099943	-0.093315	0.12742	0.13724	0.15189	0.09561	0.33246	0.60712	0.085352	0.087313	0.20955	0.20956	0.083223	0.20883
365	0.10917	0.15611	0.18393	0.085225	0.32641	0.70774	0.063996	0.069645	0.66629	0.44848	-0.10976	0.16769	0.1695	0.13798	0.097109	0.11148	0.21216	0.51317	0.091565	0.012413	0.19488	0.22691	0.034579	0.076891
370	0.10266	0.096076	0.11287	0.092953	0.29073	1.1471	0.069282	0.0041457	0.49607	0.45505	-0.086218	0.68389	0.14005	0.17153	0.15987	0.14842	0.34613	0.63453	0.071847	0.084658	0.20232	0.22801	0.08788	0.19954
375	0.099049	0.10359	0.080866	0.097212	0.33607	1.4205	0.084127	0.10372	0.40471	0.472	0.028385	0.64201	-0.012882	0.091287	0.13868	0.080969	0.22679	0.70968	0.098666	0.045568	0.10576	0.31741	0.059964	0.11491
380	0.086671	0.15692	0.14745	0.1092	0.36824	1.444	0.15997	0.1662	0.64149	0.5992	0.2265	0.59828	0.11233	0.081134	0.1901	0.11943	0.21648	0.73405	0.13858	0.06988	0.12955	0.33643	0.079277	0.17695
385	0.11743	0.1384	0.19918	0.072569	0.3647	1.3979	0.14933	0.15826	0.82614	0.54916	0.33458	0.84428	0.15205	-0.0040973	0.070251	0.074069	0.22003	0.72027	0.13983	0.067718	0.24965	0.34458	0.15322	0.1578
390	0.10693	0.15346	0.1347	0.052121	0.33168	1.3666	0.11567	0.21349	0.67003	0.48262	0.44009	0.60541	0.059846	0.052967	0.12279	0.083033	0.25137	0.73184	0.11767	0.12322	0.14046	0.36722	0.14244	0.11413
395	0.20302	0.15275	0.14706	0.057301	0.30846	1.2263	0.10274	0.21781	1.3368	0.61833	0.47661	0.39509	0.10501	0.18958	0.1943	0.050382	0.25027	0.68211	0.15535	0.12675	0.16685	0.42586	0.1877	0.12871
400	0.11439	0.21277	0.10085	0.034433	0.29183	1.3402	0.13081	0.2243	1.4817	0.57337	0.41381	0.26425	0.055938	0.10251	0.12896	0.050921	0.21604	0.65931	0.14177	0.054841	0.24413	0.39303	0.19188	0.056327
405	0.096101	0.22439	0.025333	0.023041	0.29911	1.1022	0.1321	0.09978	1.1523	0.4656	0.41067	1.1997	0.015894	0.095207	0.066399	-0.0035418	0.14377	0.60833	0.033566	0.075357	0.1771	0.41919	0.13444	0.062608
410	0.12194	0.20061	0.01036	0.0081733	0.31356	1.0284	0.09473	0.064947	1.1779	0.4792	0.53531	1.3475	0.033039	0.026404	0.080889	0.035825	0.1936	0.51921	0.1392	0.093093	0.13376	0.44237	0.18488	0.17492
415	0.22921	0.17541	0.011923	0.060104	0.33309	1.267	0.13587	0.082282	0.99102	0.61266	0.54711	2.1529	0.1377	0.060489	0.087045	0.062929	0.21481	0.67539	0.14972	0.051922	0.31994	0.42234	0.21659	0.14412
420	0.2857	0.14997	0.024329	0.06988	0.36209	1.0431	0.15875	0.099842	1.0554	0.64479	0.49843	2.0312	0.027245	0.13652	0.063021	0.051185	0.18588	0.62871	0.10936	0.033213	0.20065	0.46245	0.22757	0.16434
425	0.27725	0.1252	0.0050551	0.051235	0.36461	0.6647	0.11149	0.15173	1.0821	0.53686	0.4021	1.3833	0.137	0.062655	0.046932	0.037706	0.14214	0.54089	0.1072	0.065756	0.15384	0.3878	0.22776	0.10322
430	0.18605	0.0843	0.061688	0.036285	0.40499	0.8605	0.073068	0.17478	0.95112	0.54829	0.47906	0.49979	0.061713	0.10004	0.034891	0.024026	0.21767	0.46958	0.042373	0.05667	0.19012	0.43877	0.23619	0.11894
435	0.1278	0.12166	0.074142	0.031043	0.38754	1.2345	0.085162	0.16401	0.86019	0.43005	0.45561	0.69775	0.13359	0.127	0.10313	0.062699	0.2868	0.59612	0.14553	0.055276	0.21937	0.3745	0.18696	0.19113
440	0.016433	0.16699	0.028976	-0.0055956	0.3447	1.2007	0.10241	0.032262	1.218	0.35895	0.5411	0.87047	0.058629	0.11012	0.054987	0.023545	0.21622	0.57695	0.1162	0.050602	0.18351	0.34533	0.25659	0.026363
445	0.067694	0.096062	0.023842	-0.0002516	0.38222	1.3294	0.1133	0.11803	2.1358	0.29822	0.41613	0.83197	0.038091	0.075329	0.065295	0.040145	0.16182	0.60581	0.073324	0.10434	0.31766	0.33767	0.24403	0.13102
450	0.011545	0.045387	0.057345	0.024388	0.28937	1.0872	0.083229	0.11413	2.4733	0.3201	0.40532	0.41972	-0.0066534	0.026983	0.067707	0.027488	0.17514	0.53887	0.074071	-0.02769	0.39194	0.34645	0.21276	0.14259
455	0.056154	0.082543	0.10952	0.014859	0.2588	1.1153	0.046795	0.32701	2.0156	0.17714	0.45808	0.49797	0.081441	0.095879	0.087995	0.0063809	0.1825	0.54608	0.096757	0.10479	0.39655	0.21946	0.2589	0.020694
460	0.010749	0.08926	0.2965	0.028755	0.25733	0.8276	0.088141	0.27767	0.35268	0.0023594	0.42549	1.1474	0.078995	0.10782	0.12018	0.054906	0.2183	0.51617	0.098992	0.12403	0.34266	0.19266	0.22339	0.073945
465	0.095346	0.12915	0.30487	0.059099	0.19104	0.53436	0.077767	0.33907	-0.13852	-0.051138	0.36686	1.2279	0.11058	0.071264	0.15641	0.043451	0.25217	0.56331	0.084018	0.099001	0.2212	0.13844	0.23521	0.18679
470	0.043804	0.091961	0.36642	0.091319	0.24173	0.54165	0.10086	0.27192	-0.10388	0.12809	0.34149	0.70317	0.080166	0.095591	0.21335	0.083401	0.17389	0.40383	0.087004	0.11744	0.23873	0.10161	0.24958	0.10727
475	0.11583	0.1382	0.39011	0.094022	0.23735	0.42912	0.05293	0.34062	-0.143	0.11141	0.21509	0.69409	-0.0077114	0.059533	0.092959	0.063992	0.17584	0.33556	0.024165	0.057635	0.061431	-0.0017485	0.15094	0.073286
480	0.10268	0.19349	0.47024	0.10978	0.32891	0.23001	0.067307	0.39461	-0.15331	0.15659	0.27655	1.4151	0.049547	0.073012	0.16642	0.10201	0.12899	0.33195	0.0027968	0.060572	-0.0021989	0.10291	0.15265	0.078049
485	0.074521	0.21457	0.44536	0.065407	0.35683	0.1089	0.019959	0.43463	-0.17076	0.070994	0.20887	1.6779	0.036562	0.06889	0.17705	0.13352	0.083553	0.29203	0.057062	0.13045	0.012962	0.0556	0.12492	0.20697
490	0.043997	0.28676	0.40244	0.11355	0.39108	-0.01032	0.049182	0.4228	0.48187	0.30216	0.27345	0.91147	0.05799	0.15197	0.15436	0.099402	0.1724	0.19736	0.013641	0.083352	0.047879	0.12948	0.098057	0.1107
495	0.051277	0.37816	0.3836	0.090106	0.50044	-0.0090601	0.027903	0.5251	1.1262	0.52171	0.28567	0.47532	0.072368	0.070037	0.16369	0.068869	0.12107	0.20104	0.084809	0.12775	0.056889	0.17733	0.1412	0.18173
500	0.024978	0.38344	0.36459	0.10789	0.52206	-0.07883	0.075985	0.47013	1.4861	0.44409	0.17829	0.12816	0.099954	0.060254	0.19586	0.1446	0.20935	0.16838	0.062455	0.14752	0.1475	0.27679	0.1429	0.074865
505	0.018397	0.27737	0.42535	0.089587	0.4199	-0.043594	0.067606	0.45237	0.39923	0.31621	0.27087	1.116	0.16216	0.08374	0.17609	0.16474	0.1733	0.085081	0.055014	0.082266	0.053521	0.28442	0.11466	0.15586
510	0.092156	0.33849	0.3545	0.084869	0.47237	0.15243	0.053042	0.34738	-0.17602	0.23107	0.25575	1.5827	0.095403	0.13421	0.19294	0.10878	0.15831	0.14009	0.078054	0.076919	0.066244	0.19471	0.035597	0.11106
515	0.037893	0.40402	0.38198	0.069541	0.60978	0.24891	0.043111	0.23011	-0.22878	0.047213	0.18328	1.0479	0.03257	0.12726	0.21017	0.15441	0.14485	0.19254	0.00056973	0.13845	0.12402	0.13877	0.18286	0.25684
520	0.081769	0.37797	0.28696	0.069458	0.67198	0.22423	0.05936	0.19849	-0.19436	0.133	0.19843	1.528	0.10387	0.23343	0.1448	0.09753	0.24041	0.1994	0.011786	0.11318	0.042971	0.080324	0.11702	0.23796
525	0.058697	0.27382	0.15465	0.061209	0.59817	0.33426	0.076968	0.051804	-0.12532	0.049186	0.24229	1.9314	0.082459	0.078041	0.18821	0.12796	0.20797	0.22138	0.068367	0.08096	-0.0024208	0.15183	0.13204	0.2772
530	0.062353	0.2647	0.092955	0.054393	0.56125	0.49502	0.084377	0.09287	-0.17213	0.015232	0.34133	2.6477	0.071632	0.093991	0.14595	0.13352	0.18048	0.19654	0.0078333	-0.0008219	-0.019903	0.055198	0.08642	0.34852
535	0.06953	0.18156	0.11998	0.048827	0.50043	0.30427	0.049742	0.14352	-0.11216	-0.095838	0.27158	1.754	0.030151	0.036695	0.11974	0.097476	0.18341	0.20037	0.052453	0.053628	-0.053816	0.06594	0.132	0.24629
540	0.10044	0.20723	0.1636	0.082253	0.49482	0.32628	0.010038	0.18117	0.083662	-0.12118	0.13321	1.1335	-0.024878	0.13878	0.15614	0.11159	0.18325	0.19754	0.05533	0.085893	-0.022791	-0.0053826	0.19205	0.24416
545	0.077285	0.13363	0.18947	0.059251	0.42225	0.060649	0.031127	0.17184	0.065894	-0.014786	0.26454	0.496	0.069038	0.10234	0.11569	0.11337	0.14876	0.17667	0.039732	0.1306	0.018768	0.040182	0.15702	0.18957
550	0.094262	0.11931	0.2096	0.077324	0.24987	0.18041	-0.0067413	0.20887	0.99638	0.024839	0.26005	-0.010704	0.092862	0.014483	0.12932	0.080762	0.16049	0.21908	0.0015062	0.060043	0.025779	0.0070696	0.13317	0.064501
555	0.13716	0.15489	0.3164	0.098313	0.31935	0.082191	0.0065048	0.1976	1.5745	0.053718	0.18507	0.0081432	0.10755	0.0576	0.14454	0.11272	0.12663	0.23961	0.034446	0.046575	0.077454	0.036692	0.13656	0.16339
560	0.17295	0.15433	0.37247	0.04957	0.34393	-0.0006369	0.0092433	0.32238	1.2866	0.10794	0.11288	-0.051711	0.084856	0.13045	0.11496	0.031015	0.11989	0.12836	0.0051648	0.04551	-0.030083	0.0035122	0.091252	-0.012157
565	0.085976	0.03945	0.32563	0.022072	0.35431	0.023722	0.027454	0.24217	1.2456	0.12512	0.079633	0.36418	0.081794	0.10271	0.12542	0.13416	0.14355	0.16872	0.088532	0.03646	0.058184	0.0096016	0.080081	0.15371
570	0.034487	0.10596	0.2577	-0.011604	0.22192	-0.0064082	-0.017655	0.14722	0.9885	0.071149	0.050842	0.44237	0.086296	0.073626	0.14841	0.12859	0.14177	0.053715	0.054031	0.11011	0.14559	0.018069	0.057939	0.10457
575	0.028412	0.1646	0.24783	0.017315	0.18215	0.17466	0.010119	0.10992	0.33079	0.24646	0.10425	1.1313	0.049222	0.10992	0.15887	0.052602	0.16244	0.16369	0.032878	0.012361	0.073302	0.034514	0.084491	0.049912
580	0.14259	0.1786	0.090564	-0.0095627	0.21518	0.44829	0.011581	-0.0088489	0.087101	0.30422	0.23013	1.4746	0.04654	0.10119	0.15374	0.025018	0.11806	0.13421	0.045926	0.024111	-0.0006591	0.045233	0.060206	0.16812
585	0.14816	0.07946	-0.0089316	-0.019815	0.33242	0.17105	-0.011032	-0.037021	0.099479	0.26666	0.080364	0.63549	-0.054909	0.048674	0.090702	0.029558	0.028571	0.09578	-0.0051926	-0.0030135	-0.016864	0.036087	0.02734	0.13024
590	0.12636	0.068916	-0.0029392	0.0038706	0.27763	0.028536	0.009322	-0.0010054	0.33341	0.10794	-0.039913	0.63299	0.080658	0.14938	0.10163	0.0067326	0.17277	0.23055	0.02544	0.099402	0.018972	0.065334	0.11957	0.17869
595	0.061852	0.052508	0.0054377	-0.0091975	0.37007	0.06768	-0.0099992	0.02368	0.13747	0.25894	0.081908	0.86185	0.07798	0.17086	0.037249	0.030767	0.079975	0.10863	0.001137	-0.023851	0.042051	0.11874	-0.0092176	0.13602
600	0.050268	0.14109	0.046386	0.011872	0.42237	0.15707	0.054018	-0.0089766	0.017943	0.29675	0.3785	0.98142	0.05098	0.091384	0.098258	0.043934	0.19116	0.19123	0.094837	0.11057	0.0050517	0.12559	0.13594	0.13055
605	0.079628	0.14454	0.10379	0.0046347	0.35486	0.27155	0.044563	0.053996	0.05126	0.38121	0.38224	0.87854	0.012042	0.085063	0.10023	0.029487	0.074052	0.039311	0.0047063	0.029403	0.031987	0.064305	0.13167	0.19673
610	0.086118	0.16593	0.16532	0.017014	0.34988	0.77831	0.059156	0.074873	0.21714	0.43683	0.39719	0.97779	0.050818	0.12778	0.10046	0.11909	0.070781	0.24163	0.089278	0.028189	-0.025414	0.18675	0.15592	0.14794
615	0.044327	0.094604	0.12361	0.023932	0.33472	0.92388	0.080114	0.12674	0.21834	0.40526	0.3528	0.67693	0.11487	0.12909	0.14027	0.072057	0.12154	0.31165	0.018388	0.04433	0.0033999	0.27719	0.15861	0.063651
620	0.099657	0.12019	0.091109	0.064047	0.4215	0.91128	0.076919	0.1309	0.68117	0.61487	0.26641	0.2369	0.075334	0.0079475	0.12962	0.038556	0.16244	0.30155	0.075561	0.056579	0.062179	0.26024	0.14308	0.073154
625	0.052456	0.11936	0.13711	0.060714	0.4995	0.37649	0.070341	0.1334	1.2233	0.70765	0.2453	0.24249	0.11321	0.091548	0.12065	0.055222	0.2013	0.31379	0.022444	0.023779	0.052557	0.30077	0.094442	0.018848
630	0.04671	0.1238	0.12101	0.068802	0.57813	0.34701	0.075715	0.089652	1.0136	0.88039	0.34297	0.15999	0.072812	0.11579	0.16208	0.10288	0.19012	0.27736	0.07867	0.010904	0.063325	0.36817	0.14093	0.073122
635	0.069688	0.092379	0.051967	0.049819	0.391	0.098797	0.10335	0.00029438	1.039	0.75576	0.33172	0.16707	0.062341	0.083549	0.10605	0.0054041	0.16579	0.163	0.13757	-0.0059157	0.053293	0.42823	0.12013	0.036961
640	0.054873	0.10276	0.039355	0.089986	0.37484	0.092636	0.093138	-0.023593	0.81316	0.66193	0.45106	0.2373	0.1136	0.13613	0.10921	0.10696	0.11868	0.16651	0.013936	0.062743	0.093933	0.44846	0.25053	0.11437
645	0.049587	0.2244	0.02375	0.086966	0.32902	0.26196	0.058267	0.11132	0.59309	0.8378	0.32615	0.43287	0.028954	0.16631	0.046729	0.052506	0.19014	0.19925	0.0671	0.013623	0.044344	0.55315	0.18874	0.052162
650	0.066783	0.33612	0.0011458	0.091089	0.30565	0.57502	0.074684	0.22774	0.63172	0.69411	0.50123	0.76756	-0.0021535	0.15416	0.14397	-0.0097731	0.11606	0.21076	0.059258	0.070385	0.070068	0.50781	0.17753	0.1521
655	0.072399	0.27668	0.071894	0.11399	0.29089	0.35963	0.079904	0.29691	0.76217	0.60586	0.37123	0.42682	0.0090886	0.11894	0.078294	0.067735	0.12264	0.2206	0.12147	0.022794	0.15643	0.45072	0.15545	-0.001902
660	0.079873	0.24082	0.080533	0.13019	0.45536	0.77038	0.10109	0.22307	0.64347	0.6232	0.37413	0.54782	0.05392	0.071722	0.11553	0.052825	0.17769	0.31372	0.091924	0.032877	0.090606	0.4516	0.18628	0.10379
665	0.014648	0.27581	0.058506	0.084802	0.39155	1.0743	0.10357	0.275	0.7456	0.70573	0.48639	0.4615	0.021632	0.043792	0.099678	0.11015	0.071606	0.36717	0.060406	0.034357	0.097987	0.4521	0.14935	0.054873
670	0.047094	0.2517	0.040529	0.07993	0.61541	1.4278	0.12683	0.28813	0.72311	0.77422	0.42718	0.94918	0.022377	0.12236	0.027661	0.067811	0.15801	0.41891	0.10156	0.095085	-0.0014793	0.40986	0.15782	0.095197
675	-0.0055474	0.24719	0.032117	0.048549	0.57068	1.166	0.12511	0.44739	0.85926	0.77615	0.46427	1.4077	0.029035	0.08566	0.093958	0.053112	0.14286	0.40692	0.053909	0.066562	0.12056	0.46585	0.17659	0.17146
680	-0.0030182	0.29341	0.052342	0.029446	0.59445	1.1145	0.13855	0.66352	1.2615	0.78487	0.49065	1.2533	0.082651	0.14196	0.083983	0.054178	0.17865	0.41171	0.034843	0.16945	0.076423	0.50314	0.16751	0.14816
685	0.010271	0.26705	0.035392	0.019331	0.61024	0.94001	0.081892	0.6741	1.4787	0.70834	0.4346	0.83686	0.10321	0.165	0.067909	-0.0089073	0.2476	0.41685	-0.000473	0.068151	0.099476	0.40717	0.15539	0.18052
690	-0.025169	0.32103	0.022961	0.036281	0.5504	0.66846	0.062779	0.50724	1.199	0.50665	0.33885	0.43414	0.0358	0.1143	0.060741	0.050802	0.204	0.36993	0.0034571	0.039363	-0.042474	0.42728	0.14442	0.080503
695	0.053179	0.25015	0.020155	0.051131	0.5649	0.49275	0.098142	0.32384	1.4096	0.54952	0.32258	0.56467	0.064609	0.068751	0.027121	0.02833	0.10485	0.34209	0.092773	0.065515	0.15982	0.44137	0.19005	0.063987
700	0.0072038	0.23001	0.069793	0.049522	0.3219	0.65558	0.074194	0.16087	1.2087	0.52072	0.33282	0.31611	0.084032	0.14437	0.059565	0.021884	0.083292	0.30661	0.094006	0.12015	0.11479	0.38593	0.22929	0.078695
705	0.076713	0.17499	0.073446	0.055553	0.21385	0.6035	0.074274	0.1691	1.2328	0.41007	0.34108	0.17249	0.10045	0.086971	0.027733	0.075414	0.12126	0.38275	0.084664	0.044383	0.16292	0.39545	0.12078	0.067195
710	0.12736	0.15007	0.10201	0.13313	0.23269	0.49319	0.083104	0.13992	1.0376	0.34658	0.40573	0.12776	0.042089	0.12081	0.13349	0.020872	0.1142	0.41438	0.10982	0.085059	0.10801	0.28242	0.18032	-0.0078873
715	0.081921	0.13143	0.07408	0.11149	0.12205	0.48977	0.057414	-0.028143	0.99634	0.54295	0.36509	0.084985	0.089031	0.049641	0.12354	0.057868	0.048888	0.31225	0.05308	0.01823	0.13846	0.36326	0.12269	0.028305
720	0.13344	0.13813	0.069959	0.10486	0.17397	0.43202	0.11033	0.024077	1.3918	0.7288	0.41007	0.17784	0.11477	0.077099	0.036826	0.048817	-0.0002238	0.28188	0.090793	0.010034	0.11796	0.37315	0.17043	0.025492
725	0.10367	0.059751	0.083944	0.10961	0.11611	0.37996	0.088833	0.16036	1.7423	0.70185	0.28887	0.053041	0.042521	0.026953	-0.003316	0.095855	0.052819	0.24406	0.048627	0.079395	0.13334	0.43918	0.15465	-0.027882
730	0.0657	0.041389	0.055345	0.13372	0.14442	0.36135	0.077233	0.19321	1.5683	0.43486	0.20959	0.091283	0.12336	0.11606	0.084916	0.16028	0.098651	0.35916	0.1118	0.050665	0.20913	0.37159	0.21027	0.01576
735	0.070408	0.051914	0.089924	0.1095	0.17072	0.72691	0.094511	0.11626	0.73218	0.36171	0.29852	0.79346	0.076806	0.14613	0.11503	0.15466	-0.05733	0.30379	0.091317	0.062427	0.14244	0.38115	0.17484	0.084645
740	0.060204	0.091174	0.14616	0.091047	0.24652	0.66898	0.080379	0.0067265	0.66416	0.24423	0.25865	0.50477	-0.02912	0.06238	0.058776	0.086595	-0.013389	0.34626	0.085872	0.031618	0.14237	0.1968	0.12731	0.0063877
745	0.067941	0.015607	0.073201	0.049154	0.10648	0.50755	0.033694	0.027125	0.49088	0.17419	0.15486	0.25725	0.082325	0.029602	0.083702	0.13858	0.033411	0.32942	0.042867	-0.012574	0.1864	0.28262	0.12041	0.067241
750	0.080113	0.063729	0.060566	0.062086	0.23435	0.54685	0.042672	0.056546	0.56615	0.040373	0.10567	0.21277	0.080831	0.017792	0.044168	0.10199	-0.0060682	0.32788	0.10485	0.080462	0.10643	0.212	0.11622	0.088934
755	0.087143	0.16822	0.12319	0.081831	0.30021	0.65598	0.021088	0.029645	0.66618	0.060392	0.089897	0.25212	0.097213	0.11285	0.078995	0.11352	0.062357	0.28856	0.050144	0.047836	0.2161	0.15058	0.1069	0.11098
760	0.091733	0.084207	0.13412	0.030086	0.33833	0.52298	0.081121	0.048551	0.72819	0.034824	0.11896	0.24686	0.092694	0.093478	0.088107	0.15976	0.076202	0.31234	0.014752	0.022036	0.22623	0.095959	0.11471	0.047551
765	0.078149	0.085211	0.10011	0.024573	0.29275	0.42593	0.040962	0.024458	0.7981	0.027727	0.2796	0.34777	0.099759	0.15404	0.07738	0.093248	0.029643	0.30127	0.10627	0.041258	0.21282	0.081344	0.1791	0.060078
770	0.068973	0.10027	0.13221	0.015432	0.49514	0.56152	0.064028	0.13988	0.96935	0.063967	0.17125	0.34729	0.01827	0.11701	0.10262	0.06895	0.07651	0.34448	0.062269	0.030452	0.18422	0.12196	0.073056	0.0037701
775	0.081805	0.10057	0.12221	-0.0090259	0.3159	0.47153	0.022121	0.081393	1.0291	-0.012527	0.056606	0.43132	0.035495	0.12025	0.081837	0.083836	0.042153	0.28914	0.082864	0.048019	0.188	0.11401	0.13229	0.036336
780	0.10646	0.16645	0.13379	0.043946	1.3679	0.42213	0.05281	0.15091	1.1078	-0.021777	-0.062942	0.40526	0.06742	-0.0065041	0.11188	0.10567	0.30742	0.30622	0.067819	0.10852	0.2605	0.048609	0.065627	0.0564
785	0.099781	0.18194	0.17183	0.072098	2.3594	0.44481	0.061279	0.13408	0.99075	-0.0075315	-0.052331	0.46941	0.09221	0.069865	0.13223	0.075639	1.0123	0.27614	0.04643	0.080591	0.19165	0.081854	0.069476	0.040265
790	0.11946	0.1568	0.18793	0.094213	2.4138	0.59891	0.10775	0.21744	0.90304	-0.0052005	-0.088305	0.49492	0.11831	0.077515	0.12807	0.042129	1.2615	0.2932	0.099538	0.13223	0.18637	0.082042	0.032933	0.039196
795	0.076925	0.1162	0.18792	0.068375	1.8705	0.62306	0.099783	0.14812	0.87637	0.0043798	-0.0030726	1.1056	0.077922	0.053702	0.087148	0.058349	1.0668	0.33677	0.036002	0.072089	0.17426	0.054507	0.046368	0.037999
800	0.093096	0.27343	0.2143	0.10258	2.0899	0.38481	0.069658	0.15051	0.81944	-0.021035	-0.0008816	0.84686	0.056776	0.086897	0.13615	0.037237	1.0769	0.32939	0.048729	0.09387	0.23636	0.050114	0.048933	0.11373
805	0.11706	0.032839	0.20095	0.03129	0.23603	0.33049	0.038277	0.17446	0.7808	0.032819	0.10259	1.1436	0.065089	0.08311	0.13572	0.04569	0.75016	0.28171	0.056045	0.074833	0.1284	0.051054	0.030662	0.060227
810	0.118	0.039935	0.20376	0.043331	-0.17557	0.24376	0.038172	0.29374	0.87457	0.10091	0.21051	1.2456	0.15145	0.020589	0.067503	0.0464	0.4548	0.29738	0.10265	0.019164	0.29279	0.099439	0.14589	0.1866
815	0.16551	0.24582	0.21444	0.019463	-0.19794	0.20721	0.031539	0.41965	0.80155	0.1592	0.40422	0.85684	0.095559	0.056872	0.076294	0.018625	0.26508	0.30852	0.034004	0.082241	0.19062	0.017484	0.083596	0.1704
820	0.1384	0.076071	0.15307	0.031483	-0.22434	0.31926	0.052865	0.28136	0.71468	0.21039	0.38771	0.94397	0.16511	0.069284	0.11814	0.077437	0.13054	0.32872	0.031402	0.099555	0.17938	0.1156	0.13895	0.14502
825	0.12244	0.28939	0.22166	0.073215	-0.1502	0.49045	0.074985	0.23244	0.832	0.33394	0.42777	0.80217	0.12405	0.01746	0.073019	0.072009	0.11198	0.23003	0.058554	0.092403	0.15126	0.11263	0.11743	-0.0029141
830	0.14495	0.16065	0.20748	0.011596	-0.17681	0.5104	0.053408	0.1751	0.79916	0.31449	0.40761	0.53664	0.054168	0.074276	0.097153	0.0055855	-0.078269	0.27854	0.032268	0.080947	0.23404	0.074929	0.097908	0.086394
835	0.21479	0.15883	0.18409	0.048163	-0.16302	0.54908	0.04908	0.15905	0.84732	0.31931	0.31603	0.54695	0.092378	0.11325	0.11943	0.058725	0.031668	0.26824	0.06159	0.074577	0.34753	0.1677	0.14149	0.062771
840	0.14413	0.22808	0.17124	0.011299	-0.18068	0.69664	0.062687	0.12277	0.96867	0.41739	0.29747	0.62743	0.049835	0.10541	0.090422	0.0074185	-0.059722	0.26406	0.061274	0.0961	0.22744	0.16017	0.094608	0.048775
845	0.10926	0.28857	0.14229	-0.0019193	-0.16535	0.82239	0.018424	0.043278	1.1631	0.35616	0.30285	0.69637	0.14052	0.067645	0.11592	0.10863	-0.088535	0.3299	0.037748	0.023531	0.27527	0.16977	0.18699	0.23445
850	0.1467	0.14548	0.17327	0.0093767	-0.15318	0.86972	0.045788	0.04838	1.1619	0.38111	0.29377	0.74556	0.043293	0.096294	0.061498	0.00096067	-0.054616	0.30208	0.057853	0.066178	0.28262	0.19449	0.1006	0.16327
855	0.20491	0.083255	0.21234	0.011058	-0.12372	0.90861	0.084173	0.22195	1.1093	0.54404	0.35333	0.79515	0.066357	0.052785	0.024591	-0.081385	-0.15962	0.25409	0.037635	0.060868	0.24236	0.21145	0.13666	0.094013
860	0.12977	0.058571	0.25035	-0.0052622	-0.18421	0.77694	0.048408	0.27685	1.2071	0.46839	0.30154	0.80943	0.052593	0.044262	0.13505	0.0083812	-0.10618	0.39665	0.051094	0.10035	0.26231	0.19695	0.13229	0.1425
865	0.17733	0.13863	0.27593	0.030547	-0.15094	0.78623	0.062	0.34495	1.3128	0.50378	0.28046	0.66105	0.040737	0.011004	0.11374	0.033808	-0.12234	0.31229	0.05057	0.088889	0.26638	0.24335	0.043709	0.1799
870	0.24136	0.29645	0.18996	0.074197	-0.019016	0.85443	0.080712	0.33099	1.3184	0.57118	0.20323	0.73589	0.082653	0.06649	0.064412	0.025802	-0.086136	0.27736	0.06513	0.10819	0.2586	0.25239	0.13638	0.15684

## Sheet: Figure 4B-C
Figure 4B-C
day 3	area_avg	frequency	day 5	area_avg	frequency
d3_20180410_GCaMP6s_F1L5	36.71	0.0289	d5_20180515_GCaMP6s_F1DV1_14	3.11	0.0189
	8.01	0.0289		3.42	0.01
	15.2	0.0256		0.55	0.0033			magnitude	frequency
	0.31	0.0033		0.99	0.0056		Column B	mature 5 dpf	mature 5 dpf
	16.1	0.0256		0	0		vs.	vs.	vs.
	4.06	0.0078		3.8	0.0167		Column A	developing 3 dpf	developing 3 dpf
	1.38	0.0044		16.27	0.0211
d3_20180326_GCaMP6s_F1L3	100.74	0.0244		1.49	0.0067		Mann Whitney test
	28.04	0.0222		0	0		P value	<0.0001	<0.0001
	102.89	0.0244		0	0		Exact or approximate P value?	Exact	Exact
	0.44	0.0033		0	0		P value summary	****	****
	1.57	0.0056		1.9	0.0022		Significantly different (P < 0.05)?	Yes	Yes
	49.48	0.0233		0	0		One- or two-tailed P value?	Two-tailed	Two-tailed
	7.85	0.0167		0	0		Sum of ranks in column A,B	4399 , 3857	4308 , 3948
	8.68	0.0178	d5_20180515_GCaMP6s_F2L3_13	10.87	0.0233		Mann-Whitney U	854	945
d3_20180730_GCaMP6s_F2DV1	87.01	0.0333		40.92	0.0333
	4.84	0.0222		2.43	0.0111		Difference between medians
	1.73	0.0056		0.32	0.0033		Median of column A	11.33, n=51	0.02220, n=51
	9.62	0.0244		0.33	0.0033		Median of column B	0.9900, n=77	0.004400, n=77
	10.9	0.0189		0.64	0.0056		Difference: Actual	-10.34	-0.0178
	4.21	0.0156		0	0		Difference: Hodges-Lehmann	-9.73	-0.01
	14.46	0.03		0.24	0.0011
	38.68	0.0322		1.34	0.0078
d3_20180326_GCaMP6s_F3L4	71.28	0.0267		1.31	0.0078
	42.22	0.0233		1.93	0.0089
	11.33	0.0222		0.39	0.0011
	87.2	0.0267		37.57	0.03
	101.18	0.0244	d5_20180515_GCaMP6s_F3L3_12	5.91	0.02
	61.27	0.0233		0.44	0.0033
	80.2	0.0222		0.37	0.0022
	10.91	0.0178		17.21	0.0222
	54.37	0.03		38.93	0.0311
d3_20180410_GCaMP6s_F1L4	0.59	0.0022		0	0
	35.76	0.0267		0	0
	10.82	0.0178		0.78	0.0056
	122.33	0.0311		2	0.0044
	8.99	0.0233		0	0
	113.78	0.0222		0	0
	12.53	0.0211		6.31	0.0289
	10.79	0.0133	d5_20180523_GCaMP6s_F1L1_12	0	0
	75.1	0.0189		19.67	0.0267
d3_20180723_GCaMP6s_F2L3	12.45	0.03		0	0
	4.79	0.0144		9.54	0.0244
	45.67	0.0256		110.99	0.0144
	11.04	0.02		3.81	0.02
	2.43	0.0089		0	0
	0.43	0.0022		0	0
	13.41	0.0222		0	0
	0.1	0.0011		0.11	0.0011
	0.21	0.0022		0	0
	3.79	0.0089		0.1	0.0011
			d5_20180523_GCaMP6s_F2L1_13	2.13	0.01
				9.14	0.0211
				14.98	0.02
				48.25	0.0244
				14.27	0.0222
				0.61	0.0033
				0.67	0.0044
				3.27	0.0167
				13.74	0.0178
				21.09	0.0222
				33.94	0.0222
				5.05	0.0189
				0.1	0.0011
			d5_20180523_GCaMP6s_F2L4_13	0	0
				13.6	0.0233
				5.74	0.0222
				37.66	0.0267
				4.74	0.0178
				5	0.0133
				0.25	0.0011
				0.51	0.0033
				0.17	0.0011
				0.65	0.0044
				0.65	0.0044
				0.11	0.0011
				0.99	0.0033
