# Supplementary material for: Synaptic mitochondria regulate hair-cell synapse size and function
Source: eLife journal article supplement (doi:10.7554/elife.48914), 2019-10-14
Supplement: supp [file elife-48914-supp-v1.zip › elife_poa_e48914_Figure_5_figure_supplement_1_source_data_1.xlsx]

## Sheet: Figure 5-figure sup1 A-C
Figure 5-figure supplement 1 A-C
								Table Analyzed	Area RibB		Area MAGUK		Area Rib b ALL only
		3 dpf
Ribeye b Area				MAGUK Area				Column B	PLL		PLL		Ru360 2 μM 1 hr
DMSO/ALL	Ru360 2 μM 1 hr	PLL		ALL	PLL			vs.	vs.		vs.		vs.
0.3185	0.3254	0.3854		0.1719	0.2018			Column A	ALL		ALL		DMSO
0.3167	0.357	0.3317		0.1886	0.1657
0.2905	0.3758	0.3138		0.1632	0.2193			Unpaired t test with Welch's correction
0.252	0.2624	0.2745		0.2036	0.1892			P value	0.6531		0.5057		0.0389
0.2741	0.3832	0.2519		0.1735	0.1553			P value summary	ns		ns		*
0.3482	0.346	0.299		0.1853	0.1653			Significantly different (P < 0.05)?	No		No		Yes
0.2427	0.324	0.332		0.2074	0.2304			One- or two-tailed P value?	Two-tailed		Two-tailed		Two-tailed
0.2802	0.2634	0.2202		0.1895	0.1797			Welch-corrected t, df	t=0.4564, df=19.95		t=0.6774, df=20.49		t=2.207, df=20.54
0.2949	0.2908	0.2345		0.2148	0.168
0.3453	0.2784	0.3263		0.1363	0.2077			How big is the difference?
0.2722	0.3725	0.3149		0.2326	0.2741			Mean of column A	0.2925		0.1866		0.2925
0.2742	0.3565	0.3168		0.1721	0.1826			Mean of column B	0.3001		0.1949		0.328
								Difference between means (B - A) ± SEM	0.007625 ± 0.01671		0.008358 ± 0.01234		0.03549 ± 0.01608
								95% confidence interval	-0.02723 to 0.04248		-0.01734 to 0.03406		0.001995 to 0.06899
								R squared (eta squared)	0.01033		0.0219		0.1916
								F test to compare variances
								F, DFn, Dfd	1.944, 11, 11		1.745, 11, 11		1.728, 11, 11
								P value	0.2856		0.3699		0.3781
								P value summary	ns		ns		ns
								Significantly different (P < 0.05)?	No		No		No
								Data analyzed
								Sample size, column A	12		12		12
								Sample size, column B	12		12		12
