# Supplementary material for: Synaptic mitochondria regulate hair-cell synapse size and function
Source: eLife journal article supplement (doi:10.7554/elife.48914), 2019-10-14
Supplement: supp [file elife-48914-supp-v1.zip › elife_poa_e48914_Figure_5_figure_supplement_2_source_data_1.xlsx]

## Sheet: Figure 5-figure sup2A
Figure 5-figure supplement 2A
3dpf maguk area
C							Column B		Israd 10 μM 1 hr	Ru360 2 μM 1 hr	Ru360 10 μM 1hr
DMSO	Israd 10 μM 1 hr	DMSO	Ru360 2 μM 1 hr	DMSO	Ru360 10 μM 1hr		vs.		vs.	vs.	vs.
0.2109	0.2104	0.2018	0.266	0.2279	0.2074		Column A		DMSO	DMSO	DMSO
0.2174	0.1858	0.1657	0.2053	0.2146	0.2713
0.1552	0.1945	0.2193	0.1508	0.2052	0.2204		Unpaired t test with Welch's correction
0.2108	0.1585	0.1892	0.1893	0.1739	0.2615		P value		0.3866	0.9423	0.1176
0.2067	0.1483	0.1553	0.1946	0.1813	0.1751		P value summary		ns	ns	ns
0.1731	0.1764	0.1653	0.2173	0.1922	0.2069		Significantly different (P < 0.05)?		No	No	No
0.2071	0.1793	0.2304	0.21	0.2235	0.2104		One- or two-tailed P value?		Two-tailed	Two-tailed	Two-tailed
0.1787	0.1935	0.1797	0.1823	0.197	0.2006		t, df		t=0.8886, df=17	t=0.07322, df=22	t=1.652, df=16.27
0.176	0.2164	0.168	0.1139	0.1984	0.3758
0.2002		0.2077	0.1893	0.2546	0.2178		How big is the difference?
		0.2741	0.1997	0.1878	0.2336		Mean of column A		0.1936	0.1949	0.2092
		0.1826	0.2079	0.2539	0.2652		Mean of column B		0.1848	0.1939	0.2372
							Difference between means (B - A) ± SEM		-0.008821 ± 0.009927	-0.001058 ± 0.01445	0.02798 ± 0.01693
							95% confidence interval		-0.02976 to 0.01212	-0.03103 to 0.02892	-0.007866 to 0.06382
							R squared (eta squared)		0.04439	0.0002437	0.1437
							F test to compare variances
							F, DFn, Dfd		1.115, 8, 9	1.158, 11, 11	3.916, 11, 11
							P value		0.8671	0.8116	0.0326
							P value summary		ns	ns	*
							Significantly different (P < 0.05)?		No	No	Yes
							Data analyzed
							Sample size, column A		10	12	12
							Sample size, column B		9	12	12
