# Supplementary material for: Synaptic mitochondria regulate hair-cell synapse size and function
Source: eLife journal article supplement (doi:10.7554/elife.48914), 2019-10-14
Supplement: supp [file elife-48914-supp-v1.zip › elife_poa_e48914_Figure_5_source_data_1.xlsx]

## Sheet: Figure 5D
Figure 5D
3 dpf
Synapses per hair cell
DMSO	Israd 10 μM 1 hr	DMSO	Ru360 2 μM 1 hr	DMSO	Ru360 10 μM 1hr
2.91667	3.27273	2.3	2.875	2.5	2.66667
2.72727	1.83333	3.5	3.125	2.11111	2.88889
2.53846	3	3.1	4	2.5	2.3				Israd 10 μM 1 hr	Ru360 2 μM 1 hr	Ru360 10 μM 1hr
2.91667	3.36364	3.375	2.8	2.75	2.08333				vs.	vs.	vs.
2.5	2.42857	4.25	2.8	3.1	3				DMSO	DMSO	DMSO
2.2	1.53846	3.66667	2.875	2.25	2.5
3.3	1.72727	3	3.3	3.3	2.3			Unpaired t test
3.5	3.71429	3.16667	3.25	2.6	1.6			P value	0.3423	0.4372	0.561
2.90909	2.44444	4.1	2.8	3.5	3			P value summary	ns	ns	ns
4.42857	2.625	2.9	3.4	2.5	3.2			Significantly different (P < 0.05)?	No	No	No
1.54546	2.27273	2	2.9	4	3.8			One- or two-tailed P value?	Two-tailed	Two-tailed	Two-tailed
2.54546	2.5	3.4	2.55556	3.375	3.42857			t, df	t=0.9705, df=22	t=0.7913, df=22	t=0.5903, df=22
								How big is the difference?
								Mean of column A	2.836	3.23	2.874
								Mean of column B	2.56	3.057	2.731
								Difference between means (B - A) ± SEM	-0.2756 ± 0.2840	-0.1731 ± 0.2188	-0.1432 ± 0.2426
								95% confidence interval	-0.8645 to 0.3133	-0.6269 to 0.2806	-0.6464 to 0.3600
								R squared (eta squared)	0.04106	0.02768	0.01559
								F test to compare variances
								F, DFn, Dfd	1.101, 11, 11	2.834, 11, 11	1.144, 11, 11
								P value	0.8758	0.0982	0.8275
								P value summary	ns	ns	ns
								Significantly different (P < 0.05)?	No	No	No
								Data analyzed
								Sample size, column A	12	12	12
								Sample size, column B	12	12	12

## Sheet: Figure 5E
Figure 5E
3 dpf ribbon size							Ribbon size	Israd 10 μM 1 hr	Ru360 2 μM 1 hr	Ru360 10 μM 1hr
DMSO	Israd 10 μM 1 hr	DMSO	Ru360 2 μM 1 hr	DMSO	Ru360 10 μM 1hr			vs.	vs.	vs.
0.3161	0.2748	0.3854	0.4385	0.3191	0.4742			DMSO	DMSO	DMSO
0.2996	0.3383	0.3317	0.286	0.3234	0.3046
0.3178	0.3414	0.3138	0.3652	0.3313	0.2993		Unpaired t test with Welch's correction
0.2642	0.285	0.2745	0.3127	0.3022	0.3313		P value	0.0033	0.0223	0.0217
0.2949	0.2969	0.2519	0.3727	0.3155	0.3291		P value summary	**	*	*
0.2985	0.3227	0.299	0.3539	0.3487	0.3277		Significantly different (P < 0.05)?	Yes	Yes	Yes
0.2852	0.3246	0.332	0.3101	0.3012	0.3682		One- or two-tailed P value?	Two-tailed	Two-tailed	Two-tailed
0.2401	0.3436	0.2202	0.3204	0.2835	0.4119		Welch-corrected t, df	t=3.298, df=21.86	t=2.459, df=21.94	t=2.591, df=13.68
0.2616	0.3297	0.2345	0.3399	0.3421	0.4392
0.2931	0.3793	0.3263	0.2934	0.3389	0.3782		How big is the difference?
0.1821	0.4	0.3149	0.4342	0.3312	0.3468		Mean of column A	0.2801	0.3001	0.3211
0.3074	0.3248	0.3168	0.3556	0.3162	0.3559		Mean of column B	0.3301	0.3486	0.3639
							Difference between means (B - A) ± SEM	0.05004 ± 0.01517	0.04847 ± 0.01971	0.04276 ± 0.01650
							95% confidence interval	0.01856 to 0.08152	0.007584 to 0.08935	0.007285 to 0.07823
							R squared (eta squared)	0.3322	0.216	0.3292
							F test to compare variances
							F, DFn, Dfd	1.172, 11, 11	1.108, 11, 11	8.085, 11, 11
							P value	0.7973	0.8684	0.0017
							P value summary	ns	ns	**
							Significantly different (P < 0.05)?	No	No	Yes
							Data analyzed
							Sample size, column A	12	12	12
							Sample size, column B	12	12	12

## Sheet: Figure 5G
Figure G
hair cell per neuromast			Extrasynaptic puncta/ hair cell				Extrasynaptic puncta/ hair cell	Ru360 10μM
DMSO	Ru360 10μM		DMSO	Ru360 10μM				vs.
10	6		3.4	16.6667				DMSO		HC counts 10uM Ru360	Ru360 2 μM 1 hr
9	9		1.44444	10.6667							vs.
10	10		2.5	7.5			Unpaired t test with Welch's correction				DMSO
12	12		2.83333	11			P value	<0.0001
10	10		1.2	19.7			P value summary	****		Unpaired t test
12	12		1.66667	12.1667			Significantly different (P < 0.05)?	Yes		P value	0.7962
10	10		2.3	16.6			One- or two-tailed P value?	Two-tailed		P value summary	ns
10	10		2.9	12.6			Welch-corrected t, df	t=6.535, df=10.32		Significantly different (P < 0.05)?	No
10	5		2.2	8						One- or two-tailed P value?	Two-tailed
12	5		2.08333	2.8			How big is the difference?			t, df	t=0.2614, df=22
8	7		2.25	11.2857			Mean of column A	2.284
8			2.625				Mean of column C	11.73		How big is the difference?
							Difference between means (C - A) ± SEM	9.442 ± 1.445		Mean of column C	9
							95% confidence interval	6.237 to 12.65		Mean of column D	8.833
							R squared (eta squared)	0.8053		Difference between means (D - C) ± SEM	-0.1667 ± 0.6376
										95% confidence interval	-1.489 to 1.156
							F test to compare variances			R squared (eta squared)	0.003096
							F, DFn, Dfd	56.50, 10, 11
							P value	<0.0001		F test to compare variances
							P value summary	****		F, DFn, Dfd	1.091, 11, 11
							Significantly different (P < 0.05)?	Yes		P value	0.8878
										P value summary	ns
							Data analyzed			Significantly different (P < 0.05)?	No
							Sample size, column A	12
							Sample size, column C	11
