# Supplementary material for: Synaptic mitochondria regulate hair-cell synapse size and function
Source: eLife journal article supplement (doi:10.7554/elife.48914), 2019-10-14
Supplement: supp [file elife-48914-supp-v1.zip › elife_poa_e48914_Figure_6_source_data_1.xlsx]

## Sheet: Figure 6B-C
Figure 6 B										Figure 6 C
3 dpf cytoRGECO										5 dpf cytoRGECO
mock treated	Israd 10μM	BayK 10μM	Ru360 10μM							mock treated	Israd 10μM	BayK 10μM	Ru360 10μM
-21.6207										81.4158	-139.082	772.391	83.9418
-23.5247										15.0378	-181.523	487.753	-209.498
-15.2377										93.6808	-107.97	608.054	77.2338
9.5893										95.9578	-173.463	541.612	41.1308
-71.3837										115.414	-58.9012	-157.485
-69.1737											17.0148	619.419
-99.4247											-51.4862	1310.11
-44.9017										-197.468	1.56277	612.913	-43.6036
-1.3947										-81.8776	-211.757	1368.86	47.2054
46.5493										-4.63657	85.1658	546.623	2.59143
16.6083										-33.9166	-257.626	1268.46	73.8034
0.267304										101.365	-297.017	698.295	289.415
11.5823										146.171	-322.483	584.8	-145.892
23.5463										70.3614		524.432
-23.6957												671.32
-50.7167
-22.2747													268.81
65.4553										13.1257			-232.217
58.2083										-2.57329			-217.652
68.4933										-1.37729			-101.461
42.5423										20.2577			-168.751
23.5463										61.6247
76.9603										-59.9073
-11.453										-31.1503
-21.952
	-68.4917
	-52.0837									5 dpf cytoRGECO
	-33.6797									Brown-Forsythe ANOVA test
	-134.651									F* (DFn, DFd)	5.405 (2.000, 31.81)
	-215.446									P value	0.0095
	-147.308									P value summary	**
	30.6043									Significant diff. among means (P < 0.05)?	Yes
	-173.672
		286.617								Welch's ANOVA test
		271.324								W (DFn, DFd)	7.123 (2.000, 23.48)
		298.602								P value	0.0038
		355.409								P value summary	**
		316.35								Significant diff. among means (P < 0.05)?	Yes
		282.951
		248.655								Data summary
		100.919								Number of treatments (columns)	3
		-134.533								Number of values (total)	47
		125.908
		74.9885								Multiple comparison
		124.18								Number of families	1
		90.2575								Number of comparisons per family	2
		121.525								Alpha	0.05
			59.8313
			45.0523							Dunnett's T3 multiple comparisons test	Mean Diff.	95.00% CI of diff.	Significant?	Summary	Adjusted P Value	A-?
			400.102							mock vs. Israd 10μM	151.7	42.68 to 260.7	Yes	**	0.0023	B	Column B
			46.3333							mock vs. Ru360 10μM	36.79	-91.49 to 165.1	No	ns	0.6808	D	Column D
			-61.3147
			-22.6217							Test details	Mean 1	Mean 2	Mean Diff.	SE of diff.	n1	n2	t	DF
			-53.3857							mock vs. Israd 10μM	21.13	-130.6	151.7	39.64	19	13	3.827	19
			-60.2677							mock vs. Ru360 10μM	21.13	-15.66	36.79	46.64	19	15	0.7889	19.45
			-15.1777
			-12.6237
			-19.2165
			-62.172
			-4.346
			-130.823
3 dpf cytoRGECO
Brown-Forsythe ANOVA test
F* (DFn, DFd)	15.11 (3.000, 35.30)
P value	<0.0001
P value summary	****
Significant diff. among means (P < 0.05)?	Yes
Welch's ANOVA test
W (DFn, DFd)	11.89 (3.000, 19.33)
P value	0.0001
P value summary	***
Significant diff. among means (P < 0.05)?	Yes
Data summary
Number of treatments (columns)	4
Number of values (total)	61
Multiple comparison
Number of families	1
Number of comparisons per family	3
Alpha	0.05
Dunnett's T3 multiple comparisons test	Mean Diff.	95.00% CI of diff.	Significant?	Summary	Adjusted P Value	A-?
mock vs. Israd 10μM	98	-6.210 to 202.2	Yes	*	0.0337	B	Column B
mock vs. BayK 10μM	-184.4	-295.8 to -73.08	Yes	***	0.0005	C	Column C
mock vs. Ru360 10μM	-9.148	-112.9 to 94.61	No	ns	0.9904	D	Column D
Test details	Mean 1	Mean 2	Mean Diff.	SE of diff.	n1	n2	t	DF
mock vs. Israd 10μM	-1.336	-99.34	98	30.39	25	8	3.225	8.47
mock vs. BayK 10μM	-1.336	183.1	-184.4	36.88	25	14	5.001	14.76
mock vs. Ru360 10μM	-1.336	7.812	-9.148	34.37	25	14	0.2662	15.05

## Sheet: Figure 6E-F
Figure 6E										Figure 6F
3 dpf mitoGCaMP3										5 dpf
mock treated	Israd 10μM	BayK 10μM	Ru360 10μM							mock treated	isradipine	Ru360
-264.776	-840.902	839.765	-445.708							1821.42
120.488	-285.146	1214.04	-82.719							1398.45
32.716	-205.669	571.903	-145.181							1164.66
62.559	-826.653	1522.28								1108
55.875	-327.212	1337.85	-1581.71							948.309
-525.512	-215.525	1815.48	-277.839							1037.48
-30.346	-265.861	717.164	-510.676							1467.43
314.673	-94.131	1682.94	-922.062							1678.28
249.925	-138.932	1238.61	-1118.7							1931.84
5.804	-228.766	570.162	-1060.91							1767.56
-76.176	-160.731	1344.43	-9							1576.12
-161.498	-63.263	1323.04	-873.161							2104.63
-117.65	-274.031	1911.94	-774.032							2699.52
-52.546	-567.921	1708.67	-874.806								1103.4
-451.35	-458.45	1989.2									1000.34
-32.661	-445.624										1588.34
-185.901	-333.382										1124.52
116.028											920.418
67.223											878.457
											1679.95
											1180.72
											1105.72
											1093.32
Brown-Forsythe ANOVA test											1665.37
F* (DFn, DFd)	81.11 (3.000, 36.08)										1522.64
P value	<0.0001										1759.51
P value summary	****											1341.5
Significant diff. among means (P < 0.05)?	Yes											1163.35
												998.941
Welch's ANOVA test												1064.91
W (DFn, DFd)	55.76 (3.000, 28.92)											1143.71
P value	<0.0001											1429.37
P value summary	****											1409.56
Significant diff. among means (P < 0.05)?	Yes											1591.3
												1476.47
Data summary												1947.77
Number of treatments (columns)	4											1889.61
Number of values (total)	64
Multiple comparison
Number of families	1
Number of comparisons per family	3
Alpha	0.05									Brown-Forsythe ANOVA test
										F* (DFn, DFd)	9.572 (2.000, 16.55)
Holm-Sidak's multiple comparisons test	Mean Diff.	Significant?	Summary	Adjusted P Value	A-?					P value	0.0017
mock vs. Israd 10μM	291.2	Yes	***	0.0007	B	Column B				P value summary	**
mock vs. BayK 10μM	-1365	Yes	****	<0.0001	C	Column C				Significant diff. among means (P < 0.05)?	Yes
mock vs. Ru360 10μM	621.5	Yes	***	0.0007	D	Column D
										Welch's ANOVA test
Test details	Mean 1	Mean 2	Mean Diff.	SE of diff.	n1	n2	t	DF		W (DFn, DFd)	16.83 (2.000, 20.99)
mock vs. Israd 10μM	-45.95	-337.2	291.2	73.44	19	17	3.965	32.75		P value	<0.0001
mock vs. BayK 10μM	-45.95	1319	-1365	130.8	19	15	10.44	18.41		P value summary	****
mock vs. Ru360 10μM	-45.95	-667.4	621.5	138.5	19	13	4.487	15.35		Significant diff. among means (P < 0.05)?	Yes
										Data summary
										Number of treatments (columns)	3
										Number of values (total)	37
										Multiple comparison
										Number of families	1
										Number of comparisons per family	2
										Alpha	0.05
										Dunnett's T3 multiple comparisons test	Mean Diff.	95.00% CI of diff.	Significant?	Summary	Adjusted P Value	A-?
										mock vs. Israd 10μM	786.1	166.9 to 1405	Yes	**	0.0053	B	isradipine
										mock vs. Ru360 10μM	494.3	247.4 to 741.2	Yes	****	<0.0001	D	Ru360
										Test details	Mean 1	Mean 2	Mean Diff.	SE of diff.	n1	n2	t	DF
										mock vs. Israd 10μM	54.45	-731.7	786.1	219.1	13	13	3.588	14.89
										mock vs. Ru360 10μM	54.45	-439.9	494.3	90.62	13	11	5.455	21.29

## Sheet: Figure 6H-I
Figure 6H										Figure 6I
3 dpf Rex-YFP										5 dpf Rex-YFP
mock treated	NAD+ 100uM	Israd 10uM	Ru360 10uM	NADH 5mM						mock treated	Isradipine 10uM	Ru360 10uM
-8.02214	249.6	121.216	94.3388							-1.46286	-30.3999	-19.2359
-40.3562	185.153	99.8439	83.1549							-28.2998	0.221141	0.493144
-91.0132	320.34	91.5949	67.3968							-9.45183	-1.17086	0.606136
27.0689	104.788		25.6969							11.0191	-0.379857	-6.58486
35.0269	77.2159		43.2298							31.2842	29.0151
36.4898	77.4149		29.2269							13.7491	11.0892
40.8059			52.8978							-16.8379	14.8341
-44.7165	123.227	6.28047	-31.9775								0.28915
-68.5935	39.3455	-12.8115	-37.1125							18.7131	-49.6169	-23.5269
15.9655	24.0475	34.9145	-8.7635							-5.82087	-39.7369	-14.3459
31.0815	9.0175	41.7325	9.21849							9.36913	-34.1759	2.41712
31.9245	14.7475	38.3855	8.55449							10.1531	-49.2879	0.838127
34.3385	21.9445									1.59512	-38.3449	3.13512
	6.95451									-3.92689
	9.49046									-10.1229
-90.2247		45.8803								-19.9599
58.8093		-9.96065
31.4153		-35.6227
		14.5513
		-29.4197								ANOVA summary
		-14.5917								Brown-Forsythe ANOVA test
0.0108032		14.8788								F* (DFn, DFd)	2.104 (2.000, 23.78)
0.704773		12.7678								P value	0.1441
8.85779		12.5338								P value summary	ns
-8.39319		78.9348								Significant diff. among means (P < 0.05)?	No
-1.18018
-15.396				-15.555						Welch's ANOVA test
8.87801				-8.65398						W (DFn, DFd)	1.571 (2.000, 21.71)
1.92501				-19.202						P value	0.2305
-7.96098				-51.279						P value summary	ns
-7.473				-29.571						Significant diff. among means (P < 0.05)?	No
19.734				-9.059
0.292986				-20.5981						Data summary
				-46.113						Number of treatments (columns)	3
3.78948										Number of values (total)	37
7.90142
2.19445										Multiple comparison
-33.1335										Number of families	1
-26.0875										Number of comparisons per family	2
15.4025										Alpha	0.05
16.2665
11.8564										Holm-Sidak's multiple comparisons test	Mean Diff.	Significant?	Summary
-15.6695										mock vs. Column israd	14.44	No	ns
-8.96253										mock vs. Column ru360	6.245	No	ns
9.20647
8.96551										Test details	Mean 1	Mean 2	Mean Diff.
8.27044										mock vs. Column israd	1.067e-06	-14.44	14.44
										mock vs. Column ru360	1.067e-06	-6.245	6.245
21.7742				-163.351
-11.3198				-164.63
51.3171				-48.186
-34.6698				-90.496
-34.6698				-58.61
7.56816
0.653167		0.956167	3.65817
3.69417		3.19317	4.16917
-3.60383		5.79017	6.49117
-0.334833		3.45417	2.27117
-1.74083		0.489167	4.40117
1.33217		2.31917	0.634167
		0.823167	1.64417
			3.54517
			1.33717
			4.52117
3 dpf Rex-YFP
Brown-Forsythe ANOVA test
F* (DFn, DFd)	11.18 (4.000, 30.22)
P value	<0.0001
P value summary	****
Significant diff. among means (P < 0.05)?	Yes
Welch's ANOVA test
W (DFn, DFd)	8.462 (4.000, 37.38)
P value	<0.0001
P value summary	****
Significant diff. among means (P < 0.05)?	Yes
Data summary
Number of treatments (columns)	5
Number of values (total)	127
Multiple comparison
Number of families	1
Number of comparisons per family	4
Alpha	0.05
Holm-Sidak's multiple comparisons test	Mean Diff.	Significant?	Summary	Adjusted P Value	A-?
mock vs. NAD+	-90.23	Yes	*	0.0138	B	Column B
mock vs. israd	-21.13	Yes	*	0.0476	C	Column C
mock vs.ru360	-16.75	Yes	*	0.0485	D	Column D
mock vs. NADH	55.79	Yes	*	0.0109	F	Column F
Test details	Mean 1	Mean 2	Mean Diff.	SE of diff.	n1	n2	t	DF
mock vs. NAD+	-7.504e-07	90.23	-90.23	26.68	53	14	3.383	13.65
mock vs. israd	-7.504e-07	21.13	-21.13	8.986	53	25	2.351	37.48
mock vs.ru360	-7.504e-07	16.75	-16.75	8.202	53	22	2.042	36.18
mock vs. NADH	-7.504e-07	-55.79	55.79	15.35	53	13	3.634	13.94
