# Supplementary material for: Synaptic mitochondria regulate hair-cell synapse size and function
Source: eLife journal article supplement (doi:10.7554/elife.48914), 2019-10-14
Supplement: supp [file elife-48914-supp-v1.zip › elife_poa_e48914_Figure_7_figure_supplement_1_source_data_1.xlsx]

## Sheet: Figure 7 S1
															PANEL A			PANEL B
	5d					3d								Column B	NAD+ 100 μM 1 hr	NADH 5 mM 1hr		NAD+ 100 μM 1 hr	NADH 5 mM 1hr
	PANEL A					PANEL B								vs.	vs.	vs.		vs.	vs.
	DMSO	NAD+ 100 μM 1 hr	Tris	NADH 5 mM 1hr		DMSO	NAD+ 100 μM 1 hr	Tris	NADH 5 mM 1hr					Column A	E3	Tris		DMSO	Tris
	0.188	0.2358	0.2175	0.2813		0.276	0.2452	0.2445	0.281
	0.2422	0.2143	0.1555	0.2569		0.3085	0.3099	0.3023	0.2106					Unpaired t test with Welch's correction
	0.2563	0.2201	0.2645	0.2651		0.1787	0.2593	0.202	0.2809					P value	0.1545	0.209		0.3893	0.7198
	0.2205	0.1846	0.2104	0.2816		0.2559	0.2775	0.1988	0.1559					P value summary	ns	ns		ns	ns
	0.2295	0.1897	0.2876	0.2491		0.2635	0.2341	0.1878	0.2341					Significantly different (P < 0.05)?	No	No		No	No
	0.2255	0.2513	0.2951	0.2998		0.2315	0.1993	0.2584	0.1704					One- or two-tailed P value?	Two-tailed	Two-tailed		Two-tailed	Two-tailed
	0.192	0.2452	0.3222	0.2944		0.2281	0.2965	0.2299	0.2336					t, df	t=1.475, df=22	t=1.296, df=21		t=0.8790, df=21	t=0.3643, df=18
	0.2582	0.1844	0.2016	0.2311		0.2644	0.2352	0.2205	0.2107
	0.2583	0.2337	0.2706	0.2702		0.1183	0.2116	0.1996	0.1944					How big is the difference?
	0.2489	0.1805	0.199	0.2228		0.2522	0.2856	0.1467	0.1454					Mean of column A	0.2274	0.2469		0.2385	0.2191
	0.2051	0.2078	0.292	0.2622		0.2461	0.2505							Mean of column B	0.212	0.2692		0.2542	0.2117
	0.204	0.1967		0.3164			0.2456							Difference between means (B - A) ± SEM	-0.01537 ± 0.01042	0.02233 ± 0.01723		0.01572 ± 0.01788	-0.007350 ± 0.02017
														95% confidence interval	-0.03698 to 0.006245	-0.01350 to 0.05816		-0.02147 to 0.05291	-0.04973 to 0.03503
														R squared (eta squared)	0.08995	0.07408		0.03549	0.007321
														F test to compare variances
														F, DFn, Dfd	1.045, 11, 11	3.627, 10, 11		2.372, 10, 11	1.215, 9, 9
														P value	0.9428	0.0453		0.1725	0.7766
														P value summary	ns	*		ns	ns
														Significantly different (P < 0.05)?	No	Yes		No	No
														Data analyzed
														Sample size, column A	12	11		11	10
														Sample size, column B	12	12		12	10
