# Supplementary material for: Synaptic mitochondria regulate hair-cell synapse size and function
Source: eLife journal article supplement (doi:10.7554/elife.48914), 2019-10-14
Supplement: supp [file elife-48914-supp-v1.zip › elife_poa_e48914_Figure_7_source_data_1.xlsx]

## Sheet: Figure 7D
Figure 7D
3 dpf Synapse count
Synapse count
E3	NAD+ 100 μM 1 hr	Tris	NADH 5 mM 1 hr		Table Analyzed	day 3		Table Analyzed	day 3
2.5	2.5	3.07692	3.2
2.3	3.25	2.7	2.41667		Column B	NAD+ 100 μM 1 hr		Column D	NADH 5 mM 1 hr
2	2.5	2.42857	2.71429		vs.	vs.		vs.	vs.
3.2	2.18182	2	1.77778		Column A	E3		Column C	Tris
1.9	2.75	3	2.33333
2	2.5	2.63636	1.72727		Unpaired t test			Unpaired t test
4.6	3.125	2.18182	2.28571		P value	0.6096		P value	0.9127
1.91667	2.55556	3.09091	2.7		P value summary	ns		P value summary	ns
2.1	3	2.14286	3.33333		Significantly different (P < 0.05)?	No		Significantly different (P < 0.05)?	No
1.66667	3	2	2.66667		One- or two-tailed P value?	Two-tailed		One- or two-tailed P value?	Two-tailed
3.625	2.625	2.22222	3.2		t, df	t=0.5184, df=21		t, df	t=0.1109, df=22
	2.11111	1.78571	1.21429
					How big is the difference?			How big is the difference?
					Mean of column A	2.528		Mean of column C	2.439
					Mean of column B	2.675		Mean of column D	2.464
					Difference between means (B - A) ± SEM	0.1468 ± 0.2833		Difference between means (D - C) ± SEM	0.02533 ± 0.2285
					95% confidence interval	-0.4423 to 0.7360		95% confidence interval	-0.4485 to 0.4992
					R squared (eta squared)	0.01263		R squared (eta squared)	0.0005582
					F test to compare variances			F test to compare variances
					F, DFn, Dfd	6.393, 10, 11		F, DFn, Dfd	2.040, 11, 11
					P value	0.0051		P value	0.2525
					P value summary	**		P value summary	ns
					Significantly different (P < 0.05)?	Yes		Significantly different (P < 0.05)?	No
					Data analyzed			Data analyzed
					Sample size, column A	11		Sample size, column C	12
					Sample size, column B	12		Sample size, column D	12

## Sheet: Figure 7E
Figure 7E
3 dpf ribbon size
DMSO	NAD+ 100 μM 1 hr	Tris	NADH 5 mM 1hr		Table Analyzed	3 dpf ribbon area NADH NAD	Table Analyzed	3 dpf ribbon area NADH NAD
0.2926	0.3496	0.3885	0.2864
0.3028	0.3918	0.3317	0.283		Column B	NAD+ 100 μM 1 hr	Column D	NADH 5 mM 1hr
0.366	0.4194	0.2615	0.2837		vs.	vs.	vs.	vs.
0.2859	0.346	0.3079	0.3109		Column A	DMSO	Column C	Tris
0.2853	0.3634	0.264	0.3104
0.2733	0.3448	0.3435	0.2622		Unpaired t test with Welch's correction		Unpaired t test with Welch's correction
0.3336	0.3245	0.2965	0.3154		P value	0.0049	P value	0.0086
0.3564	0.3134	0.3662	0.2836		P value summary	**	P value summary	**
0.3035	0.311	0.3294	0.2831		Significantly different (P < 0.05)?	Yes	Significantly different (P < 0.05)?	Yes
0.3175	0.406	0.3186	0.3179		One- or two-tailed P value?	Two-tailed	One- or two-tailed P value?	Two-tailed
0.2914	0.3242	0.3682	0.2026		Welch-corrected t, df	t=3.144, df=20.89	Welch-corrected t, df	t=2.883, df=21.99
	0.3436	0.3212	0.1971
					How big is the difference?		How big is the difference?
					Mean of column A	0.3098	Mean of column C	0.3248
					Mean of column B	0.3531	Mean of column D	0.278
					Difference between means (B - A) ± SEM	0.04330 ± 0.01377	Difference between means (D - C) ± SEM	-0.04674 ± 0.01621
					95% confidence interval	0.01464 to 0.07195	95% confidence interval	-0.08037 to -0.01311
					R squared (eta squared)	0.3211	R squared (eta squared)	0.2743
					F test to compare variances		F test to compare variances
					F, DFn, Dfd	1.388, 11, 10	F, DFn, Dfd	1.052, 11, 11
					P value	0.6129	P value	0.935
					P value summary	ns	P value summary	ns
					Significantly different (P < 0.05)?	No	Significantly different (P < 0.05)?	No
					Data analyzed		Data analyzed
					Sample size, column A	11	Sample size, column C	12
					Sample size, column B	12	Sample size, column D	12

## Sheet: Figure 7I
Figure 7D
5 dpf Synapse count
synapses per hair cell
E3	NAD+ 100 μM 1 hr	Tris	NADH 5 mM 1 hr		Table Analyzed	day 5		Table Analyzed	day 5
3.57143	2.30769	3	2.77778
2.57143	3	3.23529	2.66667		Column B	NAD+ 100 μM 1 hr		Column D	NADH 5 mM 1 hr
3	3.06667	2.05556	3		vs.	vs.		vs.	vs.
2.58333	3.1875	2	2.90909		Column A	E3		Column C	Tris
2.91667	2.84615	2.66667	3.29412
3.35714	2.4	3.1875	2.625		Unpaired t test			Unpaired t test
2.64286	2.76923	3.42857	2.93333		P value	0.9948		P value	0.6747
2.625	2.81818	2.5	3.71429		P value summary	ns		P value summary	ns
	2.54546	3.18182	2.5		Significantly different (P < 0.05)?	No		Significantly different (P < 0.05)?	No
2.73333	3.35714	3.26316	3.2		One- or two-tailed P value?	Two-tailed		One- or two-tailed P value?	Two-tailed
2.46154	3		2.61538		t, df	t=0.006607, df=19		t, df	t=0.4259, df=20
			2.92857
					How big is the difference?			How big is the difference?
					Mean of column A	2.846		Mean of column C	2.852
					Mean of column B	2.845		Mean of column D	2.93
					Difference between means (B - A) ± SEM	-0.0009981 ± 0.1511		Difference between means (D - C) ± SEM	0.07850 ± 0.1843
					95% confidence interval	-0.3172 to 0.3152		95% confidence interval	-0.3059 to 0.4629
					R squared (eta squared)	2.298e-06		R squared (eta squared)	0.008989
					F test to compare variances			F test to compare variances
					F, DFn, Dfd	1.270, 9, 10		F, DFn, Dfd	2.274, 9, 11
					P value	0.7113		P value	0.1999
					P value summary	ns		P value summary	ns
					Significantly different (P < 0.05)?	No		Significantly different (P < 0.05)?	No
					Data analyzed			Data analyzed
					Sample size, column A	10		Sample size, column C	10
					Sample size, column B	11		Sample size, column D	12

## Sheet: Figure 7J
Figure 7J
5 dpf ribbion size
E3	NAD+ 100 μM 1 hr	Tris	NADH 5 mM 1hr			Table Analyzed	5 dpf ribbon area NADH NAD		Table Analyzed	5 dpf ribbon area NADH NAD
0.2947	0.278	0.3082	0.4606
0.3184	0.3241	0.3168	0.355			Column B	NAD+ 100 μM 1 hr		Column D	NADH 5 mM 1hr
0.2763	0.2968	0.4556	0.3678			vs.	vs.		vs.	vs.
0.3399	0.286	0.3409	0.4059			Column A	E3		Column C	Tris
0.387	0.3388	0.3368	0.3153
0.373	0.3288	0.3288	0.2772			Unpaired t test with Welch's correction			Unpaired t test with Welch's correction
0.3209	0.3195	0.4898	0.3126			P value	0.4801		P value	0.7692
0.3005	0.3082	0.276	0.2808			P value summary	ns		P value summary	ns
0.2582	0.3692	0.2834	0.3154			Significantly different (P < 0.05)?	No		Significantly different (P < 0.05)?	No
0.4781	0.3505	0.3005	0.2712			One- or two-tailed P value?	Two-tailed		One- or two-tailed P value?	Two-tailed
0.3301	0.3053	0.2691	0.328			Welch-corrected t, df	t=0.7238, df=15.23		Welch-corrected t, df	t=0.2974, df=20.34
0.2982	0.3076		0.4554
						How big is the difference?			How big is the difference?
						Mean of column A	0.3313		Mean of column C	0.3369
						Mean of column B	0.3177		Mean of column D	0.3454
						Difference between means (B - A) ± SEM	-0.01354 ± 0.01871		Difference between means (D - C) ± SEM	0.008533 ± 0.02869
						95% confidence interval	-0.05336 to 0.02628		95% confidence interval	-0.05125 to 0.06832
						R squared (eta squared)	0.03325		R squared (eta squared)	0.00433
						F test to compare variances			F test to compare variances
						F, DFn, Dfd	4.996, 11, 11		F, DFn, Dfd	1.196, 10, 11
						P value	0.0129		P value	0.7691
						P value summary	*		P value summary	ns
						Significantly different (P < 0.05)?	Yes		Significantly different (P < 0.05)?	No
						Data analyzed			Data analyzed
						Sample size, column A	12		Sample size, column C	11
						Sample size, column B	12		Sample size, column D	12
