# Supplementary figures and images for: Synaptic mitochondria regulate hair-cell synapse size and function
Source: eLife journal article supplement (doi:10.7554/elife.48914), 2019-10-14

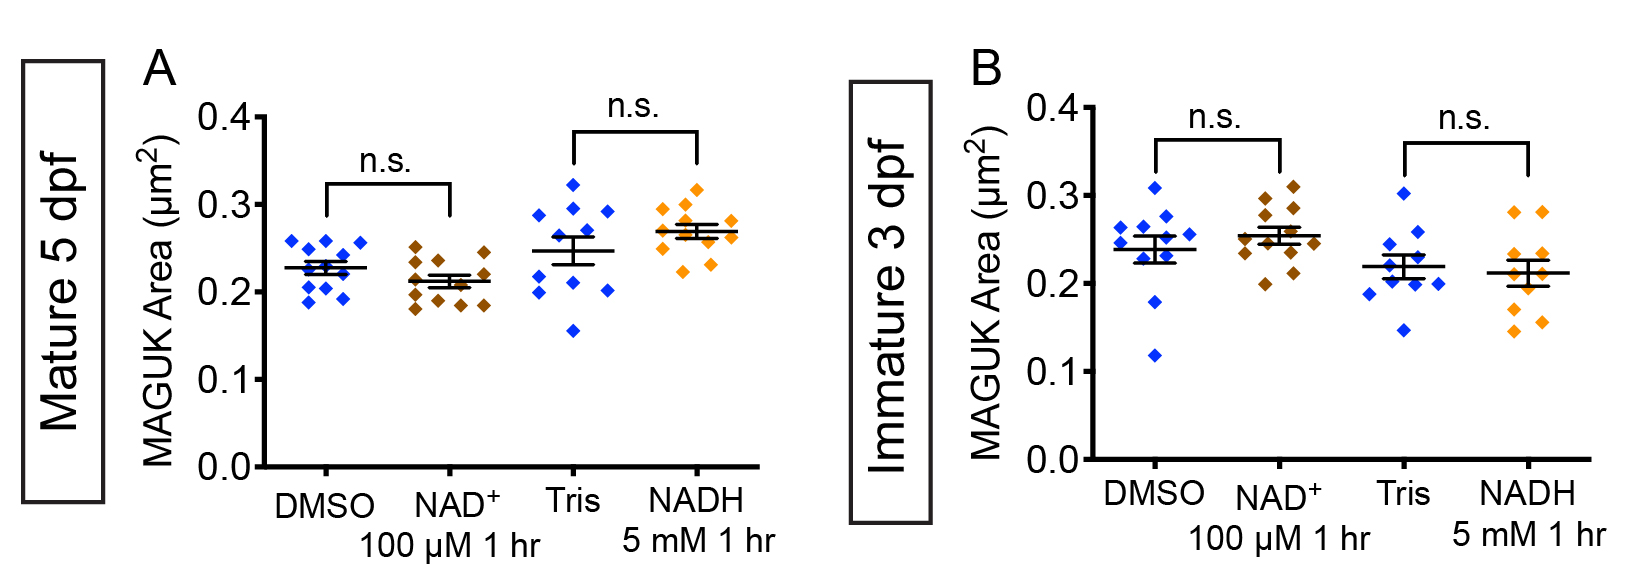

Supplement: supp [file elife-48914-supp-v1.zip › elife_poa_e48914_Figure_7_figure_supplement_1.jpg]

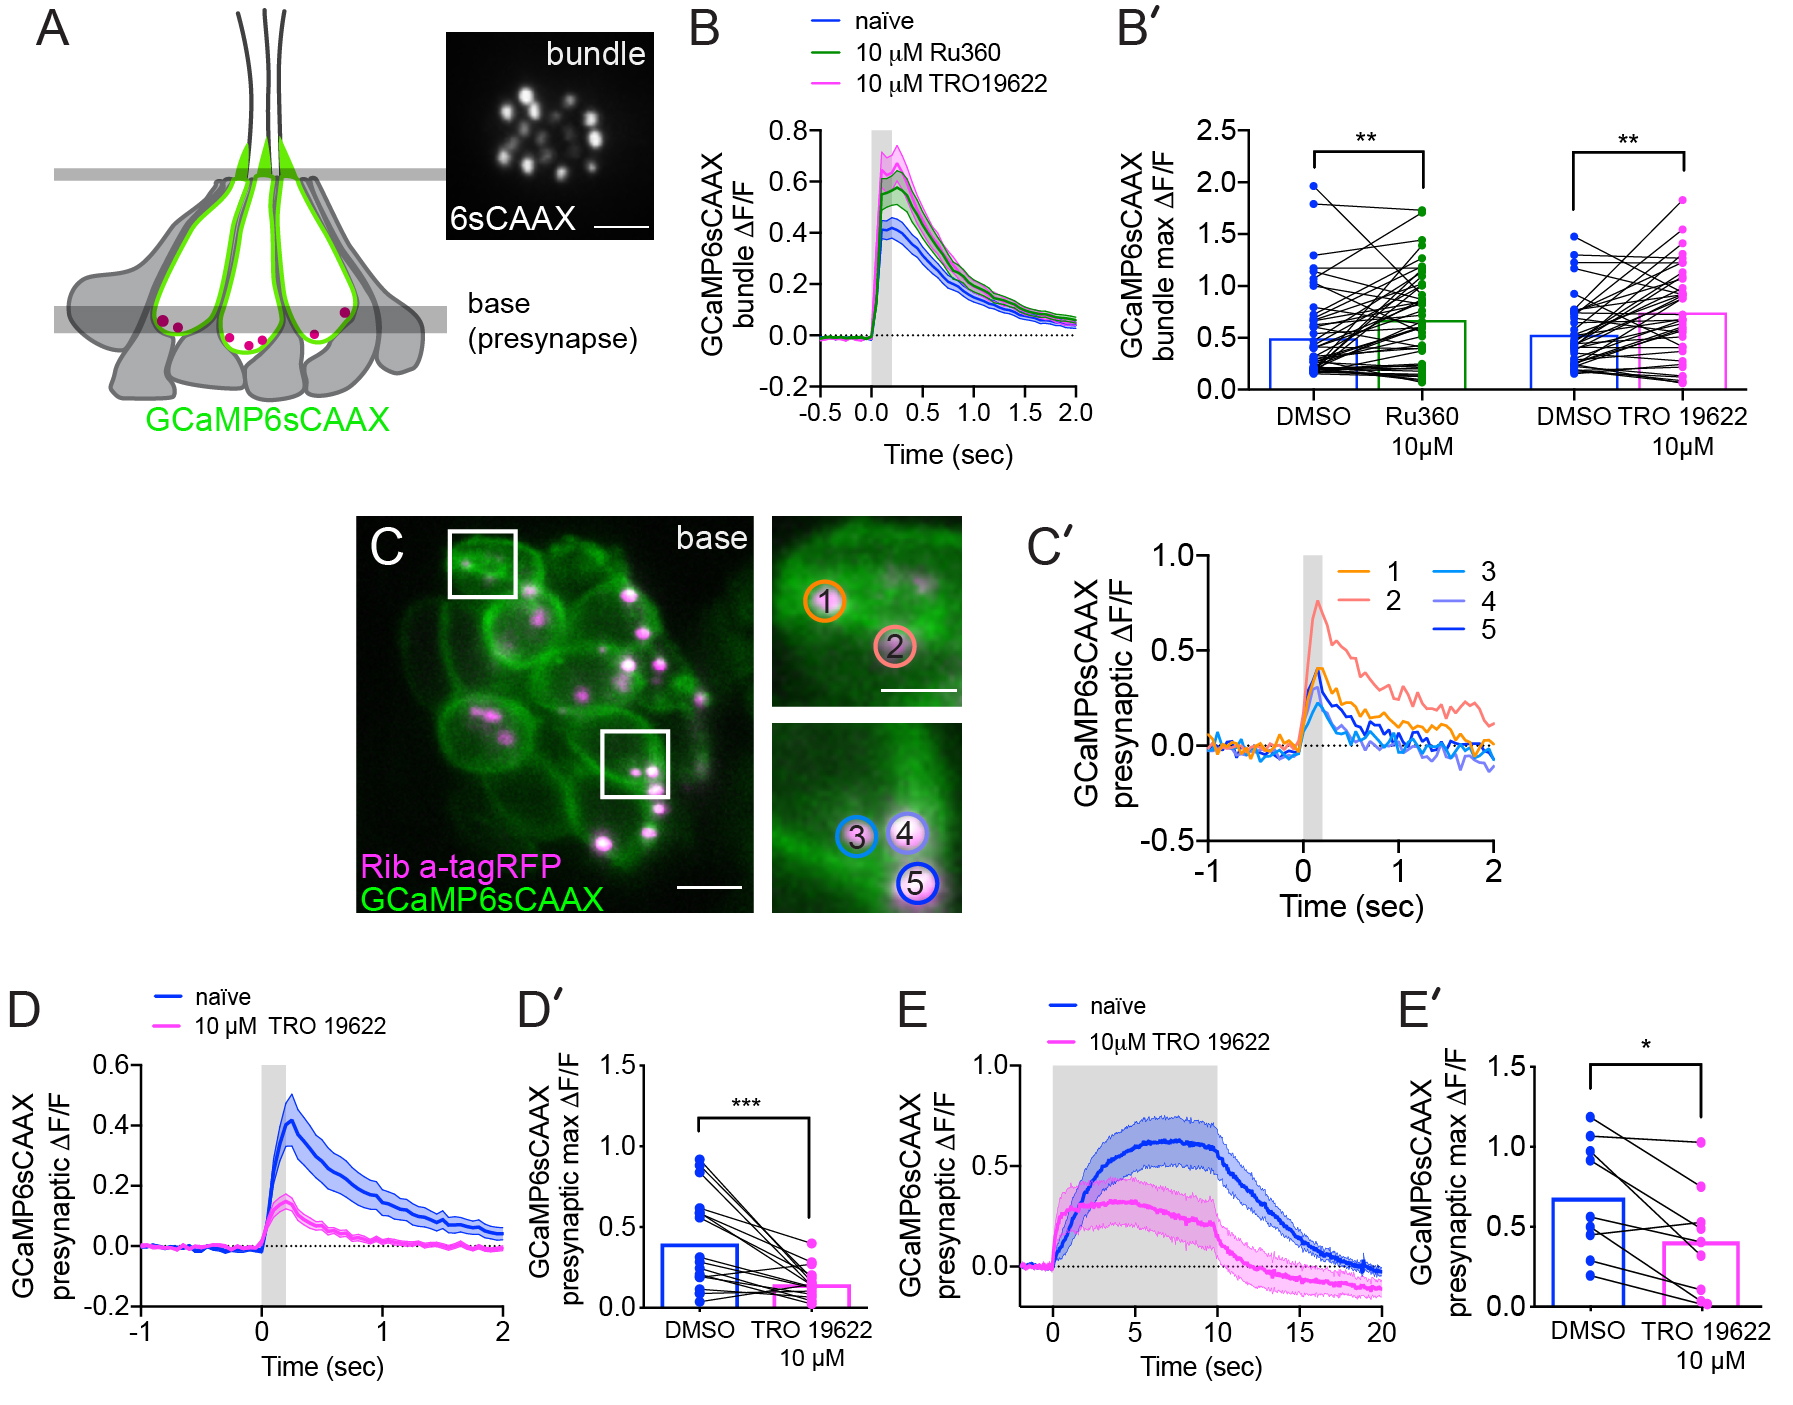

Supplement: supp [file elife-48914-supp-v1.zip › elife_poa_e48914_Figure_2_figure_supplement_1.jpg]

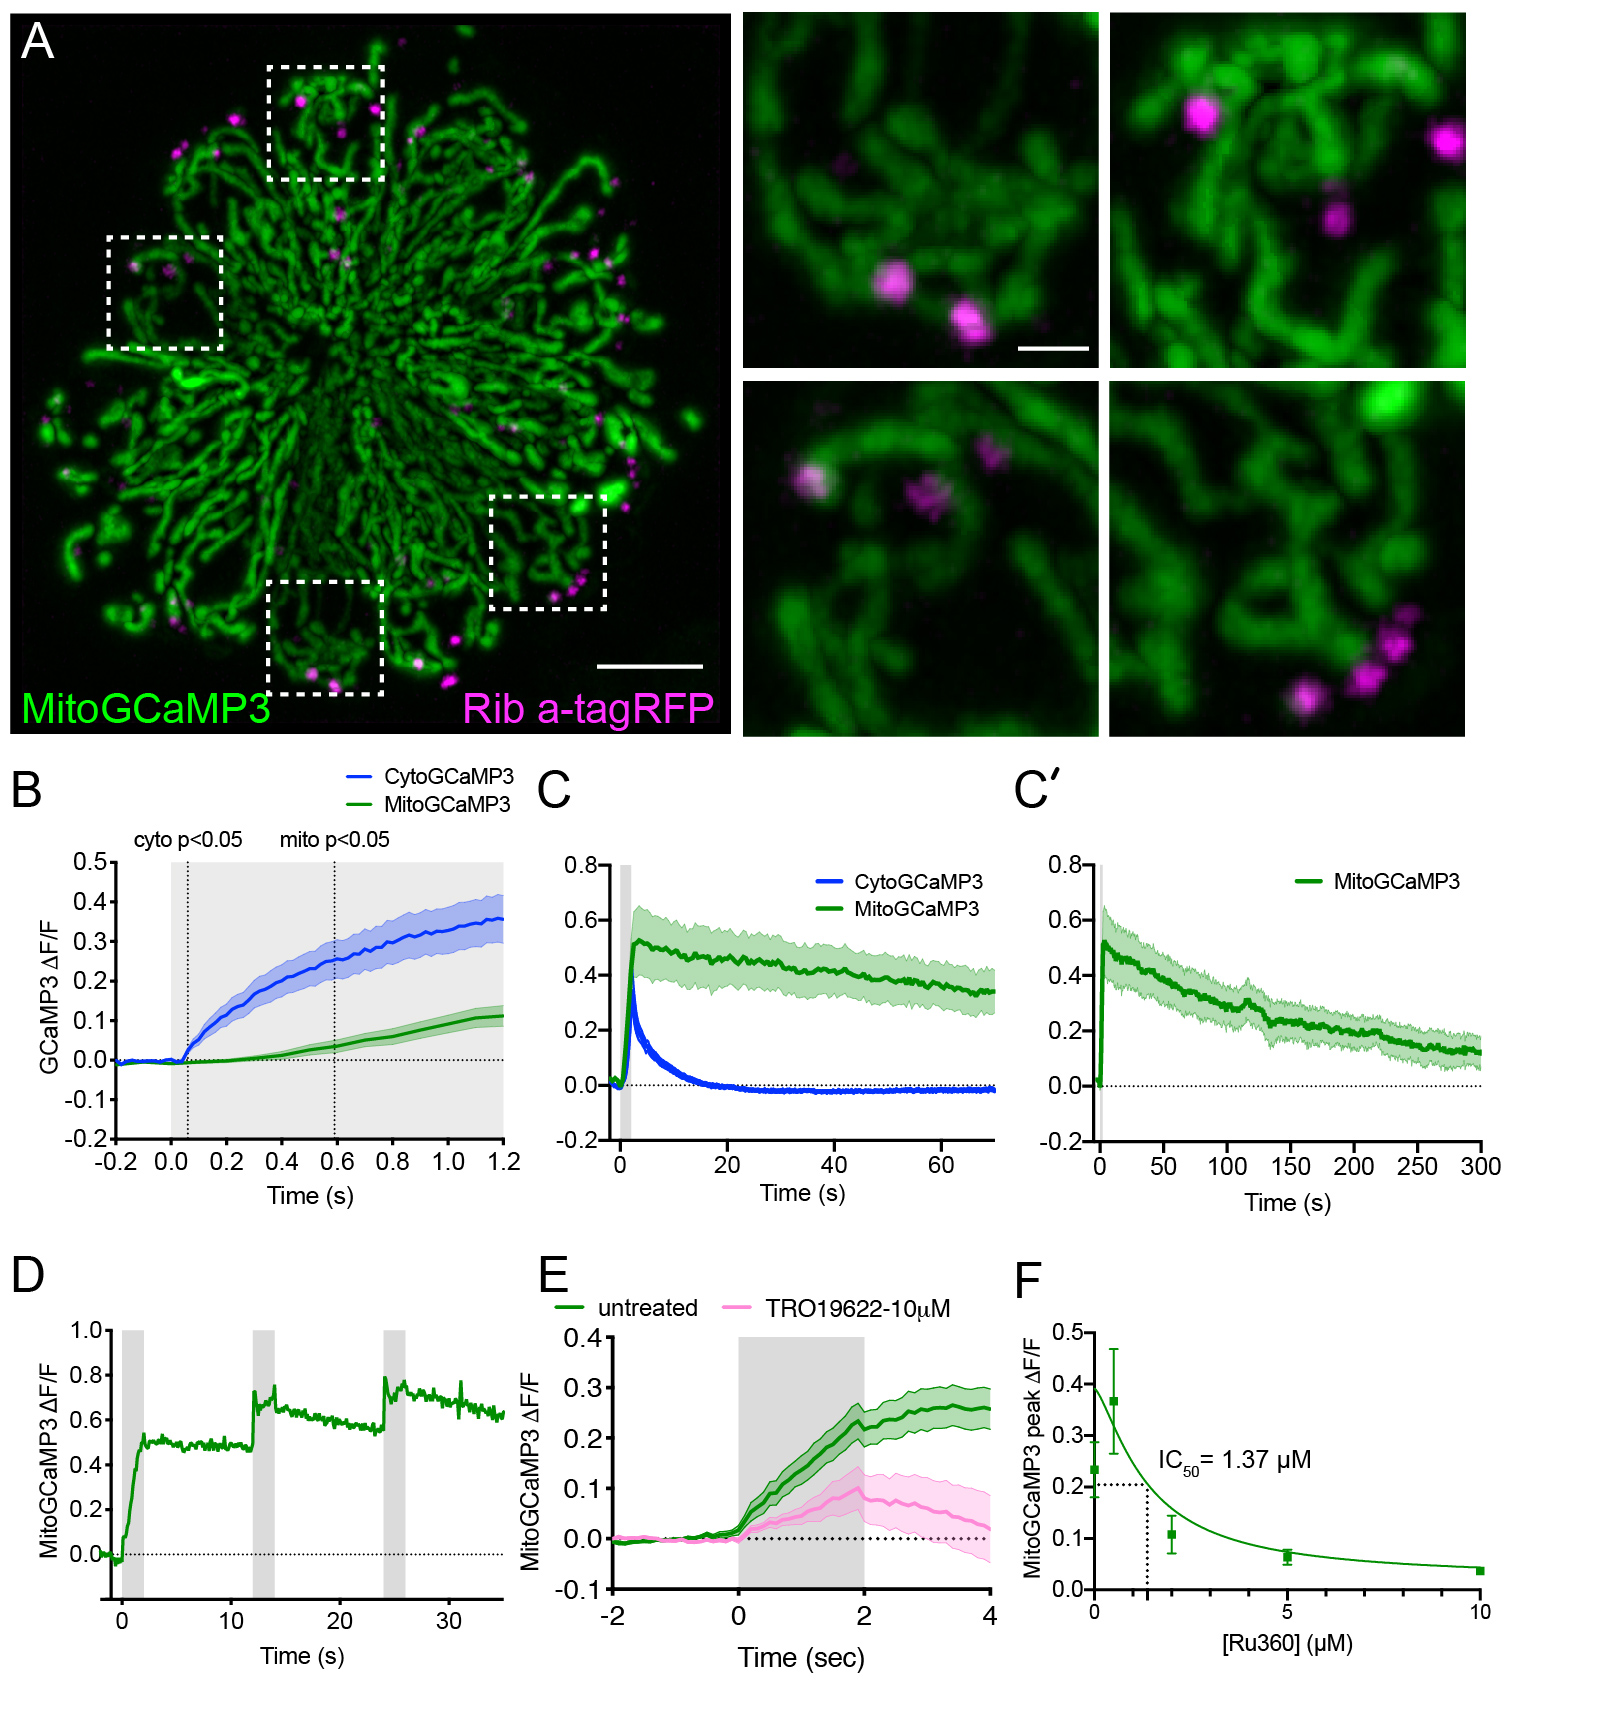

Supplement: supp [file elife-48914-supp-v1.zip › elife_poa_e48914_Figure_1_figure_supplement_1.jpg]

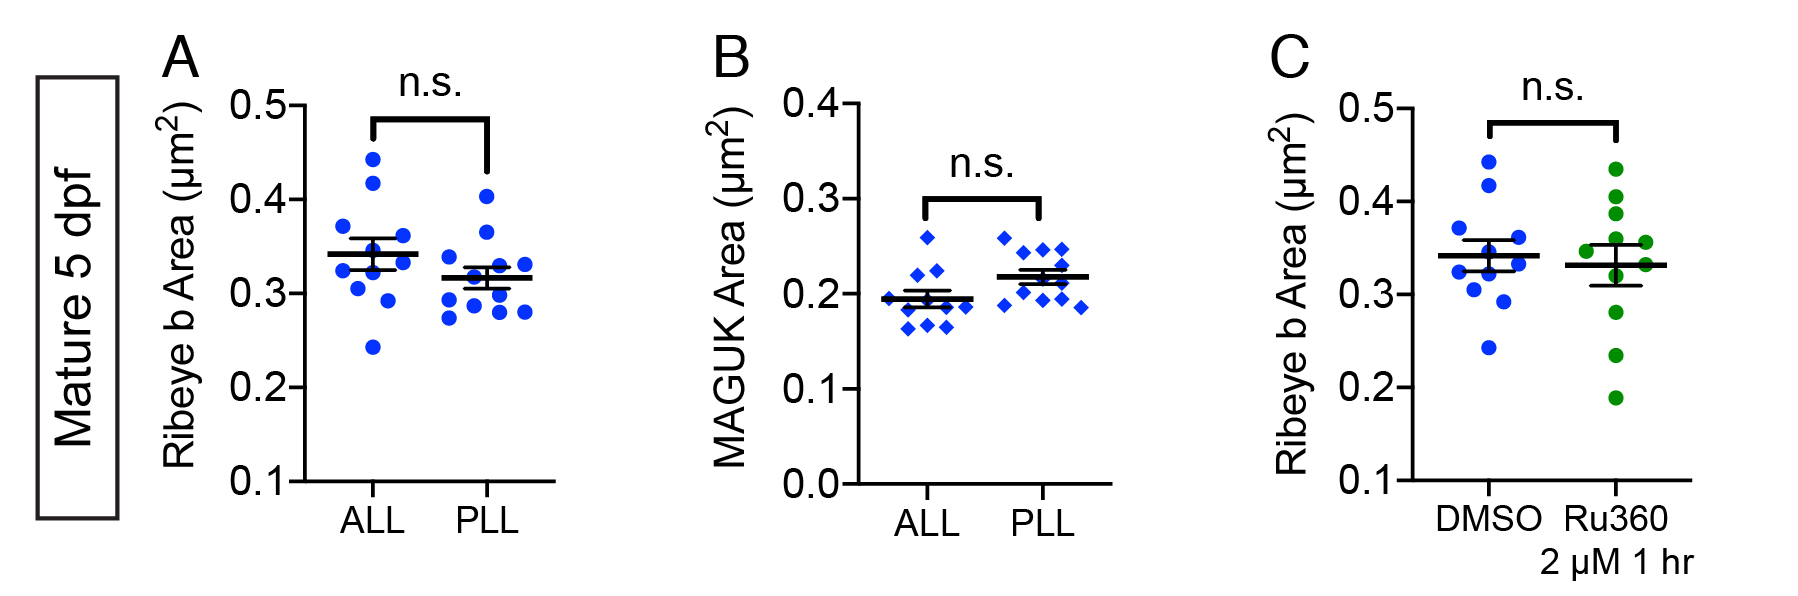

Supplement: supp [file elife-48914-supp-v1.zip › elife_poa_e48914_Figure_3_figure_supplement_1.jpg]

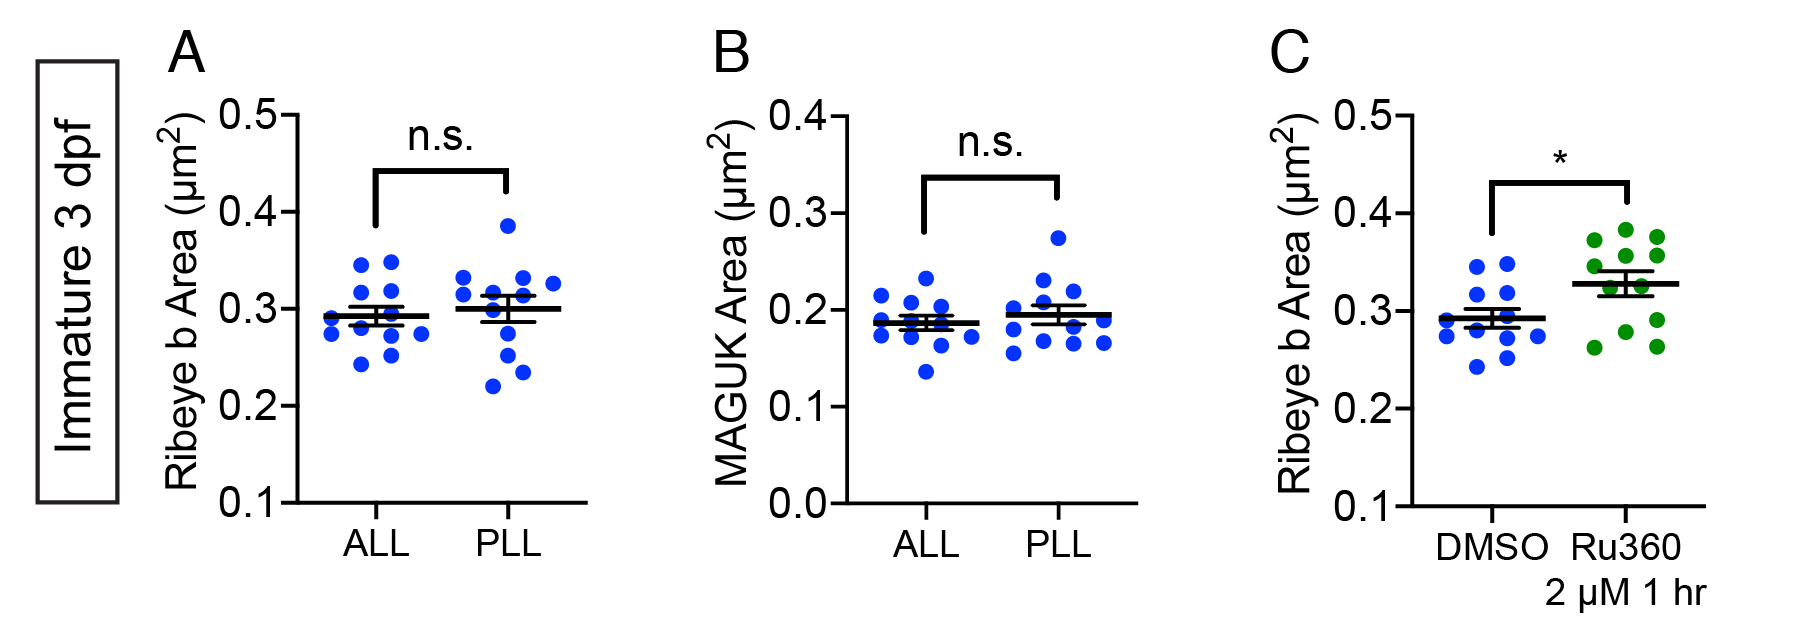

Supplement: supp [file elife-48914-supp-v1.zip › elife_poa_e48914_Figure_5_figure_supplement_1.jpg]

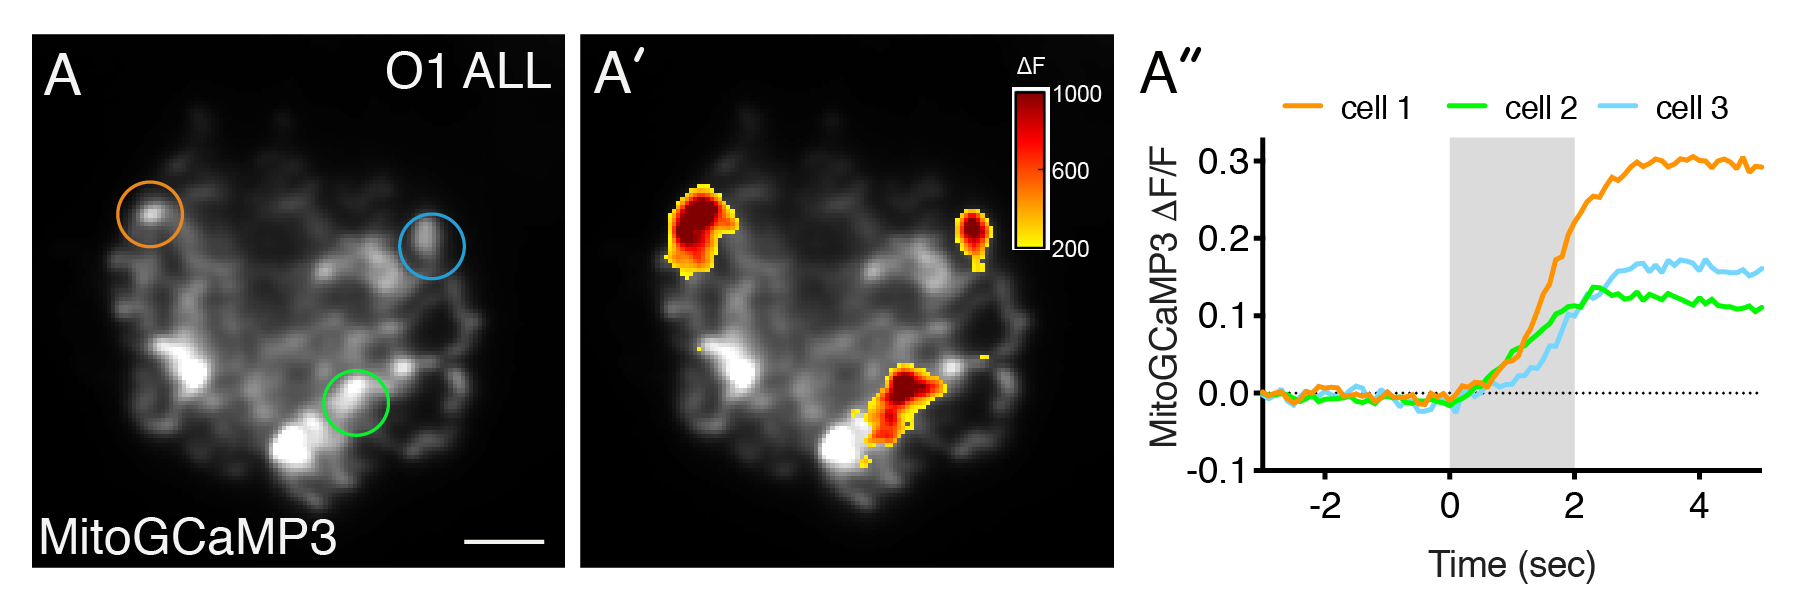

Supplement: supp [file elife-48914-supp-v1.zip › elife_poa_e48914_Figure_1_figure_supplement_2.jpg]

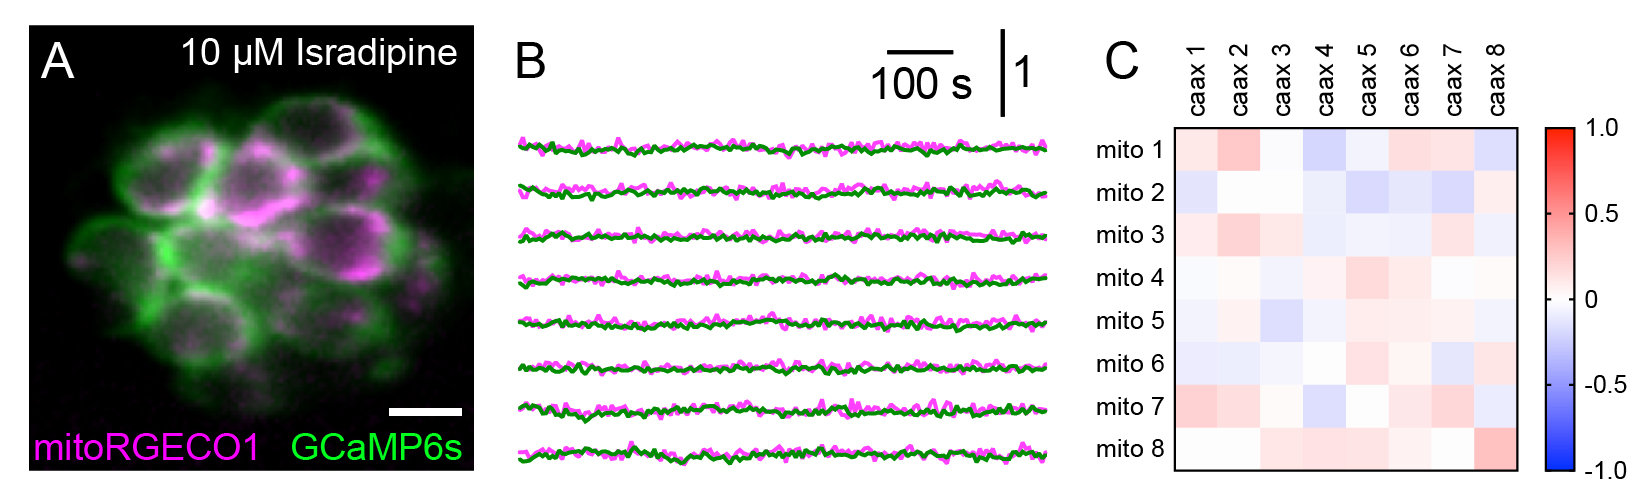

Supplement: supp [file elife-48914-supp-v1.zip › elife_poa_e48914_Figure_4_figure_supplement_1.jpg]

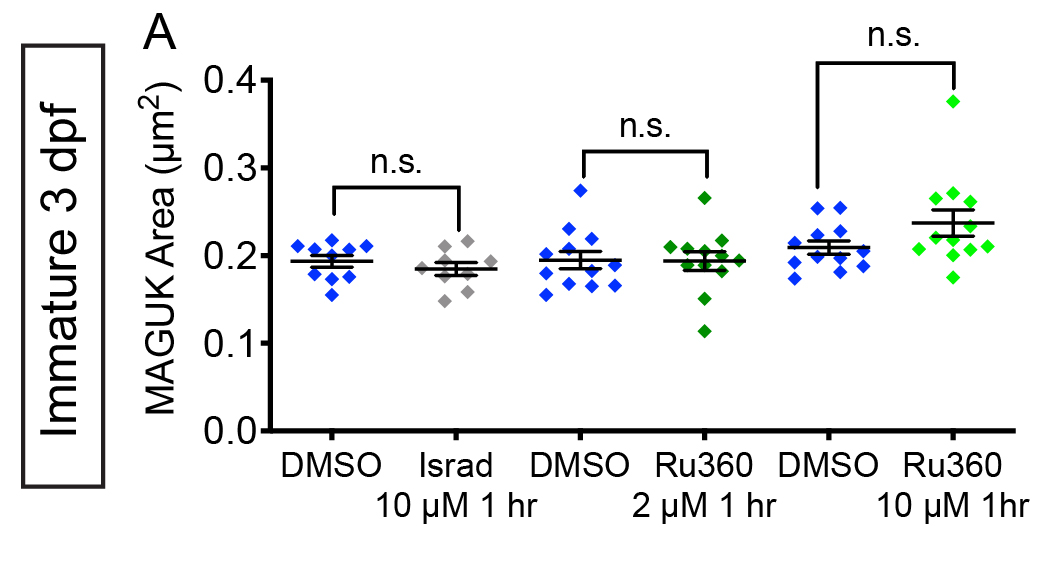

Supplement: supp [file elife-48914-supp-v1.zip › elife_poa_e48914_Figure_5_figure_supplement_2.jpg]

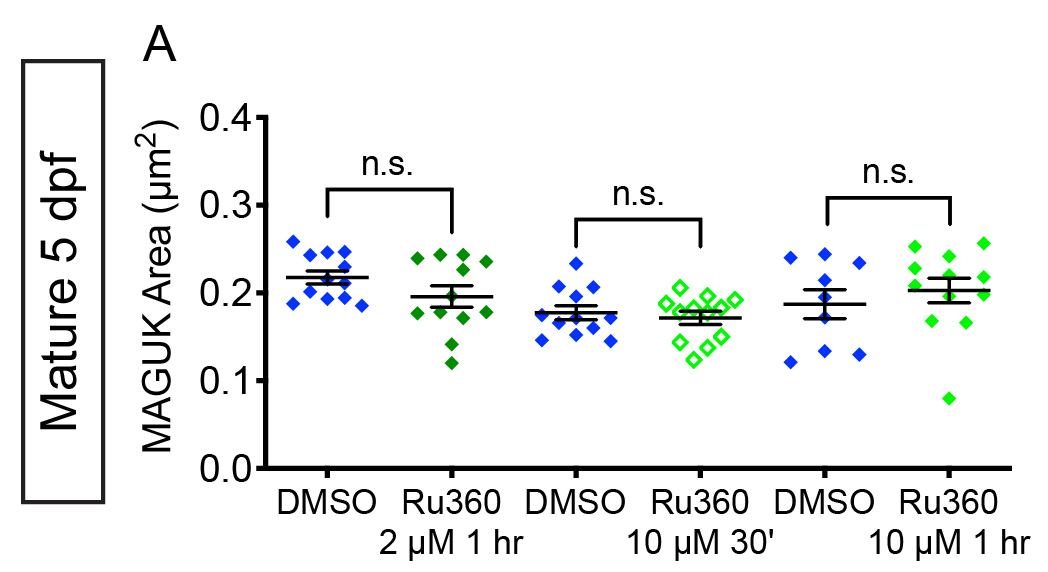

Supplement: supp [file elife-48914-supp-v1.zip › elife_poa_e48914_Figure_3_figure_supplement_2.jpg]
